# Supplementary material for: Transcriptomic profiles of poplar (Populus simonii × P. nigra) cuttings during adventitious root formation
Source: Front Genet. 2022 Sep 8;13:968544. doi: 10.3389/fgene.2022.968544 (PMC9493132; doi:10.3389/fgene.2022.968544)
Supplement: Supplementary file 11 [file Table5.XLSX]

## Sheet: root
Gene ID	Family_ID	logFC_01_H2_vs_CK_H0	logCPM_01_H2_vs_CK_H0	PValue_01_H2_vs_CK_H0	FDR_01_H2_vs_CK_H0	logFC_02_H4_vs_CK_H0	logCPM_02_H4_vs_CK_H0	PValue_02_H4_vs_CK_H0	FDR_02_H4_vs_CK_H0	logFC_03_H6_vs_CK_H0	logCPM_03_H6_vs_CK_H0	PValue_03_H6_vs_CK_H0	FDR_03_H6_vs_CK_H0	logFC_04_H8_vs_CK_H0	logCPM_04_H8_vs_CK_H0	PValue_04_H8_vs_CK_H0	FDR_04_H8_vs_CK_H0	logFC_05_H10_vs_CK_H0	logCPM_05_H10_vs_CK_H0	PValue_05_H10_vs_CK_H0	FDR_05_H10_vs_CK_H0	Significant_01_H2_vs_CK_H0	Significant_02_H4_vs_CK_H0	Significant_03_H6_vs_CK_H0	Significant_04_H8_vs_CK_H0	Significant_05_H10_vs_CK_H0	H0_rep1	H0_rep2	H2_rep1	H2_rep2	H4_rep1	H4_rep2	H6_rep1	H6_rep2	H8_rep1	H8_rep2	H10_rep1	H10_rep2		ATH_Short_description	ATH_Curator_summary	ATH_Computational_description
Potri.001G027700.v4.1	SRS	1.70228	2.02111	4.25961e-15	1.22174e-14	2.46944	2.70383	1.70224e-42	8.88106e-42	2.50709	2.72244	8.79125e-44	3.84773e-43	2.56453	2.77601	5.36936e-46	2.49683e-45	2.34895	2.63401	2.53544e-37	9.63123e-37	YES	YES	YES	YES	YES	2.81	1.28	6.73	6.99	11.87	12.23	11.63	13.83	12.88	12.55	10.84	11.83	AT5G12330.2	Lateral root primordium (LRP) protein-related	A member of SHI gene family. Arabidopsis thaliana has ten members that encode proteins with a RING finger-like zinc finger motif. Despite being highly divergent in sequence, many of the SHI-related genes are partially redundant in function and synergistically promote gynoecium, stamen and leaf development in Arabidopsis. Expressed in lateral root primordia and induced by auxin. SWP1 is involved i…	LATERAL ROOT PRIMORDIUM 1 (LRP1); FUNCTIONS IN: protein homodimerization activity; INVOLVED IN: response to auxin stimulus, root development; LOCATED IN: cellular_component unknown; EXPRESSED IN: 15 plant structures; EXPRESSED DURING: 7 growth stages; CONTAINS InterPro DOMAIN/s: Lateral Root Primordium type 1, C-terminal (InterPro:IPR006511), Zinc finger, Lateral Root Primordium type 1 (InterPro:…
Potri.002G249200.v4.1		-2.40817	9.3014	0	0	-3.17394	9.2126	0	0	-3.88606	9.18994	0	0	-3.93481	9.17243	0	0	-4.69758	9.16144	0	0	YES	YES	YES	YES	YES	2135.1	2122.96	1052.78	415.4	263.06	1087.22	160.11	1119.88	149.94	143.27	91.75	89.59	AT3G07390.1	auxin-responsive family protein	isolated from differential screening of a cDNA library from auxin-treated root culture. sequence does not show homology to any known proteins and is predicted to be extracellular.	Auxin-Induced in Root cultures 12 (AIR12); FUNCTIONS IN: extracellular matrix structural constituent; INVOLVED IN: response to auxin stimulus, lateral root morphogenesis, extracellular matrix organization; LOCATED IN: extracellular region, anchored to plasma membrane, plasma membrane, anchored to membrane; EXPRESSED IN: 26 plant structures; EXPRESSED DURING: 13 growth stages; CONTAINS InterPro DO…
Potri.001G335300.v4.1		-1.12098	9.48511	1.02089e-268	4.25572e-267	-1.12814	9.49703	1.23774e-306	4.54492e-305	-2.76803	9.18207	0	0	-2.61478	9.18853	0	0	-2.16373	9.28827	0	0	YES	YES	YES	YES	YES	820.73	806.19	1017.32	385.43	400.18	736.03	131.48	847.06	144.71	137.09	195.75	202.44	AT5G40780.1	lysine histidine transporter 1	Encodes LHT1 (lysine histidine transporter), a high-affinity transporter for cellular amino acid uptake in both root epidermis and leaf mesophyll.	lysine histidine transporter 1 (LHT1); FUNCTIONS IN: amino acid transmembrane transporter activity; INVOLVED IN: amino acid transport, response to karrikin, amino acid import; LOCATED IN: plasma membrane, membrane; EXPRESSED IN: 22 plant structures; EXPRESSED DURING: 11 growth stages; CONTAINS InterPro DOMAIN/s: Amino acid transporter, transmembrane (InterPro:IPR013057); BEST Arabidopsis thaliana…
Potri.016G125000.v4.1		-1.7058	8.44797	0	0	-1.13101	8.61431	6.31758e-265	1.95693e-263	-2.83355	8.29428	0	0	-1.65186	8.48856	0	0	-2.37882	8.36871	0	0	YES	YES	YES	YES	YES	704.08	680.2	413.47	213.93	339.37	720.14	104.38	821.46	239.86	226.12	145.31	147.36	AT2G41480.1	Peroxidase superfamily protein		Peroxidase superfamily protein; FUNCTIONS IN: peroxidase activity, heme binding; INVOLVED IN: oxidation reduction, response to oxidative stress; EXPRESSED IN: root, leaf; EXPRESSED DURING: LP.04 four leaves visible; CONTAINS InterPro DOMAIN/s: Haem peroxidase (InterPro:IPR010255), Plant peroxidase (InterPro:IPR000823), Peroxidases heam-ligand binding site (InterPro:IPR019793), Peroxidase, active …
Potri.009G149400.v4.1	C2H2	-1.69971	7.76672	0	0	-1.31481	7.8713	2.42603e-288	8.32758e-287	-1.37114	7.89068	0	0	-1.50783	7.83925	0	0	-1.85882	7.78081	0	0	YES	YES	YES	YES	YES	478.62	463.22	391.93	153.53	194.7	677.67	205.93	781.81	174.27	176.11	148.27	137.86	AT3G44750.2	histone deacetylase 3	Encodes a histone deacetylase. Controls the development of adaxial/abaxial leaf polarity. Two lines with RNAi-directed against this gene show reduced Agrobacterium-mediated DNA transformation of the roots.	histone deacetylase 3 (HDA3); CONTAINS InterPro DOMAIN/s: Zinc finger, C2H2-type (InterPro:IPR007087), Nucleoplasmin (InterPro:IPR004301); BEST Arabidopsis thaliana protein match is: histone deacetylase 2B (TAIR:AT5G22650.1).
Potri.005G024800.v4.1		-1.4753	7.35693	3.75668e-282	1.67678e-280	-1.70367	7.2999	0	0	-3.31608	7.09307	0	0	-2.752	7.13606	0	0	-2.46427	7.20023	0	0	YES	YES	YES	YES	YES	458.84	451.02	366.99	162.91	146.46	635.56	50.15	734.56	68.67	74	93.44	88.72	AT3G16640.1	translationally controlled tumor protein	Encodes a protein homologous to translationally controlled tumor protein (TCTP) from Drosophila. In flies, TCTP functions guanine nucleotide exchange factor in the TOR signaling pathway. TCTP is expressed throughout the plant with highest levels seen in meristematic regions of the shoot and root. Loss of function alleles are not transmitted through the male gametophyte due to defects in pollen tu…	translationally controlled tumor protein (TCTP); INVOLVED IN: in 8 processes; LOCATED IN: in 6 components; EXPRESSED IN: 28 plant structures; EXPRESSED DURING: 17 growth stages; CONTAINS InterPro DOMAIN/s: Translationally controlled tumour protein (InterPro:IPR018105), Mss4/translationally controlled tumour-associated TCTP (InterPro:IPR011323), Translationally controlled tumour protein, conserved…
Potri.015G003500.v4.1		-1.14839	7.76197	2.48494e-199	7.13723e-198	-2.9304	7.40112	0	0	-1.93661	7.6023	0	0	-2.58764	7.4728	0	0	-1.40055	7.74144	0	0	YES	YES	YES	YES	YES	438.04	436.58	338.22	203.8	64.31	560.58	122.92	655.16	73.28	80.9	182.42	182.39	AT1G05260.1	Peroxidase superfamily protein	Encodes a cold-inducible cationic peroxidase that is involved in the stress response. In response to low temperature, RCI3 transcripts accumulate in the aerial part and in roots of etiolated seedlings but only in roots of light-grown seedlings.	RARE COLD INDUCIBLE GENE 3 (RCI3); FUNCTIONS IN: peroxidase activity; INVOLVED IN: response to desiccation, response to cold, hyperosmotic salinity response; LOCATED IN: endoplasmic reticulum; EXPRESSED IN: 12 plant structures; EXPRESSED DURING: 4 anthesis, petal differentiation and expansion stage, E expanded cotyledon stage; CONTAINS InterPro DOMAIN/s: Haem peroxidase (InterPro:IPR010255), Plan…
Potri.002G098000.v4.1		-1.47117	9.18258	0	0	-1.95505	9.08	0	0	-2.84095	8.97089	0	0	-2.72937	8.97077	0	0	-2.29686	9.06213	0	0	YES	YES	YES	YES	YES	417.75	417.64	227.55	158.36	115.54	410.65	64.44	550.08	64.83	69.34	92.05	94.05	AT1G78240.2	S-adenosyl-L-methionine-dependent methyltransferases superfamily protein	Encodes TSD2 (TUMOROUS SHOOT DEVELOPMENT2), a putative methyltransferase with an essential role in cell adhesion and coordinated plant development.	TUMOROUS SHOOT DEVELOPMENT 2 (TSD2); FUNCTIONS IN: methyltransferase activity; INVOLVED IN: shoot development, homogalacturonan biosynthetic process, response to cytokinin stimulus, root development; LOCATED IN: Golgi apparatus; EXPRESSED IN: 31 plant structures; EXPRESSED DURING: 13 growth stages; CONTAINS InterPro DOMAIN/s: Protein of unknown function DUF248, methyltransferase putative (InterPr…
Potri.009G025200.v4.1		-1.93446	5.57384	9.35895e-177	2.3417e-175	-3.09957	5.36747	0	0	-2.18023	5.55755	8.60299e-223	1.61743e-221	-3.30349	5.38531	0	0	-1.72667	5.65265	9.3174e-169	1.27039e-167	YES	YES	YES	YES	YES	406.16	378.74	225.68	110.47	47.99	399.21	85.92	518.31	43.32	38.54	128.53	137.67	AT2G18370.1	Bifunctional inhibitor/lipid-transfer protein/seed storage 2S albumin superfamily protein	Predicted to encode a PR (pathogenesis-related) protein. Belongs to the lipid transfer protein (PR-14) family with the following members: At2g38540/LTP1, At2g38530/LTP2, At5g59320/LTP3, At5g59310/LTP4, At3g51600/LTP5, At3g08770/LTP6, At2g15050/LTP7, At2g18370/LTP8, At2g15325/LTP9, At5g01870/LTP10, At4g33355/LTP11, At3g51590/LTP12, At5g44265/LTP13, At5g62065/LTP14, At4g08530/LTP15.	Bifunctional inhibitor/lipid-transfer protein/seed storage 2S albumin superfamily protein; FUNCTIONS IN: lipid binding; INVOLVED IN: lipid transport; LOCATED IN: endomembrane system; EXPRESSED IN: leaf whorl, embryo, hypocotyl, male gametophyte, root; EXPRESSED DURING: C globular stage; CONTAINS InterPro DOMAIN/s: Bifunctional inhibitor/plant lipid transfer protein/seed storage (InterPro:IPR01614…
Potri.013G102700.v4.1		-1.63041	7.85889	0	0	-1.9777	7.78358	0	0	-2.67571	7.70621	0	0	-2.59206	7.7011	0	0	-4.12868	7.58132	0	0	YES	YES	YES	YES	YES	378.9	370.25	216.07	124.82	100.49	347.6	64.93	412.65	65.21	66.55	22.31	24.63	AT1G76690.1	12-oxophytodienoate reductase 2	Encodes one of the closely related 12-oxophytodienoic acid reductases. This enzyme is not expected to participate in jasmonic acid biosynthesis because during in vitro assays, it shows very little activity with the naturally occurring OPDA isomer. Shows activity towards 2,4,6-trinitrotoluene. Expressed predominately in root. Predicted to be a cytosolic protein.	12-oxophytodienoate reductase 2 (OPR2); CONTAINS InterPro DOMAIN/s: Aldolase-type TIM barrel (InterPro:IPR013785), NADH:flavin oxidoreductase/NADH oxidase, N-terminal (InterPro:IPR001155); BEST Arabidopsis thaliana protein match is: 12-oxophytodienoate reductase 1 (TAIR:AT1G76680.1); Has 13197 Blast hits to 13176 proteins in 2056 species: Archae - 127; Bacteria - 9811; Metazoa - 29; Fungi - 865; …
Potri.007G071100.v4.1		-1.95573	8.05279	0	0	-1.24217	8.23682	1.46016e-294	5.12606e-293	-1.51449	8.19501	0	0	-1.603	8.15831	0	0	-2.09888	8.07534	0	0	YES	YES	YES	YES	YES	256.78	260.69	204.92	67.74	116.93	338.02	101.63	385.68	87.39	93.93	67.72	64.74	AT1G48920.1	nucleolin like 1	Encodes ATNUC-L1 (NUCLEOLIN LIKE 1), the predominant form of the two nucleolin proteins found in Arabidopsis. This protein is involved in rRNA processing, ribosome biosynthesis, and vascular pattern formation. PARL1 localizes to the nucleolus and parl1 mutants accumulate elevated levels of the unspliced 35S pre-rRNA. parl1 mutants also have defects in cotyledon, leaf, sepal, and petal vein patter…	nucleolin like 1 (NUC-L1); FUNCTIONS IN: nucleotide binding, nucleic acid binding; INVOLVED IN: in 12 processes; LOCATED IN: nucleolus; EXPRESSED IN: 33 plant structures; EXPRESSED DURING: 13 growth stages; CONTAINS InterPro DOMAIN/s: RNA recognition motif, RNP-1 (InterPro:IPR000504), Nucleotide-binding, alpha-beta plait (InterPro:IPR012677); BEST Arabidopsis thaliana protein match is: nucleolin …
Potri.003G092200.v4.1	bHLH	-1.18943	8.17709	2.14285e-238	7.69091e-237	-1.72552	8.04021	0	0	-2.43612	7.9406	0	0	-2.3246	7.9429	0	0	-2.45466	7.94645	0	0	YES	YES	YES	YES	YES	191.84	197.1	204.48	89.23	63.88	327.1	40.31	253.03	39.04	43.75	38.54	39.13	AT1G32640.1	Basic helix-loop-helix (bHLH) DNA-binding family protein	Encodes a MYC-related transcriptional activator with a typical DNA binding domain of a basic helix-loop-helix leucine zipper motif. Binds to an extended G-Box promoter motif. Its transcription is induced by dehydration stress and ABA treatment. Negative regulator of blue lightmediated photomorphogenic growth and blue and far-red-lightregulated gene expression. Positive regulator of lateral root f…	MYC2; FUNCTIONS IN: DNA binding, transcription activator activity, sequence-specific DNA binding transcription factor activity; INVOLVED IN: in 13 processes; LOCATED IN: nucleus; EXPRESSED IN: 26 plant structures; EXPRESSED DURING: 13 growth stages; CONTAINS InterPro DOMAIN/s: Helix-loop-helix DNA-binding domain (InterPro:IPR001092), Helix-loop-helix DNA-binding (InterPro:IPR011598); BEST Arabido…
Potri.012G134000.v4.1	ERF	-5.86015	6.78735	0	0	-3.57502	6.85638	0	0	-7.44383	6.80058	0	0	-6.37408	6.78775	0	0	-4.61802	6.84893	0	0	YES	YES	YES	YES	YES	184.65	179.42	179.45	2.69	17.59	281.93	0.84	237.26	1.66	3.07	8.98	7.34	AT5G52020.1	Integrase-type DNA-binding superfamily protein	encodes a member of the DREB subfamily A-4 of ERF/AP2 transcription factor family. The protein contains one AP2 domain. There are 17 members in this subfamily including TINY.	Integrase-type DNA-binding superfamily protein; FUNCTIONS IN: DNA binding, transcription activator activity, sequence-specific DNA binding transcription factor activity; INVOLVED IN: defense response to fungus; LOCATED IN: chloroplast; EXPRESSED IN: root, flower; EXPRESSED DURING: petal differentiation and expansion stage; CONTAINS InterPro DOMAIN/s: DNA-binding, integrase-type (InterPro:IPR01617…
Potri.010G191000.v4.1		-1.90124	8.62574	0	0	-2.83229	8.47798	0	0	-3.17108	8.47776	0	0	-3.26387	8.45318	0	0	-2.90746	8.51634	0	0	YES	YES	YES	YES	YES	164.67	162.13	174.87	45.88	24.86	263.64	21.09	219.62	19.03	17.15	22.58	24.96	AT2G38120.1	Transmembrane amino acid transporter family protein	Encodes an auxin influx transporter. AUX1 resides at the apical plasma membrane of protophloem cells and at highly dynamic subpopulations of Golgi apparatus and endosomes in all cell types. AUX1 action in the lateral root cap and/or epidermal cells influences lateral root initiation and positioning.	AUXIN RESISTANT 1 (AUX1); CONTAINS InterPro DOMAIN/s: Amino acid transporter, transmembrane (InterPro:IPR013057); BEST Arabidopsis thaliana protein match is: like AUXIN RESISTANT 1 (TAIR:AT5G01240.1); Has 1256 Blast hits to 1251 proteins in 143 species: Archae - 0; Bacteria - 0; Metazoa - 116; Fungi - 283; Plants - 825; Viruses - 0; Other Eukaryotes - 32 (source: NCBI BLink).
Potri.018G127800.v4.1		-1.12402	6.55082	1.06387e-119	1.76038e-118	-2.57935	6.21741	0	0	-3.01775	6.21556	0	0	-3.23865	6.17064	0	0	-3.00122	6.2161	0	0	YES	YES	YES	YES	YES	162.43	168.2	155.4	78.9	29.23	252.12	22.03	211.01	18.73	18.33	20.97	24.31	AT1G04550.2	AUX/IAA transcriptional regulator family protein	IAA12/BDL plays a role in auxin-mediated processes of apical-basal patterning in the embryo. bdl mutants lack a primary root meristem	indole-3-acetic acid inducible 12 (IAA12); FUNCTIONS IN: transcription repressor activity, sequence-specific DNA binding transcription factor activity; INVOLVED IN: xylem and phloem pattern formation, response to auxin stimulus, embryonic pattern specification, root development; LOCATED IN: nucleus; EXPRESSED IN: 22 plant structures; EXPRESSED DURING: 13 growth stages; CONTAINS InterPro DOMAIN/s:…
Potri.003G058900.v4.1		-1.11748	7.47963	2.28872e-172	5.54935e-171	-1.18403	7.4639	2.25014e-204	5.24505e-203	-1.40608	7.43614	0	5.13125e-308	-1.50846	7.39314	6.10208e-290	1.77874e-288	-1.39484	7.4496	0	0	YES	YES	YES	YES	YES	141.44	143.83	149.43	71.49	64.01	241.2	58.72	204.25	54.06	52.51	60.2	58.7	AT1G80300.1	nucleotide transporter 1		nucleotide transporter 1 (NTT1); FUNCTIONS IN: ATP:ADP antiporter activity; INVOLVED IN: transport; LOCATED IN: membrane, chloroplast envelope; EXPRESSED IN: stem, root, guard cell, callus, leaf; EXPRESSED DURING: seedling growth; CONTAINS InterPro DOMAIN/s: ADP/ATP carrier protein (InterPro:IPR004667); BEST Arabidopsis thaliana protein match is: TLC ATP/ADP transporter (TAIR:AT1G15500.1); Has 78…
Potri.006G102800.v4.1		-1.00653	6.76128	3.84655e-107	5.6055e-106	-1.21028	6.69782	1.99519e-161	3.61726e-160	-2.36263	6.47699	0	0	-1.66709	6.5968	1.52427e-256	3.83968e-255	-1.39973	6.69085	2.47609e-236	4.82611e-235	YES	YES	YES	YES	YES	139.24	138.88	147.93	68.74	64.97	210.73	30.39	193.85	49.88	42.72	53.95	61.51	AT2G38290.1	ammonium transporter 2	encodes a high-affinity ammonium transporter, which is expressed in shoot and root. Expression in root and shoot is under nitrogen and carbon dioxide regulation, respectively.	ammonium transporter 2 (AMT2); FUNCTIONS IN: ammonium transmembrane transporter activity, high affinity secondary active ammonium transmembrane transporter activity; INVOLVED IN: ammonium transport, response to nematode, cellular response to nitrogen starvation; LOCATED IN: plasma membrane; EXPRESSED IN: 24 plant structures; EXPRESSED DURING: 13 growth stages; CONTAINS InterPro DOMAIN/s: Ammonium…
Potri.017G080700.v4.1		-1.33713	6.06974	9.73843e-131	1.75872e-129	-1.01512	6.16441	6.01179e-87	5.90976e-86	-1.09369	6.17882	2.69115e-103	2.39331e-102	-1.08571	6.16502	3.1502e-91	2.62457e-90	-1.38506	6.09931	5.26963e-161	6.88921e-160	YES	YES	YES	YES	YES	134.01	132.71	147.08	54.69	66.55	184.07	71.55	154.61	66.21	66.76	59.32	53.29	AT1G18800.1	NAP1-related protein 2	Double nrp1-1 nrp2-1 mutants show arrest of cell cycle progression at G2/M and disordered cellular organization occurred in root tips. Localize in the nucleus and can form homomeric and heteromeric protein complexes with NRP1. Bind histones Histone2A and Histone2B and associate with chromatin in vivo.	NAP1-related protein 2 (NRP2); FUNCTIONS IN: chromatin binding, histone binding, DNA binding; INVOLVED IN: cell proliferation, cell differentiation, nucleosome assembly, lateral root formation; LOCATED IN: nucleus, cytoplasm; EXPRESSED IN: 24 plant structures; EXPRESSED DURING: 14 growth stages; CONTAINS InterPro DOMAIN/s: Nucleosome assembly protein (NAP) (InterPro:IPR002164); BEST Arabidopsis t…
Potri.006G048200.v4.1		-1.55138	6.53388	3.55861e-219	1.16328e-217	-1.35265	6.58203	3.55555e-185	7.36871e-184	-3.18009	6.29996	0	0	-2.10659	6.42991	0	0	-2.1788	6.43899	0	0	YES	YES	YES	YES	YES	133.44	134.52	141.63	47.45	52.79	178.79	15.65	143.83	32.31	33.75	33	32.02	AT2G15490.1	UDP-glycosyltransferase 73B4		UDP-glycosyltransferase 73B4 (UGT73B4); FUNCTIONS IN: quercetin 3-O-glucosyltransferase activity, UDP-glycosyltransferase activity, quercetin 7-O-glucosyltransferase activity, UDP-glucosyltransferase activity, transferase activity, transferring glycosyl groups; INVOLVED IN: response to other organism; LOCATED IN: endomembrane system; EXPRESSED IN: root; CONTAINS InterPro DOMAIN/s: UDP-glucuronosy…
Potri.001G048700.v4.1		-1.17552	8.37216	3.03438e-244	1.11912e-242	-2.05804	8.16032	0	0	-2.39317	8.13866	0	0	-2.06208	8.18171	0	0	-1.39595	8.36386	0	0	YES	YES	YES	YES	YES	132.36	134.99	141.41	61.11	34.3	152.1	27.57	142.5	33.19	35.09	54.45	56.62	AT1G15520.1	pleiotropic drug resistance 12	ABC transporter family involved in ABA transport and resistance to lead. Localizes to plasma membrane. Upregulated by lead. Expressed in leaves, flowers, stomata and roots.	pleiotropic drug resistance 12 (PDR12); CONTAINS InterPro DOMAIN/s: ATPase, AAA+ type, core (InterPro:IPR003593), ABC transporter-like (InterPro:IPR003439), Plant PDR ABC transporter associated (InterPro:IPR013581), ABC-2 type transporter (InterPro:IPR013525); BEST Arabidopsis thaliana protein match is: pleiotropic drug resistance 11 (TAIR:AT1G66950.1); Has 377983 Blast hits to 279992 proteins in…
Potri.008G041400.v4.1		-1.65783	6.90642	9.30527e-295	4.3321e-293	-2.50439	6.73357	0	0	-4.22752	6.62388	0	0	-3.3145	6.66573	0	0	-2.04072	6.86654	0	0	YES	YES	YES	YES	YES	112.52	119.03	140.08	38.36	22.75	150.88	7	134.33	12.65	12.06	29.65	31.96	AT1G61560.1	Seven transmembrane MLO family protein	A member of a large family of seven-transmembrane domain proteins specific to plants, homologs of the barley mildew resistance locus o (MLO) protein. The Arabidopsis genome contains 15 genes encoding MLO proteins, with localization in plasma membrane. Phylogenetic analysis revealed four clades of closely-related AtMLO genes. ATMLO6 belongs to the clade IV, with AtMLO2, AtMLO3 and AtMLO12. The gen…	MILDEW RESISTANCE LOCUS O 6 (MLO6); FUNCTIONS IN: calmodulin binding; INVOLVED IN: defense response to fungus, incompatible interaction, cell death, defense response; LOCATED IN: plasma membrane; EXPRESSED IN: 26 plant structures; EXPRESSED DURING: 8 growth stages; CONTAINS InterPro DOMAIN/s: Mlo-related protein (InterPro:IPR004326); BEST Arabidopsis thaliana protein match is: Seven transmembrane…
Potri.008G038100.v4.1		1.53384	7.69338	0	0	1.56643	7.75095	0	0	1.77299	7.92633	0	0	1.57941	7.77067	0	0	1.23637	7.55356	9.39919e-278	2.17887e-276	YES	YES	YES	YES	YES	112.19	111.29	136.98	333.5	362.63	145.63	429.11	132.33	356.43	351.73	292.49	285.99	AT5G03300.1	adenosine kinase 2	Encodes adenosine kinase 2 (ADK2), a typical, constitutively expressed housekeeping enzyme. Shows a high sequence identity with ADK1. Involved in salvage synthesis of adenylates and methyl recycling. Enzyme activity is substantially inhibited in roots, siliques and dry seeds by an unknown compound. May contribute to cytokinin interconversion.	adenosine kinase 2 (ADK2); FUNCTIONS IN: adenosine kinase activity, copper ion binding, kinase activity; INVOLVED IN: adenosine salvage; LOCATED IN: plasma membrane; EXPRESSED IN: 33 plant structures; EXPRESSED DURING: 16 growth stages; CONTAINS InterPro DOMAIN/s: Carbohydrate/purine kinase (InterPro:IPR011611), Carbohydrate/puine kinase, PfkB, conserved site (InterPro:IPR002173), Adenosine kinas…
Potri.008G026400.v4.1		-2.01557	6.57964	0	0	-3.45889	6.36645	0	0	-2.88367	6.47943	0	0	-3.58706	6.38989	0	0	-4.23334	6.36868	0	0	YES	YES	YES	YES	YES	95.63	96.31	130.33	25.98	8.73	128.49	15.36	132.3	9.01	7.9	5.47	5.69	AT5G03760.1	Nucleotide-diphospho-sugar transferases superfamily protein	encodes a beta-mannan synthase that is required for agrobacterium-mediated plant genetic transformation involves a complex interaction between the bacterium and the host plant. 3' UTR is involved in transcriptional regulation and the gene is expressed in the elongation zone of the root.	ATCSLA09; CONTAINS InterPro DOMAIN/s: Glycosyl transferase, family 2 (InterPro:IPR001173); BEST Arabidopsis thaliana protein match is: cellulose synthase-like A02 (TAIR:AT5G22740.1); Has 1807 Blast hits to 1807 proteins in 277 species: Archae - 0; Bacteria - 0; Metazoa - 736; Fungi - 347; Plants - 385; Viruses - 0; Other Eukaryotes - 339 (source: NCBI BLink).
Potri.003G137400.v4.1		-1.34592	8.13352	1.04983e-298	4.98978e-297	-1.43827	8.11497	0	0	-1.66382	8.09279	0	0	-2.31474	7.94631	0	0	-2.17756	7.99524	0	0	YES	YES	YES	YES	YES	92.54	95.41	129	39.74	35.45	122.54	33.01	128.13	18.34	22.06	23.19	22.27	AT5G41790.1	COP1-interactive protein 1	encodes a protein that physically interacts specifically with the putative coiled-coil region of COP1 in vitro. In hypocotyl and cotyledon protoplasts, it is associated to the cytoskeleton, but not in the root. expression is not regulated by light.	COP1-interactive protein 1 (CIP1); FUNCTIONS IN: protein binding; INVOLVED IN: regulation of protein import into nucleus; LOCATED IN: cytoskeleton, plasma membrane, chloroplast, vacuole; EXPRESSED IN: 24 plant structures; EXPRESSED DURING: 13 growth stages; CONTAINS InterPro DOMAIN/s: Prefoldin (InterPro:IPR009053); BEST Arabidopsis thaliana protein match is: myosin heavy chain-related (TAIR:AT1G…
Potri.008G129400.v4.1		-1.30671	7.07223	6.60352e-201	1.92835e-199	-1.73991	6.95788	0	0	-1.76432	6.99445	0	0	-1.75676	6.97946	0	0	-2.27993	6.89757	0	0	YES	YES	YES	YES	YES	74.03	74.04	126.28	32	23.5	118.22	25.39	125.76	22.64	24.06	15.96	17.35	AT1G70940.1	Auxin efflux carrier family protein	A regulator of auxin efflux and involved in differential growth. PIN3 is expressed in gravity-sensing tissues, with PIN3 protein accumulating predominantly at the lateral cell surface. PIN3 localizes to the plasma membrane and to vesicles. In roots, PIN3 is expressed without pronounced polarity in tiers two and three of the columella cells, at the basal side of vascular cells, and to the lateral …	PIN-FORMED 3 (PIN3); FUNCTIONS IN: auxin:hydrogen symporter activity, transporter activity; INVOLVED IN: in 8 processes; LOCATED IN: lateral plasma membrane, plasma membrane, vesicle membrane, cell surface; EXPRESSED IN: 26 plant structures; EXPRESSED DURING: 13 growth stages; CONTAINS InterPro DOMAIN/s: Auxin efflux carrier, subgroup (InterPro:IPR014024), Auxin efflux carrier (InterPro:IPR004776…
Potri.005G153200.v4.1		-1.34732	5.56563	6.89563e-100	9.30849e-99	-1.25372	5.58242	1.28473e-94	1.37176e-93	-1.26592	5.62375	1.65697e-96	1.38566e-95	-1.48057	5.54527	1.65518e-115	1.74818e-114	-1.45031	5.57691	1.93681e-126	1.9898e-125	YES	YES	YES	YES	YES	69.47	66.27	98.81	26.16	30.75	116.19	30.88	111.91	26.36	25.15	27.16	27.36	AT1G09700.1	dsRNA-binding domain-like superfamily protein	Encodes a nuclear dsRNA binding protein. Involved in mRNA cleavage. The mutant is characterized by shorter stature, delayed flowering, leaf hyponasty, reduced fertility, decreased rate of root growth, and an altered root gravitropic response. It also exhibits less sensitivity to auxin and cytokinin.	HYPONASTIC LEAVES 1 (HYL1); CONTAINS InterPro DOMAIN/s: Double-stranded RNA-binding (InterPro:IPR001159), Double-stranded RNA-binding-like (InterPro:IPR014720); BEST Arabidopsis thaliana protein match is: dsRNA-binding protein 2 (TAIR:AT2G28380.1); Has 992 Blast hits to 893 proteins in 320 species: Archae - 14; Bacteria - 506; Metazoa - 117; Fungi - 6; Plants - 270; Viruses - 0; Other Eukaryotes …
Potri.011G037100.v4.1		-1.03497	6.65717	3.04216e-107	4.4504e-106	-1.49996	6.5178	9.63832e-222	2.45676e-220	-1.85539	6.47653	0	0	-1.83148	6.46327	9.30961e-287	2.68712e-285	-2.4361	6.37134	0	0	YES	YES	YES	YES	YES	68.8	65.92	98.5	35.99	25.61	103.53	20.26	111.83	20.37	19.86	13.1	14.1	AT4G21380.1	receptor kinase 3	encodes a putative receptor-like serine/threonine protein kinases that is similar to Brassica self-incompatibility (S) locus. Expressed in root. Shoot expression limited to limited to the root-hypocotyl transition zone and at the base of lateral roots as well as in axillary buds, and pedicels.	receptor kinase 3 (RK3); FUNCTIONS IN: transmembrane receptor protein serine/threonine kinase activity, kinase activity; INVOLVED IN: protein amino acid phosphorylation, recognition of pollen; LOCATED IN: plasma membrane, vacuole; EXPRESSED IN: 15 plant structures; EXPRESSED DURING: 12 growth stages; CONTAINS InterPro DOMAIN/s: Curculin-like (mannose-binding) lectin (InterPro:IPR001480), Protein …
Potri.014G027200.v4.1		-1.33835	5.5484	1.64502e-97	2.16155e-96	-1.05811	5.62544	1.48498e-70	1.19969e-69	-1.38434	5.57056	1.81562e-110	1.71641e-109	-1.43948	5.53666	1.22508e-108	1.20779e-107	-1.63594	5.50875	2.16635e-140	2.47676e-139	YES	YES	YES	YES	YES	67.95	69.12	97.57	26.73	35.19	98.08	28.93	109.3	26.23	27.41	24.75	23.73	AT3G49180.1	Transducin/WD40 repeat-like superfamily protein		ROOT INITIATION DEFECTIVE 3 (RID3); CONTAINS InterPro DOMAIN/s: WD40 repeat 2 (InterPro:IPR019782), WD40 repeat, conserved site (InterPro:IPR019775), WD40 repeat (InterPro:IPR001680), G-protein beta WD-40 repeat, region (InterPro:IPR020472), WD40 repeat-like-containing domain (InterPro:IPR011046), WD40-repeat-containing domain (InterPro:IPR017986), WD40/YVTN repeat-like-containing domain (InterPr…
Potri.014G132500.v4.1		-1.76556	6.47611	2.06896e-271	8.72071e-270	-1.15496	6.6344	5.53405e-142	8.72865e-141	-1.6725	6.53315	2.40391e-282	5.81285e-281	-1.78872	6.48807	1.81104e-277	5.042e-276	-1.91769	6.48309	0	0	YES	YES	YES	YES	YES	66.88	69.86	97.25	20.95	32.43	92	23.6	108.93	21.22	20.88	19.2	20.4	AT4G13420.1	high affinity K+ transporter 5	Encodes a protein of the KUP/HAK/KT potassium channel class that is upregulated in the roots by K levels.	high affinity K+ transporter 5 (HAK5); FUNCTIONS IN: potassium ion transmembrane transporter activity, potassium:sodium symporter activity; INVOLVED IN: potassium ion transport; LOCATED IN: membrane; EXPRESSED IN: 15 plant structures; EXPRESSED DURING: 8 growth stages; CONTAINS InterPro DOMAIN/s: Potassium uptake protein, kup (InterPro:IPR018519), K+ potassium transporter (InterPro:IPR003855); BE…
Potri.005G081300.v4.1		-2.73193	4.54136	7.85265e-151	1.63374e-149	-2.71482	4.5008	2.62214e-167	4.93141e-166	-3.99528	4.45136	9.34383e-239	1.88219e-237	-2.9479	4.51152	1.19864e-174	1.94835e-173	-4.29378	4.42339	4.74084e-267	1.05429e-265	YES	YES	YES	YES	YES	64.38	68.13	88.36	8.89	10.32	89.44	4.16	106.75	9.68	8.38	3.7	3.73	AT2G01150.1	RING-H2 finger protein 2B	Encodes a RING-H2 finger protein that is expressed in vascular tissue, root tips, embryos and pistils.	RING-H2 finger protein 2B (RHA2B); CONTAINS InterPro DOMAIN/s: Zinc finger, RING-type (InterPro:IPR001841), Zinc finger, C3HC4 RING-type (InterPro:IPR018957); BEST Arabidopsis thaliana protein match is: RING-H2 finger A2A (TAIR:AT1G15100.1); Has 8536 Blast hits to 8514 proteins in 269 species: Archae - 0; Bacteria - 0; Metazoa - 2151; Fungi - 713; Plants - 4534; Viruses - 16; Other Eukaryotes - 1…
Potri.009G043700.v4.1		-2.92156	5.42169	5.02923e-298	2.3804e-296	-4.1509	5.28038	0	0	-1.31808	5.75236	4.20334e-113	4.0389e-112	-2.71805	5.44881	8.35829e-276	2.2998e-274	-1.26037	5.77544	1.57955e-109	1.43189e-108	YES	YES	YES	YES	YES	64.27	59.77	87.03	8.65	3.85	85.52	28.13	98.74	10.12	9.87	27.92	28.82	AT5G58860.1	cytochrome P450, family 86, subfamily A, polypeptide 1	Encodes a member of the CYP86A subfamily of cytochrome p450 genes. Expressed significantly only in root tissue.	cytochrome P450, family 86, subfamily A, polypeptide 1 (CYP86A1); FUNCTIONS IN: alkane 1-monooxygenase activity, oxygen binding; INVOLVED IN: fatty acid metabolic process, suberin biosynthetic process; LOCATED IN: vacuole; EXPRESSED IN: hypocotyl, root; CONTAINS InterPro DOMAIN/s: Cytochrome P450 (InterPro:IPR001128), Cytochrome P450, E-class, group I (InterPro:IPR002401), Cytochrome P450, conser…
Potri.013G102800.v4.1		-3.09678	4.7423	2.51888e-202	7.42238e-201	-3.67682	4.64272	9.3707e-267	2.93404e-265	-3.72609	4.71021	4.85958e-263	1.08642e-261	-3.49496	4.70016	5.26744e-242	1.25191e-240	-3.27077	4.73866	7.96891e-246	1.63026e-244	YES	YES	YES	YES	YES	63.89	58.45	84.69	8.97	5.08	83.77	5.2	98.45	6.24	5.14	7.47	6.47	AT1G76690.1	12-oxophytodienoate reductase 2	Encodes one of the closely related 12-oxophytodienoic acid reductases. This enzyme is not expected to participate in jasmonic acid biosynthesis because during in vitro assays, it shows very little activity with the naturally occurring OPDA isomer. Shows activity towards 2,4,6-trinitrotoluene. Expressed predominately in root. Predicted to be a cytosolic protein.	12-oxophytodienoate reductase 2 (OPR2); CONTAINS InterPro DOMAIN/s: Aldolase-type TIM barrel (InterPro:IPR013785), NADH:flavin oxidoreductase/NADH oxidase, N-terminal (InterPro:IPR001155); BEST Arabidopsis thaliana protein match is: 12-oxophytodienoate reductase 1 (TAIR:AT1G76680.1); Has 13197 Blast hits to 13176 proteins in 2056 species: Archae - 127; Bacteria - 9811; Metazoa - 29; Fungi - 865; …
Potri.010G053800.v4.1		-1.70772	5.40815	7.53284e-130	1.35287e-128	-2.50847	5.23005	5.6777e-238	1.57359e-236	-2.00182	5.3769	2.25892e-172	3.27396e-171	-2.96764	5.20544	5.47792e-269	1.46283e-267	-1.48127	5.50011	2.36995e-117	2.26917e-116	YES	YES	YES	YES	YES	61.84	63.02	82.5	19.26	11.71	77.92	16.77	92.38	8.54	8.33	25.26	23.88	AT1G24430.1	HXXXD-type acyl-transferase family protein		HXXXD-type acyl-transferase family protein; FUNCTIONS IN: transferase activity, transferring acyl groups other than amino-acyl groups, transferase activity; INVOLVED IN: N-terminal protein myristoylation; LOCATED IN: cellular_component unknown; EXPRESSED IN: hypocotyl, root; CONTAINS InterPro DOMAIN/s: Transferase (InterPro:IPR003480); BEST Arabidopsis thaliana protein match is: HXXXD-type acyl-t…
Potri.012G084700.v4.1		-1.26219	4.50998	1.32351e-42	8.03764e-42	-1.24566	4.49885	1.91309e-46	1.06965e-45	-1.76474	4.41369	2.51982e-76	1.71908e-75	-1.33507	4.50188	7.89072e-49	3.84624e-48	-1.40903	4.50422	5.64641e-58	2.97256e-57	YES	YES	YES	YES	YES	60.25	60.26	78.44	22.57	27.88	74.76	20.38	87.61	25.01	25.37	23.77	26.22	AT5G47740.1	Adenine nucleotide alpha hydrolases-like superfamily protein		Adenine nucleotide alpha hydrolases-like superfamily protein; FUNCTIONS IN: molecular_function unknown; INVOLVED IN: response to stress; LOCATED IN: cellular_component unknown; EXPRESSED IN: root; CONTAINS InterPro DOMAIN/s: UspA (InterPro:IPR006016), Rossmann-like alpha/beta/alpha sandwich fold (InterPro:IPR014729); BEST Arabidopsis thaliana protein match is: U-box domain-containing protein kina…
Potri.014G183800.v4.1		-2.3557	4.8905	1.94276e-153	4.13659e-152	-4.42222	4.65304	0	0	-1.39923	5.12051	8.26776e-80	5.85548e-79	-2.81084	4.82618	7.43233e-199	1.39042e-197	-1.45707	5.10836	1.13301e-89	8.53603e-89	YES	YES	YES	YES	YES	54.21	53.61	75.88	13.08	2.94	73.63	23.95	82.98	8.91	7.26	20.11	22.95	AT2G16230.1	O-Glycosyl hydrolases family 17 protein		O-Glycosyl hydrolases family 17 protein; FUNCTIONS IN: cation binding, hydrolase activity, hydrolyzing O-glycosyl compounds, catalytic activity; INVOLVED IN: carbohydrate metabolic process; LOCATED IN: endomembrane system; EXPRESSED IN: root; CONTAINS InterPro DOMAIN/s: X8 (InterPro:IPR012946), Glycoside hydrolase, catalytic core (InterPro:IPR017853), Glycoside hydrolase, family 17 (InterPro:IPR0…
Potri.003G111500.v4.1		-1.46298	5.55333	2.38851e-108	3.53515e-107	-1.86233	5.43961	2.48844e-167	4.6914e-166	-2.42043	5.38956	5.56096e-234	1.09844e-232	-1.85346	5.47304	4.59664e-154	6.58545e-153	-1.43082	5.60062	8.3722e-125	8.52673e-124	YES	YES	YES	YES	YES	52.21	53.83	74.8	20.45	15.82	70.92	11.03	75.27	16.43	14.65	21.99	21.18	AT1G12110.1	nitrate transporter 1.1	Encodes NRT1.1 (CHL1), a dual-affinity nitrate transporter. The protein is expressed in guard cells and function in stomatal opening. Mutants have less transpiration and are more tolerant to drought. Expressed in lateral roots. Involved in nitrate signaling which enables the plant root system to detect and exploit nitrate-rich soil patches. Comparing to the wild type, the mutant displays a strong…	nitrate transporter 1.1 (NRT1.1); FUNCTIONS IN: transporter activity, nitrate transmembrane transporter activity; INVOLVED IN: response to water deprivation, nitrate transport, response to nitrate; LOCATED IN: plasma membrane; EXPRESSED IN: 25 plant structures; EXPRESSED DURING: 12 growth stages; CONTAINS InterPro DOMAIN/s: PTR2 family proton/oligopeptide symporter, conserved site (InterPro:IPR01…
Potri.001G249700.v4.1		-2.77083	5.22942	1.31412e-245	4.87038e-244	-3.92194	5.08222	0	0	-1.09157	5.60965	5.34484e-72	3.48195e-71	-2.593	5.25483	6.95972e-230	1.53629e-228	-1.0284	5.63803	6.2922e-68	3.72837e-67	YES	YES	YES	YES	YES	50.48	55.47	74.23	7.48	3.77	66.96	27.05	73.99	9.85	8.75	28.39	28.63	AT5G58860.1	cytochrome P450, family 86, subfamily A, polypeptide 1	Encodes a member of the CYP86A subfamily of cytochrome p450 genes. Expressed significantly only in root tissue.	cytochrome P450, family 86, subfamily A, polypeptide 1 (CYP86A1); FUNCTIONS IN: alkane 1-monooxygenase activity, oxygen binding; INVOLVED IN: fatty acid metabolic process, suberin biosynthetic process; LOCATED IN: vacuole; EXPRESSED IN: hypocotyl, root; CONTAINS InterPro DOMAIN/s: Cytochrome P450 (InterPro:IPR001128), Cytochrome P450, E-class, group I (InterPro:IPR002401), Cytochrome P450, conser…
Potri.006G107600.v4.1		-1.6639	5.71456	3.37329e-162	7.65612e-161	-1.85782	5.65271	1.32647e-188	2.80936e-187	-3.18036	5.5051	0	0	-2.26449	5.60399	1.18394e-230	2.62327e-229	-1.201	5.87925	3.9536e-107	3.51488e-106	YES	YES	YES	YES	YES	47.87	46.77	70.95	14.93	13.12	64.05	6.07	71.66	10.65	10.27	21.26	23.74	AT5G01830.1	ARM repeat superfamily protein		ARM repeat superfamily protein; FUNCTIONS IN: ubiquitin-protein ligase activity, binding; INVOLVED IN: response to chitin; LOCATED IN: ubiquitin ligase complex; EXPRESSED IN: root; CONTAINS InterPro DOMAIN/s: U box domain (InterPro:IPR003613), Armadillo-like helical (InterPro:IPR011989), Armadillo (InterPro:IPR000225), Armadillo-type fold (InterPro:IPR016024); BEST Arabidopsis thaliana protein ma…
Potri.008G088300.v4.1		1.56372	6.36914	4.05766e-209	1.24408e-207	2.56827	7.22247	0	0	2.31728	7.02123	0	0	2.4453	7.12328	0	0	1.85421	6.67603	0	0	YES	YES	YES	YES	YES	47.49	44.14	65.51	140.87	300.66	62.86	249.8	71.18	269.73	258.67	180.8	182.81	AT1G69530.2	expansin A1	Member of Alpha-Expansin Gene Family. Naming convention from the Expansin Working Group (Kende et al, Plant Mol Bio). Involved in the formation of nematode-induced syncytia in roots of Arabidopsis thaliana.	expansin A1 (EXPA1); CONTAINS InterPro DOMAIN/s: Pollen allergen, N-terminal (InterPro:IPR014734), Barwin-related endoglucanase (InterPro:IPR009009), Rare lipoprotein A (InterPro:IPR005132), Expansin (InterPro:IPR002963), Expansin/Lol pI (InterPro:IPR007118), Expansin 45, endoglucanase-like (InterPro:IPR007112), Pollen allergen/expansin, C-terminal (InterPro:IPR007117); BEST Arabidopsis thaliana …
Potri.013G039200.v4.1		-1.71534	3.99268	1.70491e-51	1.22151e-50	-1.18705	4.11154	9.56818e-33	4.11613e-32	-1.50302	4.07215	1.04044e-46	4.79497e-46	-1.6953	4.00254	7.21106e-55	3.8583e-54	-1.70152	4.02286	3.61877e-59	1.93589e-58	YES	YES	YES	YES	YES	44.03	38.02	63.54	13.42	19.42	62.64	14.33	71.11	13.75	12.9	14.02	13.75	AT3G04800.1	translocase inner membrane subunit 23-3		translocase inner membrane subunit 23-3 (TIM23-3); FUNCTIONS IN: protein transporter activity, P-P-bond-hydrolysis-driven protein transmembrane transporter activity; INVOLVED IN: protein transport; LOCATED IN: mitochondrial inner membrane, mitochondrial inner membrane presequence translocase complex; EXPRESSED IN: cotyledon, embryo, root, flower, leaf; EXPRESSED DURING: E expanded cotyledon stage…
Potri.001G019100.v4.1		-2.25251	5.9367	3.08359e-280	1.36561e-278	-2.29553	5.90695	1.46244507778797e-310	0	-2.37586	5.94707	0	0	-2.27473	5.94278	8.27463e-285	2.3652e-283	-2.27641	5.96455	0	0	YES	YES	YES	YES	YES	41.21	40.68	62.71	8.75	8.35	62.34	9.02	70.09	9.28	8.7	10.46	8.13	AT1G63440.1	heavy metal atpase 5	The Arabidopsis P-type ATPase HMA5 is involved in Cu detoxification. hma5 mutant plants exhibit Cu hypersensitivity, which is especially dramatic in roots where HMA5 is mostly expressed.	heavy metal atpase 5 (HMA5); FUNCTIONS IN: ATPase activity, coupled to transmembrane movement of ions, phosphorylative mechanism; INVOLVED IN: detoxification of copper ion, response to copper ion; LOCATED IN: integral to membrane, membrane; EXPRESSED IN: 8 plant structures; EXPRESSED DURING: L mature pollen stage, M germinated pollen stage, 4 anthesis, petal differentiation and expansion stage; C…
Potri.010G105700.v4.1		-2.39491	5.83903	1.80901e-291	8.3028e-290	-2.34456	5.82289	3.41769e-302	1.23346e-300	-2.08791	5.92229	1.56492e-263	3.512e-262	-2.12774	5.894	5.88758e-249	1.43551e-247	-2.12165	5.9172	7.10222e-282	1.68122e-280	YES	YES	YES	YES	YES	39.26	38.62	62.24	7.29	9.13	61.19	9.52	69.06	9.71	9.23	9.87	9.71	AT1G68050.1	flavin-binding, kelch repeat, f box 1	Encodes FKF1, a flavin-binding kelch repeat F box protein, is clock-controlled, regulates transition to flowering. Forms a complex with GI on the CO promoter to regulate CO expression.	flavin-binding, kelch repeat, f box 1 (FKF1); FUNCTIONS IN: ubiquitin-protein ligase activity, signal transducer activity; INVOLVED IN: response to blue light, positive regulation of flower development, circadian rhythm, ubiquitin-dependent protein catabolic process, regulation of transcription; LOCATED IN: cellular_component unknown; EXPRESSED IN: whole plant, root tip, male gametophyte, leaf, p…
Potri.002G186400.v4.1		-1.10188	3.43311	3.7529e-17	1.16208e-16	-1.59531	3.2715	1.65475e-32	7.08042e-32	-3.11661	3.07876	3.8776e-73	2.5567e-72	-4.1368	2.97097	9.8005e-94	8.36951e-93	-4.47234	2.97118	2.23317e-103	1.90884e-102	YES	YES	YES	YES	YES	39.18	41.99	61.28	18.08	12.35	59.76	4.35	65.64	2.2	2.63	1.52	2.45	AT3G62100.1	indole-3-acetic acid inducible 30	Encodes a member of the Aux/IAA family of proteins implicated in auxin signaling. IAA30 lacks the conserved degron (domain II) found in many family members. IAA30 transcripts are induced by auxin treatment and accumulate preferentially in the quiescent center cells of the root meristem. Overexpression of IAA30 leads to defects in gravitropism, root development, root meristem maintenance, and coty…	indole-3-acetic acid inducible 30 (IAA30); FUNCTIONS IN: sequence-specific DNA binding transcription factor activity; INVOLVED IN: gravitropism, response to auxin stimulus, response to cyclopentenone, somatic embryogenesis, root development; LOCATED IN: nucleus, chloroplast; EXPRESSED IN: 16 plant structures; EXPRESSED DURING: 6 growth stages; CONTAINS InterPro DOMAIN/s: Aux/IAA-ARF-dimerisation …
Potri.003G183200.v4.1		-1.17217	6.41639	1.34302e-121	2.24849e-120	-1.51324	6.31468	3.0199e-205	7.07493e-204	-2.82477	6.11774	0	0	-2.2918	6.17458	0	0	-1.63217	6.33461	7.48627e-257	1.6012e-255	YES	YES	YES	YES	YES	35.71	35.35	57.16	16.1	13.19	58.62	5.52	64.71	7.36	8.13	12.23	12.82	AT1G15520.1	pleiotropic drug resistance 12	ABC transporter family involved in ABA transport and resistance to lead. Localizes to plasma membrane. Upregulated by lead. Expressed in leaves, flowers, stomata and roots.	pleiotropic drug resistance 12 (PDR12); CONTAINS InterPro DOMAIN/s: ATPase, AAA+ type, core (InterPro:IPR003593), ABC transporter-like (InterPro:IPR003439), Plant PDR ABC transporter associated (InterPro:IPR013581), ABC-2 type transporter (InterPro:IPR013525); BEST Arabidopsis thaliana protein match is: pleiotropic drug resistance 11 (TAIR:AT1G66950.1); Has 377983 Blast hits to 279992 proteins in…
Potri.019G094100.v4.1		4.81287	8.31479	0	0	4.81213	8.35305	0	0	3.80765	7.41207	0	0	4.26158	7.83415	0	0	3.62177	7.27083	0	0	YES	YES	YES	YES	YES	34.83	36.65	55.05	1029.8	1065.1	58.58	549.24	64.25	737.97	712.43	489.48	481.89	AT3G54420.1	homolog of carrot EP3-3 chitinase	encodes an EP3 chitinase that is expressed during somatic embryogenesis in 'nursing' cells surrounding the embryos but not in embryos themselves. The gene is also expressed in mature pollen and growing pollen tubes until they enter the receptive synergid, but not in endosperm and integuments as in carrot. Post-embryonically, expression is found in hydathodes, stipules, root epidermis and emerging…	homolog of carrot EP3-3 chitinase (EP3); FUNCTIONS IN: chitinase activity; INVOLVED IN: somatic embryogenesis, plant-type hypersensitive response; LOCATED IN: cell wall; EXPRESSED IN: 18 plant structures; EXPRESSED DURING: 6 growth stages; CONTAINS InterPro DOMAIN/s: Chitin-binding, type 1, conserved site (InterPro:IPR018371), Glycoside hydrolase, family 19 (InterPro:IPR016283), Chitin-binding, t…
Potri.011G098500.v4.1		-1.51921	4.39894	1.97672e-54	1.48166e-53	-1.92581	4.27702	1.4336e-84	1.36693e-83	-2.0044	4.31994	1.20189e-88	9.33402e-88	-1.60827	4.38539	4.18896e-63	2.50986e-62	-1.61155	4.40696	1.73051e-68	1.03137e-67	YES	YES	YES	YES	YES	34.24	34.29	54.69	12.05	10.94	55.61	10.98	64.04	12.56	11.19	13.13	11.57	AT4G21160.4	Calcium-dependent ARF-type GTPase activating protein family	ADP-ribosylation factor GTPase-activating protein containing zinc finger and C2 domains and a novel PI-3-P-binding protein region. Binds PI-3-P. Highest expression levels in flowering tissue, rosettes and roots. A member of ARF GAP domain (AGD), A thaliana has 15 members, grouped into four classes.	ZAC; FUNCTIONS IN: phospholipid binding, ARF GTPase activator activity; INVOLVED IN: intracellular protein transport; LOCATED IN: Golgi apparatus, plasma membrane, vacuole, membrane; EXPRESSED IN: 26 plant structures; EXPRESSED DURING: 15 growth stages; CONTAINS InterPro DOMAIN/s: Arf GTPase activating protein (InterPro:IPR001164), C2 membrane targeting protein (InterPro:IPR018029), C2 calcium/li…
Potri.016G089500.v4.1		2.13821	6.02673	2.20286e-279	9.71783e-278	4.45319	8.15656	0	0	4.5438	8.25708	0	0	4.38022	8.09409	0	0	3.49023	7.29678	0	0	YES	YES	YES	YES	YES	32.35	31.66	53.31	142.52	766.83	53.36	820.61	60.46	715.33	695.75	392.68	398.55	AT2G37170.1	plasma membrane intrinsic protein 2	a member of the plasma membrane intrinsic protein subfamily PIP2. localizes to the plasma membrane and exhibits water transport activity in Xenopus oocyte. expressed specifically in the vascular bundles and protein level increases slightly during leaf dev	plasma membrane intrinsic protein 2 (PIP2B); FUNCTIONS IN: water channel activity; INVOLVED IN: response to water deprivation, response to salt stress, transport, water transport; LOCATED IN: plasma membrane, chloroplast, membrane; EXPRESSED IN: root, cultured cell, callus; EXPRESSED DURING: seedling growth; CONTAINS InterPro DOMAIN/s: Major intrinsic protein, conserved site (InterPro:IPR022357),…
Potri.007G108200.v4.1		-1.36192	4.64003	1.91137e-52	1.39314e-51	-1.65959	4.54139	7.77201e-79	6.91542e-78	-1.67561	4.59202	5.97049e-78	4.15556e-77	-1.85979	4.52795	4.87891e-88	3.93403e-87	-2.01621	4.51646	1.21228e-106	1.07208e-105	YES	YES	YES	YES	YES	32.24	32.93	50.7	14.17	10.25	52.81	10.54	59.94	10.01	8.99	8.98	8.71	AT5G64630.2	Transducin/WD40 repeat-like superfamily protein	Chromatin Assembly Factor-1 (CAF-1) p60 subunit. Involved in organization of the shoot and root apical meristems. In Arabidopsis, the three CAF-1 subunits are encoded by FAS1, FAS2 and, most likely, MSI1, respectively. Mutations in FAS1 or FAS2 lead to increased frequency of homologous recombination and T-DNA integration in Arabidopsis.	FASCIATA 2 (FAS2); CONTAINS InterPro DOMAIN/s: WD40 repeat 2 (InterPro:IPR019782), WD40 repeat-like-containing domain (InterPro:IPR011046), WD40 repeat, conserved site (InterPro:IPR019775), WD40-repeat-containing domain (InterPro:IPR017986), WD40/YVTN repeat-like-containing domain (InterPro:IPR015943), WD40 repeat (InterPro:IPR001680), WD40 repeat, subgroup (InterPro:IPR019781); BEST Arabidopsis …
Potri.001G234600.v4.1		-3.63506	4.91084	7.31158e-276	3.14606e-274	-1.12977	5.31445	1.2121e-66	9.31491e-66	-5.4042	4.85479	0	0	-3.74647	4.89666	1.1432e-294	3.42132e-293	-3.23439	4.95804	2.56505e-278	5.9638e-277	YES	YES	YES	YES	YES	32.12	33.06	49.41	2.7	15.82	52.03	0.77	59.34	2.5	2.66	3.62	3.94	AT2G39380.1	exocyst subunit exo70 family protein H2	A member of EXO70 gene family, putative exocyst subunits, conserved in land plants. Arabidopsis thaliana contains 23 putative EXO70 genes, which can be classified into eight clusters on the phylogenetic tree.	exocyst subunit exo70 family protein H2 (EXO70H2); INVOLVED IN: exocytosis, vesicle docking involved in exocytosis; LOCATED IN: exocyst; EXPRESSED IN: leaf apex, hypocotyl, root, stamen; EXPRESSED DURING: 4 anthesis; CONTAINS InterPro DOMAIN/s: Exo70 exocyst complex subunit (InterPro:IPR004140); BEST Arabidopsis thaliana protein match is: exocyst subunit exo70 family protein H1 (TAIR:AT3G55150.1)…
Potri.003G134600.v4.1		5.01416	7.50726	0	0	4.47258	7.03895	0	0	4.65891	7.22187	0	0	3.99853	6.5912	0	0	3.16732	5.86426	0	0	YES	YES	YES	YES	YES	30.36	31.01	49.35	1026.51	732.64	51.29	838.59	57.39	508.6	522.06	326.29	287.13	AT1G64160.1	Disease resistance-responsive (dirigent-like protein) family protein		Disease resistance-responsive (dirigent-like protein) family protein; FUNCTIONS IN: molecular_function unknown; INVOLVED IN: lignan biosynthetic process, defense response; LOCATED IN: endomembrane system; EXPRESSED IN: petal, hypocotyl, root; EXPRESSED DURING: petal differentiation and expansion stage; CONTAINS InterPro DOMAIN/s: Plant disease resistance response protein (InterPro:IPR004265); BES…
Potri.007G035300.v4.1		-1.48797	4.74527	5.29042e-66	4.73015e-65	-1.30189	4.77887	1.34387e-59	9.28643e-59	-1.53278	4.76529	1.04114e-74	6.98883e-74	-1.74882	4.69147	2.6695e-87	2.13497e-86	-1.82442	4.69621	3.75611e-101	3.15889e-100	YES	YES	YES	YES	YES	28.48	29.33	47.49	10.06	11.86	50.53	10.96	57.14	9.17	9.1	10.18	7.81	AT2G23470.1	Protein of unknown function, DUF647		ROOT UV-B SENSITIVE 4 (RUS4); CONTAINS InterPro DOMAIN/s: Protein of unknown function DUF647 (InterPro:IPR006968); BEST Arabidopsis thaliana protein match is: Protein of unknown function, DUF647 (TAIR:AT5G49820.1); Has 409 Blast hits to 406 proteins in 122 species: Archae - 0; Bacteria - 0; Metazoa - 106; Fungi - 58; Plants - 179; Viruses - 0; Other Eukaryotes - 66 (source: NCBI BLink).
Potri.009G098601.v4.1		2.37712	6.90407	0	0	1.30651	6.11543	2.80643e-135	4.20059e-134	1.73432	6.44424	4.8727e-289	1.19932e-287	1.99106	6.64025	0	0	2.00016	6.68209	0	0	YES	YES	YES	YES	YES	26.59	24.45	45.33	134.02	68.63	50.34	95.25	56.96	107.69	107.82	110.24	113.27	AT3G19320.1	Leucine-rich repeat (LRR) family protein		Leucine-rich repeat (LRR) family protein; LOCATED IN: endomembrane system; EXPRESSED IN: root; CONTAINS InterPro DOMAIN/s: Leucine-rich repeat (InterPro:IPR001611); BEST Arabidopsis thaliana protein match is: Leucine-rich repeat (LRR) family protein (TAIR:AT1G49750.1); Has 128497 Blast hits to 47794 proteins in 2067 species: Archae - 184; Bacteria - 14728; Metazoa - 28641; Fungi - 6922; Plants - …
Potri.010G080900.v4.1		-2.56857	3.308	1.09696e-61	9.19967e-61	-1.79533	3.40645	8.76312e-43	4.58954e-42	-1.50272	3.53594	6.38778e-33	2.28482e-32	-1.77825	3.44631	2.00062e-41	8.60649e-41	-1.92104	3.43631	3.24742e-48	1.47876e-47	YES	YES	YES	YES	YES	26.5	30.78	43.3	5.41	8.58	48.92	10.89	56.37	8.43	9.25	8.66	8.06	AT4G14640.1	calmodulin 8	encodes a divergent member of calmodulin, which is an EF-hand family of Ca2+-binding proteins. This gene is expressed in leaves, flowers and siliques. The gene functionally complements yeast calmodulin 1 (CAM1). Also the protein does not form formed a complex with a basic amphiphilic helical peptide in the presence of Ca2+ in vitro. Authors suggest that this gene may represent a Ca2+-binding sens…	calmodulin 8 (CAM8); FUNCTIONS IN: calcium ion binding; INVOLVED IN: detection of calcium ion, calcium-mediated signaling; LOCATED IN: cellular_component unknown; EXPRESSED IN: fruit, flower, root, leaf; CONTAINS InterPro DOMAIN/s: EF-Hand 1, calcium-binding site (InterPro:IPR018247), EF-HAND 2 (InterPro:IPR018249), EF-hand-like domain (InterPro:IPR011992), Calcium-binding EF-hand (InterPro:IPR00…
Potri.014G080200.v4.1		-1.89748	4.86843	7.77972e-109	1.15824e-107	-3.88461	4.57929	3.23339e-274	1.04342e-272	-1.47525	4.99657	1.5833e-80	1.13473e-79	-2.91175	4.71	5.8024e-194	1.05613e-192	-1.06516	5.12254	4.008e-51	1.91099e-50	YES	YES	YES	YES	YES	25.99	25.36	42.97	6.25	2.01	48.59	10.13	55.9	3.95	3.26	14.11	12.81	AT2G37360.1	ABC-2 type transporter family protein		ABC-2 type transporter family protein; FUNCTIONS IN: ATPase activity, coupled to transmembrane movement of substances; INVOLVED IN: transport; LOCATED IN: membrane; EXPRESSED IN: petal, hypocotyl, root, flower; EXPRESSED DURING: 4 anthesis, petal differentiation and expansion stage; CONTAINS InterPro DOMAIN/s: ATPase, AAA+ type, core (InterPro:IPR003593), ABC transporter-like (InterPro:IPR003439)…
Potri.019G118500.v4.1		2.23858	5.67621	2.09706e-246	7.79757e-245	1.76922	5.36024	1.05343e-141	1.65478e-140	1.93279	5.49206	3.68452e-177	5.49672e-176	1.56295	5.20472	2.78031e-97	2.47392e-96	1.69349	5.33862	3.02277e-131	3.24444e-130	YES	YES	YES	YES	YES	25.66	27.55	42.88	131.58	96.43	48.46	114.4	55.8	83.97	82.47	94.39	95.33	AT4G03280.1	photosynthetic electron transfer C	Encodes the Rieske FeS center of cytochrome b6f complex. Gene is expressed in shoot but not in root. Mutant has reduced electron transport at saturating light intensities and Q-cycle activity is hypersensitive to acidification of the thylakoid lumen.	photosynthetic electron transfer C (PETC); FUNCTIONS IN: electron transporter, transferring electrons from cytochrome b6/f complex of photosystem II activity; INVOLVED IN: response to karrikin, defense response to bacterium, photosynthetic electron transport in cytochrome b6/f, nonphotochemical quenching; LOCATED IN: in 7 components; EXPRESSED IN: 26 plant structures; EXPRESSED DURING: 14 growth …
Potri.007G005800.v4.1		-2.48747	3.84347	8.51294e-84	9.70424e-83	-1.72667	3.95023	3.99055e-57	2.6554e-56	-1.87355	3.97527	1.86596e-63	1.08621e-62	-2.32734	3.86477	7.58843e-84	5.8677e-83	-3.07668	3.78151	4.39469e-123	4.39956e-122	YES	YES	YES	YES	YES	25.47	24.71	42.86	4.48	8.77	48.16	7.05	53.46	6.07	4.43	2.45	4	AT4G37680.2	heptahelical protein 4	heptahelical transmembrane protein HHP4	heptahelical protein 4 (HHP4); FUNCTIONS IN: receptor activity; INVOLVED IN: response to hormone stimulus, response to sucrose stimulus; LOCATED IN: integral to membrane; EXPRESSED IN: stem, fruit, root, flower, leaf; CONTAINS InterPro DOMAIN/s: Hly-III related (InterPro:IPR004254); BEST Arabidopsis thaliana protein match is: heptahelical protein 5 (TAIR:AT4G38320.1).
Potri.005G070900.v4.1		-3.01236	5.02905	2.03062e-239	7.31119e-238	-1.38083	5.3023	1.08153e-89	1.09048e-88	-2.76316	5.08219	1.1251e-231	2.1946e-230	-2.9812	5.03076	2.87468e-243	6.88784e-242	-1.71687	5.26707	8.64136e-131	9.24551e-130	YES	YES	YES	YES	YES	24.93	27.8	42.09	3.12	10.46	48.13	4.27	51	3.61	3.49	8.99	8.6	AT5G63770.1	diacylglycerol kinase 2	a member of the diacylglycerol kinase gene family. Encodes a functional diacylglycerol kinase. Involved in root elongation and plant development. Gene expression is induced by wounding or cold.	diacylglycerol kinase 2 (DGK2); FUNCTIONS IN: diacylglycerol kinase activity; INVOLVED IN: response to cold, activation of protein kinase C activity by G-protein coupled receptor protein signaling pathway, response to wounding, root development, leaf development; LOCATED IN: endomembrane system; EXPRESSED IN: 24 plant structures; EXPRESSED DURING: 14 growth stages; CONTAINS InterPro DOMAIN/s: Pro…
Potri.006G277000.v4.1	NAC	-1.98509	3.98222	1.72824e-65	1.53374e-64	-2.8227	3.80579	1.52483e-110	1.89033e-109	-2.57618	3.90815	9.82055e-99	8.37107e-98	-3.13023	3.81314	3.83731e-121	4.24719e-120	-2.29348	3.94637	4.52655e-91	3.4602e-90	YES	YES	YES	YES	YES	23.38	23.72	41.44	4.35	2.64	46.7	4.65	49.78	2.72	2.99	5.28	5.26	AT2G24430.2	NAC domain containing protein 38		Arabidopsis NAC domain containing protein 39 (ANAC039); FUNCTIONS IN: sequence-specific DNA binding transcription factor activity; INVOLVED IN: multicellular organismal development, regulation of transcription; LOCATED IN: cellular_component unknown; EXPRESSED IN: stem, hypocotyl, root, leaf; EXPRESSED DURING: LP.04 four leaves visible, LP.02 two leaves visible; CONTAINS InterPro DOMAIN/s: No api…
Potri.006G128000.v4.1		3.1193	6.24833	0	0	4.79479	7.86921	0	0	4.90044	7.98257	0	0	5.43086	8.49159	0	0	4.44667	7.57656	0	0	YES	YES	YES	YES	YES	23.12	23.67	40.88	205.49	715.3	43.5	755.28	46.5	1094.3	1042.98	562.72	562.43	AT2G37170.1	plasma membrane intrinsic protein 2	a member of the plasma membrane intrinsic protein subfamily PIP2. localizes to the plasma membrane and exhibits water transport activity in Xenopus oocyte. expressed specifically in the vascular bundles and protein level increases slightly during leaf dev	plasma membrane intrinsic protein 2 (PIP2B); FUNCTIONS IN: water channel activity; INVOLVED IN: response to water deprivation, response to salt stress, transport, water transport; LOCATED IN: plasma membrane, chloroplast, membrane; EXPRESSED IN: root, cultured cell, callus; EXPRESSED DURING: seedling growth; CONTAINS InterPro DOMAIN/s: Major intrinsic protein, conserved site (InterPro:IPR022357),…
Potri.006G128200.v4.1		2.88069	6.09391	0	0	4.54503	7.68758	0	0	4.72094	7.86667	0	0	5.15874	8.28406	0	0	4.01037	7.22136	0	0	YES	YES	YES	YES	YES	22.57	22.7	40.43	165.57	571.53	40.84	656.9	46.43	869.26	841.5	399.66	402.91	AT2G37170.1	plasma membrane intrinsic protein 2	a member of the plasma membrane intrinsic protein subfamily PIP2. localizes to the plasma membrane and exhibits water transport activity in Xenopus oocyte. expressed specifically in the vascular bundles and protein level increases slightly during leaf dev	plasma membrane intrinsic protein 2 (PIP2B); FUNCTIONS IN: water channel activity; INVOLVED IN: response to water deprivation, response to salt stress, transport, water transport; LOCATED IN: plasma membrane, chloroplast, membrane; EXPRESSED IN: root, cultured cell, callus; EXPRESSED DURING: seedling growth; CONTAINS InterPro DOMAIN/s: Major intrinsic protein, conserved site (InterPro:IPR022357),…
Potri.014G145100.v4.1		3.9912	7.64335	0	0	4.15284	7.84076	0	0	4.94695	8.61391	0	0	4.54191	8.2166	0	0	4.7735	8.47241	0	0	YES	YES	YES	YES	YES	22.55	20.87	39.6	349.53	417.92	40.37	742.25	46.38	536.82	535.88	652.2	650.09	AT5G13930.1	Chalcone and stilbene synthase family protein	Encodes chalcone synthase (CHS), a key enzyme involved in the biosynthesis of flavonoids. Required for the accumulation of purple anthocyanins in leaves and stems. Also involved in the regulation of auxin transport and the modulation of root gravitropism.	TRANSPARENT TESTA 4 (TT4); FUNCTIONS IN: naringenin-chalcone synthase activity; INVOLVED IN: in 11 processes; LOCATED IN: plant-type vacuole membrane, endoplasmic reticulum, nucleus; EXPRESSED IN: 22 plant structures; EXPRESSED DURING: 14 growth stages; CONTAINS InterPro DOMAIN/s: Chalcone/stilbene synthase, N-terminal (InterPro:IPR001099), Thiolase-like (InterPro:IPR016039), Polyketide synthase,…
Potri.001G141400.v4.1		1.36844	5.08863	1.84319e-73	1.83744e-72	1.14853	4.98266	4.45341e-53	2.79333e-52	1.37621	5.15259	2.53042e-79	1.78241e-78	1.21778	5.03598	1.31773e-56	7.21276e-56	1.42749	5.22005	5.82171e-91	4.44158e-90	YES	YES	YES	YES	YES	21.67	22.8	38.09	57.83	52.44	39.8	63.2	46.24	56.03	53.57	67.06	64.6	AT5G46700.1	Tetraspanin family protein	Encodes a transmembrane protein of the tetraspanin (TET) family, one of 17 members found in Arabidopsis. Double mutant analysis showed that TRN1 and TRN2 act in the same pathway. Required for the maintenance of both the radial pattern of tissue differentiation in the root and for the subsequent circumferential pattern within the epidermis.	TORNADO 2 (TRN2); FUNCTIONS IN: molecular_function unknown; INVOLVED IN: radial pattern formation, meristem structural organization, aging, leaf vascular tissue pattern formation, root morphogenesis; LOCATED IN: plasma membrane; EXPRESSED IN: 32 plant structures; EXPRESSED DURING: 14 growth stages; CONTAINS InterPro DOMAIN/s: Tetraspanin (InterPro:IPR018499); BEST Arabidopsis thaliana protein mat…
Potri.013G103000.v4.1		-3.4629	3.35512	1.83167e-93	2.3209e-92	-3.80254	3.26795	4.42139e-113	5.57971e-112	-4.01556	3.33345	5.1313e-114	4.95906e-113	-3.7525	3.31909	1.03272e-107	1.01054e-106	-3.45321	3.35985	2.42627e-104	2.09676e-103	YES	YES	YES	YES	YES	21.04	20.88	38.01	1.62	1.55	39.2	1.13	44.67	1.83	1.4	2.06	2.14	AT1G76690.1	12-oxophytodienoate reductase 2	Encodes one of the closely related 12-oxophytodienoic acid reductases. This enzyme is not expected to participate in jasmonic acid biosynthesis because during in vitro assays, it shows very little activity with the naturally occurring OPDA isomer. Shows activity towards 2,4,6-trinitrotoluene. Expressed predominately in root. Predicted to be a cytosolic protein.	12-oxophytodienoate reductase 2 (OPR2); CONTAINS InterPro DOMAIN/s: Aldolase-type TIM barrel (InterPro:IPR013785), NADH:flavin oxidoreductase/NADH oxidase, N-terminal (InterPro:IPR001155); BEST Arabidopsis thaliana protein match is: 12-oxophytodienoate reductase 1 (TAIR:AT1G76680.1); Has 13197 Blast hits to 13176 proteins in 2056 species: Archae - 127; Bacteria - 9811; Metazoa - 29; Fungi - 865; …
Potri.011G053600.v4.1		1.86698	4.75934	1.17544e-100	1.60101e-99	1.72085	4.70793	1.01805e-89	1.02692e-88	1.17554	4.31327	1.58543e-35	5.98938e-35	1.45597	4.50958	1.10344e-56	6.05108e-56	1.36835	4.47989	3.29089e-53	1.61663e-52	YES	YES	YES	YES	YES	20.59	22.01	37.65	78.28	72.43	38.29	52.08	43.66	64.25	59.07	61.66	59.9	AT2G33790.1	arabinogalactan protein 30	pollen Ole e 1 allergen protein containing 14.6% proline residues, similar to arabinogalactan protein (Daucus carota) GI:11322245, SP:Q03211 Pistil-specific extensin-like protein precursor (PELP) {Nicotiana tabacum}; contains Pfam profile PF01190: Pollen proteins Ole e I family	arabinogalactan protein 30 (AGP30); FUNCTIONS IN: molecular_function unknown; INVOLVED IN: biological_process unknown; LOCATED IN: endomembrane system; EXPRESSED IN: root; CONTAINS InterPro DOMAIN/s: Pollen Ole e 1 allergen/extensin (InterPro:IPR006041); BEST Arabidopsis thaliana protein match is: arabinogalactan protein 31 (TAIR:AT1G28290.1); Has 4773 Blast hits to 1945 proteins in 284 species: …
Potri.001G048800.v4.1		-1.1546	5.71044	4.89249e-81	5.34387e-80	-2.14881	5.45176	1.35577e-212	3.30666e-211	-2.25408	5.4883	1.06209e-224	2.0081e-223	-2.03543	5.50691	4.75855e-183	8.16896e-182	-1.53266	5.64483	2.60743e-146	3.1033e-145	YES	YES	YES	YES	YES	20.52	19.73	37.41	9.7	4.75	38.22	4.57	42.95	5.34	5.11	7.63	7.57	AT1G15520.1	pleiotropic drug resistance 12	ABC transporter family involved in ABA transport and resistance to lead. Localizes to plasma membrane. Upregulated by lead. Expressed in leaves, flowers, stomata and roots.	pleiotropic drug resistance 12 (PDR12); CONTAINS InterPro DOMAIN/s: ATPase, AAA+ type, core (InterPro:IPR003593), ABC transporter-like (InterPro:IPR003439), Plant PDR ABC transporter associated (InterPro:IPR013581), ABC-2 type transporter (InterPro:IPR013525); BEST Arabidopsis thaliana protein match is: pleiotropic drug resistance 11 (TAIR:AT1G66950.1); Has 377983 Blast hits to 279992 proteins in…
Potri.001G376400.v4.1		-1.11735	5.34171	4.9584e-61	4.1294e-60	-1.02355	5.36489	7.52487e-56	4.90577e-55	-1.29653	5.32398	2.86597e-79	2.01695e-78	-1.33782	5.29339	2.74535e-78	2.00562e-77	-1.04724	5.40748	7.17621e-61	3.9156e-60	YES	YES	YES	YES	YES	20.2	20.54	36.42	9.56	9.92	36.73	9.31	41.73	8.18	9.02	11.25	10.35	AT1G06230.3	global transcription factor group E4	This gene is predicted to encode a bromodomain-containing protein. Plant lines expressing RNAi constructs targeted against GTE4 show some resistance to agrobacterium-mediated root transformation.	global transcription factor group E4 (GTE4); FUNCTIONS IN: DNA binding; INVOLVED IN: DNA mediated transformation, cell cycle, root development; LOCATED IN: cellular_component unknown; EXPRESSED IN: 23 plant structures; EXPRESSED DURING: 13 growth stages; CONTAINS InterPro DOMAIN/s: Bromodomain (InterPro:IPR001487); BEST Arabidopsis thaliana protein match is: DNA-binding bromodomain-containing pro…
Potri.016G025000.v4.1		2.06446	5.6551	3.09186e-213	9.70221e-212	1.28167	5.11509	2.029e-69	1.61331e-68	1.68992	5.42302	8.43637e-135	9.48008e-134	1.28604	5.12245	1.55977e-65	9.71882e-65	1.84178	5.57278	2.63239e-175	3.72304e-174	YES	YES	YES	YES	YES	19.9	18.99	35.55	84.14	49.37	36.56	67.28	41.64	50.82	49.7	75.98	76.99	AT3G56940.1	dicarboxylate diiron protein, putative (Crd1)	Encodes a putative ZIP protein with varying mRNA accumulation in leaves, stems and roots. Has a consensus carboxylate-bridged di-iron binding site.	COPPER RESPONSE DEFECT 1 (CRD1); FUNCTIONS IN: magnesium-protoporphyrin IX monomethyl ester (oxidative) cyclase activity, DNA binding; INVOLVED IN: chlorophyll biosynthetic process, oxidation reduction, photosynthesis; LOCATED IN: chloroplast thylakoid membrane, chloroplast, chloroplast inner membrane, chloroplast envelope; EXPRESSED IN: 23 plant structures; EXPRESSED DURING: 14 growth stages; CO…
Potri.014G182800.v4.1		-2.63943	3.50719	3.825e-73	3.80141e-72	-4.61326	3.29176	9.09137e-137	1.37858e-135	-1.53771	3.73648	3.18175e-39	1.295e-38	-2.62806	3.5017	1.20764e-78	8.84437e-78	-1.50404	3.74559	6.72266e-40	2.68199e-39	YES	YES	YES	YES	YES	19.42	18.95	34.77	3.02	0.59	35.45	7.87	41.37	3.59	2.92	7.52	7.39	AT2G16230.1	O-Glycosyl hydrolases family 17 protein		O-Glycosyl hydrolases family 17 protein; FUNCTIONS IN: cation binding, hydrolase activity, hydrolyzing O-glycosyl compounds, catalytic activity; INVOLVED IN: carbohydrate metabolic process; LOCATED IN: endomembrane system; EXPRESSED IN: root; CONTAINS InterPro DOMAIN/s: X8 (InterPro:IPR012946), Glycoside hydrolase, catalytic core (InterPro:IPR017853), Glycoside hydrolase, family 17 (InterPro:IPR0…
Potri.005G235500.v4.1		-5.1775	3.48827	1.17583e-144	2.35986e-143	-6.36701	3.39496	7.13836e-179	1.43448e-177	-5.1223	3.50246	4.38434e-154	5.67612e-153	-4.24598	3.50389	1.08064e-136	1.37209e-135	-3.19558	3.59824	1.99776e-113	1.85978e-112	YES	YES	YES	YES	YES	17.27	17.97	34.33	0.48	0.14	34.82	0.53	40.37	0.88	1.09	1.74	2.44	AT1G19900.1	glyoxal oxidase-related protein		glyoxal oxidase-related protein; FUNCTIONS IN: molecular_function unknown; INVOLVED IN: biological_process unknown; LOCATED IN: endomembrane system; EXPRESSED IN: root; CONTAINS InterPro DOMAIN/s: Galactose oxidase/kelch, beta-propeller (InterPro:IPR011043), Galactose oxidase, beta-propeller (InterPro:IPR015916), Immunoglobulin E-set (InterPro:IPR014756), Glyoxal oxidase, N-terminal (InterPro:IPR…
Potri.006G123900.v4.1		1.58905	7.0163	4.55315e-290	2.08135e-288	1.53748	7.01677	8.31621e-285	2.81294e-283	2.1493	7.50927	0	0	1.51982	7.01157	2.42459e-255	6.0687e-254	1.74204	7.21284	0	0	YES	YES	YES	YES	YES	17.11	16.26	33.88	51.23	52.96	33.81	81.25	39.28	51.16	50.74	61.41	60.59	AT2G36910.1	ATP binding cassette subfamily B1	Belongs to the family of ATP-binding cassette (ABC) transporters. Also known as AtMDR1.Possibly regulates auxin-dependent responses by influencing basipetal auxin transport in the root. Exerts nonredundant, partially overlapping functions with the ABC transporter encoded by AT3G28860. PGP1 mediates cellular efflux of IAA and interacts with PIN genes that may confer an accelerated vectoral compone…	ATP binding cassette subfamily B1 (ABCB1); FUNCTIONS IN: ATPase activity, coupled to transmembrane movement of substances, calmodulin binding, auxin efflux transmembrane transporter activity; INVOLVED IN: in 10 processes; LOCATED IN: plasma membrane; EXPRESSED IN: 26 plant structures; EXPRESSED DURING: 13 growth stages; CONTAINS InterPro DOMAIN/s: ATPase, AAA+ type, core (InterPro:IPR003593), ABC…
Potri.004G069400.v4.1		-1.11746	3.98724	1.26159e-24	4.96227e-24	-1.22598	3.93776	2.33313e-31	9.70011e-31	-1.08995	4.02928	5.15522e-26	1.58879e-25	-1.05786	4.02037	3.49213e-24	1.06102e-23	-1.31912	3.96349	1.07432e-36	4.03017e-36	YES	YES	YES	YES	YES	16.86	16.87	32.69	8.55	7.38	33.75	8.67	38.34	7.75	9.53	7.31	7.5	AT1G48380.1	root hair initiation protein root hairless 1 (RHL1)	Encodes a novel nuclear protein required for root hair initiation and ploidy-dependent cell growth. Its sequence has similarity to the C-terminal domain of mammalian DNA topo IIalpha. Shows in vitro DNA binding activity and is likely to be part of the topo VI complex by binding to subunit A.	ROOT HAIRLESS 1 (RHL1); FUNCTIONS IN: protein binding, DNA binding; INVOLVED IN: root hair initiation, DNA endoreduplication; LOCATED IN: nucleolus; EXPRESSED IN: 19 plant structures; EXPRESSED DURING: 10 growth stages; Has 191 Blast hits to 179 proteins in 66 species: Archae - 0; Bacteria - 2; Metazoa - 46; Fungi - 37; Plants - 69; Viruses - 0; Other Eukaryotes - 37 (source: NCBI BLink).
Potri.011G022400.v4.1		1.62992	4.70131	7.81052e-77	8.09153e-76	1.37605	4.57089	2.20882e-56	1.45393e-55	1.88959	4.96216	4.35125e-121	4.47691e-120	1.90264	4.97109	3.33181e-118	3.59973e-117	1.33224	4.57597	8.94678e-54	4.43396e-53	YES	YES	YES	YES	YES	16.5	18	32.55	55.83	47.5	33.71	66.95	37.75	67.04	69.79	48.93	46.86	AT4G05530.1	indole-3-butyric acid response 1	Encodes a peroxisomal member of the short-chain dehydrogenase/reductase (SDR) family of enzymes. Loss of IBR1 function causes increased resistance to indole-3-butyric acid without affecting plant responses to IAA, NAA, and 2,4-D. This enzyme may be responsible for catalyzing a dehydrogenation step in the beta-oxidation-like conversion of IBA to IAA.	indole-3-butyric acid response 1 (IBR1); FUNCTIONS IN: oxidoreductase activity, binding, catalytic activity; INVOLVED IN: root hair elongation, indolebutyric acid metabolic process, response to indolebutyric acid stimulus; LOCATED IN: peroxisome; EXPRESSED IN: 24 plant structures; EXPRESSED DURING: 16 growth stages; CONTAINS InterPro DOMAIN/s: Short-chain dehydrogenase/reductase, conserved site (…
Potri.002G045900.v4.1		1.07682	5.26284	2.17106e-53	1.60509e-52	1.1134	5.33187	1.70588e-63	1.25159e-62	1.25087	5.43855	5.69925e-84	4.21625e-83	1.19854	5.39677	1.31728e-70	8.77678e-70	1.19663	5.42933	1.07127e-78	7.16601e-78	YES	YES	YES	YES	YES	15.95	17.25	32.36	36.5	37.46	33.62	43.82	32.84	41.56	39.45	39.74	43.66	AT3G54610.1	histone acetyltransferase of the GNAT family 1	Encodes a histone acetyltransferase that is plays a role in the determination of the embryonic root-shoot axis. It is also required to regulate the floral meristem activity by modulating the extent of expression of WUS and AG. In other eukaryotes, this protein is recruited to specific promoters by DNA binding transcription factors and is thought to promote transcription by acetylating the N-termi…	histone acetyltransferase of the GNAT family 1 (HAG1); FUNCTIONS IN: histone acetyltransferase activity, DNA binding, H3 histone acetyltransferase activity; INVOLVED IN: flower development, histone acetylation, response to light stimulus, positive regulation of transcription, root morphogenesis; LOCATED IN: histone acetyltransferase complex, nucleus; EXPRESSED IN: 9 plant structures; EXPRESSED DU…
Potri.009G031800.v4.1		2.49746	5.5332	1.40248e-266	5.78275e-265	2.2402	5.38279	1.32009e-210	3.17616e-209	1.93505	5.13606	3.98486e-141	4.66601e-140	1.43543	4.75388	5.60415e-64	3.41159e-63	1.59637	4.90875	1.51751e-90	1.15215e-89	YES	YES	YES	YES	YES	15.86	16.95	30.55	95.16	82.67	33.25	66.76	31.34	46.52	47.65	52.8	56.29	AT2G39700.1	expansin A4	putative expansin. Naming convention from the Expansin Working Group (Kende et al, 2004. Plant Mol Bio). Involved in the formation of nematode-induced syncytia in roots of Arabidopsis thaliana.	expansin A4 (EXPA4); CONTAINS InterPro DOMAIN/s: Barwin-related endoglucanase (InterPro:IPR009009), Pollen allergen, N-terminal (InterPro:IPR014734), Expansin (InterPro:IPR002963), Rare lipoprotein A (InterPro:IPR005132), Expansin/Lol pI (InterPro:IPR007118), Expansin 45, endoglucanase-like (InterPro:IPR007112), Pollen allergen/expansin, C-terminal (InterPro:IPR007117); BEST Arabidopsis thaliana …
Potri.005G087000.v4.1		1.13295	3.19569	7.46645e-16	2.20614e-15	-2.98014	1.71086	8.25671e-30	3.3104e-29	-2.13253	1.9074	2.56292e-20	6.80393e-20	-3.66326	1.69529	1.05028e-35	4.08204e-35	-4.94064	1.64852	8.98673e-45	3.89099e-44	YES	YES	YES	YES	YES	15.3	12.58	30.4	30.11	1.95	30.54	4.59	30.18	1.01	1.28	0.58	0.4	AT5G64770.1		Encodes a root meristem growth factor (RGF). Belongs to a family of functionally redundant homologous peptides that are secreted, tyrosine-sulfated, and expressed mainly in the stem cell area and the innermost layer of central columella cells. RGFs are required for maintenance of the root stem cell niche and transit amplifying cell proliferation. Members of this family include: At5g60810 (RGF1), …	root meristem growth factor 9 (RGF9); FUNCTIONS IN: molecular_function unknown; LOCATED IN: endomembrane system; EXPRESSED IN: 15 plant structures; EXPRESSED DURING: 9 growth stages; Has 1807 Blast hits to 1807 proteins in 277 species: Archae - 0; Bacteria - 0; Metazoa - 736; Fungi - 347; Plants - 385; Viruses - 0; Other Eukaryotes - 339 (source: NCBI BLink).
Potri.001G457000.v4.1		-1.17296	4.12142	3.53029e-29	1.58226e-28	-2.44463	3.80556	6.6154e-91	6.77326e-90	-2.41014	3.87728	1.53811e-87	1.18469e-86	-1.76741	3.97534	1.21042e-57	6.73493e-57	-2.69504	3.8284	3.14599e-106	2.76758e-105	YES	YES	YES	YES	YES	14.79	14.44	29.43	6.55	3.12	30.32	2.79	29.22	4.2	4.96	2.3	2.62	AT1G76490.1	hydroxy methylglutaryl CoA reductase 1	Encodes a 3-hydroxy-3-methylglutaryl coenzyme A reductase, which is involved in melavonate biosynthesis and performs the first committed step in isoprenoid biosynthesis. Expression is activated in dark in leaf tissue but not controlled by light in the root (confine	hydroxy methylglutaryl CoA reductase 1 (HMG1); CONTAINS InterPro DOMAIN/s: Hydroxymethylglutaryl-CoA reductase, class I, catalytic (InterPro:IPR004554), Hydroxymethylglutaryl-CoA reductase, class I/II, substrate-binding (InterPro:IPR009029), Hydroxymethylglutaryl-CoA reductase, class I/II, NAD/NADP-binding (InterPro:IPR009023), Hydroxymethylglutaryl-CoA reductase, class I/II, catalytic (InterPro:…
Potri.003G112700.v4.1		1.30336	5.19093	5.24406e-72	5.11769e-71	1.46077	5.3543	5.34467e-100	5.9969e-99	1.44404	5.3497	7.43019e-98	6.29455e-97	1.62484	5.47997	4.55871e-122	5.08628e-121	1.17042	5.18407	2.7022e-62	1.49771e-61	YES	YES	YES	YES	YES	14.23	14.43	29.08	35.87	44.47	30.06	43.3	29.21	47.17	46.79	35.92	34.83	AT4G12420.2	Cupredoxin superfamily protein	Encodes a protein of unknown function involved in directed root tip growth. It is a member of 19-member gene family and is distantly related structurally to the multiple-copper oxidases ascorbate oxidase and laccase, though it lacks the copper-binding domains. The protein is glycosylated and GPI-anchored. It is localized to the plasma membrane and the cell wall. The gene is expressed most strongl…	SKU5; FUNCTIONS IN: oxidoreductase activity, copper ion binding; INVOLVED IN: cell tip growth; LOCATED IN: plasma membrane, anchored to membrane, plant-type cell wall; EXPRESSED IN: 23 plant structures; EXPRESSED DURING: 13 growth stages; CONTAINS InterPro DOMAIN/s: Multicopper oxidase, type 3 (InterPro:IPR011707), Cupredoxin (InterPro:IPR008972), Multicopper oxidase, type 2 (InterPro:IPR011706),…
Potri.014G184100.v4.1		-2.22326	3.05836	2.84436e-43	1.75362e-42	-4.40398	2.78901	1.1343e-94	1.21282e-93	-1.2181	3.31181	5.77231e-20	1.51812e-19	-2.50469	3.00803	4.7045e-53	2.44927e-52	-1.82081	3.15576	5.67611e-37	2.14093e-36	YES	YES	YES	YES	YES	14.19	12.93	29.06	2.26	0.86	29.08	5.88	28.96	2.55	2.46	3.52	4.85	AT2G16230.1	O-Glycosyl hydrolases family 17 protein		O-Glycosyl hydrolases family 17 protein; FUNCTIONS IN: cation binding, hydrolase activity, hydrolyzing O-glycosyl compounds, catalytic activity; INVOLVED IN: carbohydrate metabolic process; LOCATED IN: endomembrane system; EXPRESSED IN: root; CONTAINS InterPro DOMAIN/s: X8 (InterPro:IPR012946), Glycoside hydrolase, catalytic core (InterPro:IPR017853), Glycoside hydrolase, family 17 (InterPro:IPR0…
Potri.004G007400.v4.1		-1.28022	3.3686	1.48058e-21	5.30604e-21	-1.30927	3.33827	2.66954e-24	9.31244e-24	-1.23842	3.41132	6.3968e-22	1.77426e-21	-1.01668	3.46053	3.95418e-16	9.59737e-16	-1.09971	3.4577	4.38298e-19	1.11296e-18	YES	YES	YES	YES	YES	14.09	14.33	29.05	5.34	5.98	28.33	6.68	28.93	7.12	7.81	7.02	7.51	AT1G11915.1			unknown protein; FUNCTIONS IN: molecular_function unknown; INVOLVED IN: biological_process unknown; LOCATED IN: endomembrane system; EXPRESSED IN: root; BEST Arabidopsis thaliana protein match is: unknown protein (TAIR:AT3G17350.1); Has 261 Blast hits to 261 proteins in 13 species: Archae - 0; Bacteria - 0; Metazoa - 0; Fungi - 0; Plants - 261; Viruses - 0; Other Eukaryotes - 0 (source: NCBI BLin…
Potri.006G001400.v4.1		1.30546	6.50069	2.65717e-158	5.8724e-157	1.11899	6.40938	1.15319e-118	1.52508e-117	1.28598	6.54115	1.09838e-172	1.59589e-171	1.3509	6.58059	3.20822e-169	5.05439e-168	1.30216	6.5789	2.73168e-190	4.1804e-189	YES	YES	YES	YES	YES	14.08	14.31	28.85	37.65	33.14	27.35	38.5	27.92	38.13	39.07	39.16	37.45	AT3G13300.1	Transducin/WD40 repeat-like superfamily protein	Encodes VCS (VARICOSE). Involved in mRNA decapping. VCS forms a mRNA decapping complex with DCP1 (At1g08370) and DCP2 (At5g13570). Unlike DCP2, VCS itself does not have mRNA decapping activity in vitro. DCP1, DCP2 and VCS colocalize in cytoplasmic loci, which are putative Arabidopsis mRNA processing bodies. Null mutants of DCP1, DCP2, and VCS accumulate capped mRNAs with a reduced degradation rat…	VARICOSE (VCS); FUNCTIONS IN: protein homodimerization activity, nucleotide binding; INVOLVED IN: mRNA catabolic process, deadenylation-independent decapping of nuclear-transcribed mRNA, leaf morphogenesis; LOCATED IN: cytosol, nucleus, cytoplasmic mRNA processing body; EXPRESSED IN: whole plant, guard cell, cultured cell; CONTAINS InterPro DOMAIN/s: WD40 repeat-like-containing domain (InterPro:I…
Potri.014G183500.v4.1		-2.18711	2.91429	6.68732e-38	3.69029e-37	-3.04295	2.74318	1.22412e-58	8.33713e-58	-2.52682	2.88245	9.185e-49	4.37958e-48	-3.09575	2.78306	8.59857e-61	4.99438e-60	-1.94644	2.97792	1.9586e-36	7.31007e-36	YES	YES	YES	YES	YES	13.59	19.72	26.07	3.73	2.08	26.96	2.75	27.59	2.49	1.58	5.04	4.56	AT2G16230.1	O-Glycosyl hydrolases family 17 protein		O-Glycosyl hydrolases family 17 protein; FUNCTIONS IN: cation binding, hydrolase activity, hydrolyzing O-glycosyl compounds, catalytic activity; INVOLVED IN: carbohydrate metabolic process; LOCATED IN: endomembrane system; EXPRESSED IN: root; CONTAINS InterPro DOMAIN/s: X8 (InterPro:IPR012946), Glycoside hydrolase, catalytic core (InterPro:IPR017853), Glycoside hydrolase, family 17 (InterPro:IPR0…
Potri.008G135200.v4.1		-1.90751	3.74666	1.0218e-52	7.47883e-52	-2.32396	3.62958	4.91387e-74	4.15527e-73	-1.81657	3.79163	2.23132e-53	1.13664e-52	-1.77166	3.77836	2.18314e-51	1.10746e-50	-1.09401	3.9876	9.37422e-27	2.88228e-26	YES	YES	YES	YES	YES	13.24	11.64	26	2.93	2.94	26.46	3.66	27.14	4.47	3.2	6.58	6.18	AT1G68050.1	flavin-binding, kelch repeat, f box 1	Encodes FKF1, a flavin-binding kelch repeat F box protein, is clock-controlled, regulates transition to flowering. Forms a complex with GI on the CO promoter to regulate CO expression.	flavin-binding, kelch repeat, f box 1 (FKF1); FUNCTIONS IN: ubiquitin-protein ligase activity, signal transducer activity; INVOLVED IN: response to blue light, positive regulation of flower development, circadian rhythm, ubiquitin-dependent protein catabolic process, regulation of transcription; LOCATED IN: cellular_component unknown; EXPRESSED IN: whole plant, root tip, male gametophyte, leaf, p…
Potri.009G099032.v4.1		-1.73971	3.83361	2.43883e-47	1.6263e-46	-1.60231	3.83745	5.60129e-47	3.15771e-46	-1.47025	3.92689	4.19954e-41	1.7651e-40	-1.0689	4.02386	8.03442e-25	2.47949e-24	-1.7644	3.85403	2.17277e-56	1.11904e-55	YES	YES	YES	YES	YES	13.18	13.53	25.97	4.85	4.74	25.87	5.79	26.88	6.21	7.38	4.13	4.47	AT2G15490.3	UDP-glycosyltransferase 73B4		UDP-glycosyltransferase 73B4 (UGT73B4); FUNCTIONS IN: quercetin 3-O-glucosyltransferase activity, UDP-glycosyltransferase activity, quercetin 7-O-glucosyltransferase activity, UDP-glucosyltransferase activity, transferase activity, transferring glycosyl groups; INVOLVED IN: response to other organism; LOCATED IN: endomembrane system; EXPRESSED IN: root; CONTAINS InterPro DOMAIN/s: UDP-glucuronosy…
Potri.006G135600.v4.1	bHLH	1.70286	5.05198	6.54718e-105	9.33744e-104	1.98586	5.33175	2.85561e-167	5.36614e-166	2.12493	5.44505	1.97398e-199	3.33369e-198	2.06608	5.39618	1.34199e-173	2.17385e-172	2.1262	5.48065	2.30741e-208	3.96476e-207	YES	YES	YES	YES	YES	12.73	10.8	25.05	39.05	49.62	25.6	56.29	26.73	53.65	50.77	56.46	55.99	AT5G58010.1	LJRHL1-like 3	Encodes a basic helix-loop-helix (bHLH) protein that regulates root hair development. One of the three Arabidopsis homologs of the Lotus japonicus ROOTHAIRLESS1 (LjRHL1) gene: At2g24260 (AtLRL1), At4g30980 (AtLRL2), and At5g58010 (AtLRL3).	LJRHL1-like 3 (LRL3); CONTAINS InterPro DOMAIN/s: Helix-loop-helix DNA-binding domain (InterPro:IPR001092), Helix-loop-helix DNA-binding (InterPro:IPR011598); BEST Arabidopsis thaliana protein match is: LJRHL1-like 1 (TAIR:AT2G24260.1); Has 3430 Blast hits to 3424 proteins in 205 species: Archae - 0; Bacteria - 0; Metazoa - 226; Fungi - 49; Plants - 3153; Viruses - 0; Other Eukaryotes - 2 (source…
Potri.002G092700.v4.1		1.65507	7.18698	0	0	1.83707	7.36568	0	0	2.36809	7.81103	0	0	2.03274	7.52858	0	0	1.6805	7.28613	0	0	YES	YES	YES	YES	YES	12.63	13.55	23.53	43.04	51.89	24.54	74.93	26.64	57.25	57.01	45.52	46.25	AT1G36160.2	acetyl-CoA carboxylase 1	Encodes acetyl-CoA carboxylase. Mutant displays uncoordinated cell divisions which are enhanced by cytokinins. Mutant also has aberrant organization of the apical region in the embryo and abnormal root and shoot development. Essential for very long chain fatty acid elongation.	acetyl-CoA carboxylase 1 (ACC1); CONTAINS InterPro DOMAIN/s: Acetyl-coenzyme A carboxyltransferase, N-terminal (InterPro:IPR011762), Carboxyl transferase (InterPro:IPR000022), Biotin/lipoyl attachment (InterPro:IPR000089), Carbamoyl phosphate synthase, large subunit, N-terminal (InterPro:IPR005481), PreATP-grasp-like fold (InterPro:IPR016185), ATP-grasp fold (InterPro:IPR011761), Biotin carboxyla…
Potri.016G143833.v4.1		-1.72046	4.20656	3.73826e-59	3.02132e-58	-2.66457	3.9982	1.68831e-114	2.15646e-113	-1.97328	4.18038	1.21243e-78	8.48662e-78	-1.93568	4.1646	5.42632e-75	3.81625e-74	-1.96532	4.17937	3.64277e-83	2.55755e-82	YES	YES	YES	YES	YES	12.22	10.58	23.51	3.76	1.94	24.19	2.77	26.54	2.69	3.69	2.98	3.38	AT3G54220.1	GRAS family transcription factor	Encodes a member of a novel family having similarity to DNA binding proteins containing basic-leucine zipper regions; scr is expressed in cortex/endodermal initial cells and in the endodermal cell lineage. Regulates the radial organization of the root. Is required cell-autonomously for distal specification of the quiescent center, which in turn regulates stem cell fate of immediately surrounding …	SCARECROW (SCR); CONTAINS InterPro DOMAIN/s: Transcription factor GRAS (InterPro:IPR005202); BEST Arabidopsis thaliana protein match is: GRAS family transcription factor (TAIR:AT5G41920.1); Has 4362 Blast hits to 4213 proteins in 491 species: Archae - 0; Bacteria - 22; Metazoa - 838; Fungi - 368; Plants - 2661; Viruses - 19; Other Eukaryotes - 454 (source: NCBI BLink).
Potri.015G046800.v4.1	NAC	-1.6339	2.80824	1.16901e-22	4.32763e-22	-4.66845	2.41173	1.2354e-76	1.07569e-75	-1.35206	2.9073	1.23982e-18	3.14042e-18	-2.58279	2.6306	2.38874e-43	1.06095e-42	-1.26425	2.93436	1.80038e-17	4.37958e-17	YES	YES	YES	YES	YES	12.15	11.97	23.47	4.01	0.32	24.17	5.44	26.48	1.54	2.77	4.89	6.09	AT3G18400.1	NAC domain containing protein 58		NAC domain containing protein 58 (NAC058); FUNCTIONS IN: sequence-specific DNA binding transcription factor activity; INVOLVED IN: multicellular organismal development, regulation of transcription; LOCATED IN: cellular_component unknown; EXPRESSED IN: hypocotyl, root, flower; EXPRESSED DURING: petal differentiation and expansion stage; CONTAINS InterPro DOMAIN/s: No apical meristem (NAM) protein …
Potri.011G146900.v4.1		2.13335	5.32033	1.19024e-182	3.10816e-181	2.84295	5.98427	0	0	3.20423	6.30519	0	0	3.6558	6.71566	0	0	3.91848	6.9963	0	0	YES	YES	YES	YES	YES	12.06	10.44	21.61	53.27	87.68	23.06	116.86	26.27	154.14	146.53	182.84	189.53	AT4G10380.1	NOD26-like intrinsic protein 5;1	Boric acid channel. Essential for efficient boron uptake and plant development under boron limitation. Also functions in arsenite transport and tolerance. Localized preferentially in outer membrane domains of root cells.	NOD26-like intrinsic protein 5;1 (NIP5;1); CONTAINS InterPro DOMAIN/s: Major intrinsic protein, conserved site (InterPro:IPR022357), Major intrinsic protein (InterPro:IPR000425); BEST Arabidopsis thaliana protein match is: NOD26-like intrinsic protein 6;1 (TAIR:AT1G80760.1); Has 10572 Blast hits to 10477 proteins in 2169 species: Archae - 110; Bacteria - 5205; Metazoa - 1362; Fungi - 448; Plants …
Potri.001G051600.v4.1		3.59415	6.24394	0	0	4.72062	7.36645	0	0	5.29214	7.92779	0	0	5.08006	7.71618	0	0	4.96588	7.64123	0	0	YES	YES	YES	YES	YES	11.82	11.96	21.13	150.06	345.19	23	508.29	26.21	433.43	418.8	404.93	410.43	AT5G13930.1	Chalcone and stilbene synthase family protein	Encodes chalcone synthase (CHS), a key enzyme involved in the biosynthesis of flavonoids. Required for the accumulation of purple anthocyanins in leaves and stems. Also involved in the regulation of auxin transport and the modulation of root gravitropism.	TRANSPARENT TESTA 4 (TT4); FUNCTIONS IN: naringenin-chalcone synthase activity; INVOLVED IN: in 11 processes; LOCATED IN: plant-type vacuole membrane, endoplasmic reticulum, nucleus; EXPRESSED IN: 22 plant structures; EXPRESSED DURING: 14 growth stages; CONTAINS InterPro DOMAIN/s: Chalcone/stilbene synthase, N-terminal (InterPro:IPR001099), Thiolase-like (InterPro:IPR016039), Polyketide synthase,…
Potri.008G048700.v4.1		1.53027	4.81563	1.63577e-74	1.64876e-73	2.28034	5.46487	3.46836e-226	9.03957e-225	2.14392	5.35279	6.47755e-191	1.04927e-189	2.90991	6.00232	0	0	2.87561	6.00901	0	0	YES	YES	YES	YES	YES	11.76	10.89	20.93	33.14	59.54	22.64	54.75	25.55	92.88	87.67	92.09	90.12	AT2G39380.1	exocyst subunit exo70 family protein H2	A member of EXO70 gene family, putative exocyst subunits, conserved in land plants. Arabidopsis thaliana contains 23 putative EXO70 genes, which can be classified into eight clusters on the phylogenetic tree.	exocyst subunit exo70 family protein H2 (EXO70H2); INVOLVED IN: exocytosis, vesicle docking involved in exocytosis; LOCATED IN: exocyst; EXPRESSED IN: leaf apex, hypocotyl, root, stamen; EXPRESSED DURING: 4 anthesis; CONTAINS InterPro DOMAIN/s: Exo70 exocyst complex subunit (InterPro:IPR004140); BEST Arabidopsis thaliana protein match is: exocyst subunit exo70 family protein H1 (TAIR:AT3G55150.1)…
Potri.002G024700.v4.1	ARF	1.7759	6.1271	2.00894e-235	7.09814e-234	2.08994	6.42591	0	0	1.83595	6.23171	2.05599e-285	5.00777e-284	1.78299	6.18617	8.01963e-235	1.82147e-233	2.2077	6.56056	0	0	YES	YES	YES	YES	YES	11.58	10.86	20.72	40.45	52.27	21.44	44.15	24.59	41.52	40.68	54.05	59.2	AT1G19850.1	Transcriptional factor B3 family protein / auxin-responsive factor AUX/IAA-related	Encodes a transcription factor (IAA24) mediating embryo axis formation and vascular development. Similar to AUXIN RESPONSIVE FACTOR 1 (ARF1) shown to bind to auxin responsive elements (AREs), and to the maize transcriptional activator VIVIPAROUS 1( VP1). In situ hybridization shows expression in provascular tissue of embryos, the emerging shoot primordia, then is restricted to provascular tissue,…	MONOPTEROS (MP); FUNCTIONS IN: sequence-specific DNA binding transcription factor activity, promoter binding; INVOLVED IN: in 8 processes; LOCATED IN: nucleus, membrane; EXPRESSED IN: 21 plant structures; EXPRESSED DURING: 11 growth stages; CONTAINS InterPro DOMAIN/s: Aux/IAA-ARF-dimerisation (InterPro:IPR011525), Transcriptional factor B3 (InterPro:IPR003340), AUX/IAA protein (InterPro:IPR003311…
Potri.017G114200.v4.1		-3.65171	2.87942	1.30703e-71	1.26575e-70	-2.61102	2.92898	1.78938e-57	1.19722e-56	-3.5473	2.90174	2.16424e-76	1.47864e-75	-2.91367	2.93266	3.8914e-62	2.2994e-61	-2.94103	2.94798	2.7313e-65	1.56704e-64	YES	YES	YES	YES	YES	11.03	11.17	20.36	1.13	1.7	21.15	1.08	23.93	1.74	1.35	1.31	1.83	AT5G38450.1	cytochrome P450, family 735, subfamily A, polypeptide 1	member of CYP709A	cytochrome P450, family 735, subfamily A, polypeptide 1 (CYP735A1); FUNCTIONS IN: electron carrier activity, monooxygenase activity, iron ion binding, oxygen binding, heme binding; INVOLVED IN: oxidation reduction; LOCATED IN: endomembrane system; EXPRESSED IN: male gametophyte, root, pollen tube; EXPRESSED DURING: M germinated pollen stage; CONTAINS InterPro DOMAIN/s: Cytochrome P450 (InterPro:I…
Potri.001G018300.v4.1		1.76685	4.58751	1.00286e-81	1.10763e-80	1.67064	4.57482	6.0169e-79	5.35786e-78	2.1726	4.97123	1.37424e-152	1.75391e-151	2.11774	4.92664	1.55287e-136	1.96956e-135	2.80803	5.54641	0	0	YES	YES	YES	YES	YES	10.96	11.31	19.92	37.77	37.92	21.02	53.48	23.75	52.1	50.44	86.88	84.61	AT3G20830.1	AGC (cAMP-dependent, cGMP-dependent and protein kinase C) kinase family protein		AGC (cAMP-dependent, cGMP-dependent and protein kinase C) kinase family protein; FUNCTIONS IN: kinase activity; INVOLVED IN: protein amino acid phosphorylation; LOCATED IN: chloroplast; EXPRESSED IN: hypocotyl, male gametophyte, root, pedicel, carpel; EXPRESSED DURING: 4 anthesis; CONTAINS InterPro DOMAIN/s: Protein kinase, ATP binding site (InterPro:IPR017441), Protein kinase, catalytic domain (…
Potri.012G086500.v4.1		1.24755	3.27275	1.34674e-19	4.54361e-19	2.18824	4.05086	1.17106e-85	1.13529e-84	2.70331	4.47723	2.42483e-154	3.14623e-153	2.96493	4.70887	1.45872e-194	2.66335e-193	1.703	3.69888	2.23527e-46	9.90243e-46	YES	YES	YES	YES	YES	10.87	9.14	19.57	23.96	49.21	20.57	72.39	23.45	86.73	77.61	34.73	36.91	AT1G56280.1	drought-induced 19	Encodes a gene whose transcript level in root and leaves increases to progressive drought stress. The increase in transcript level is independent from abscisic acid level. Sequence is not similar to any protein of known function. It appears to be a member of plant-specific gene family. It's phosphorylated by AtCPK11 in a Ca(2+)-dependent manner at Thr105 and Ser107 within the AtDi19 bipartite nuc…	drought-induced 19 (DI19); CONTAINS InterPro DOMAIN/s: Drought induced 19/ RING finger protein 114 (InterPro:IPR008598); BEST Arabidopsis thaliana protein match is: Drought-responsive family protein (TAIR:AT3G05700.1); Has 243 Blast hits to 243 proteins in 23 species: Archae - 0; Bacteria - 0; Metazoa - 5; Fungi - 0; Plants - 238; Viruses - 0; Other Eukaryotes - 0 (source: NCBI BLink).
Potri.006G020900.v4.1		2.36059	5.13623	6.90525e-190	1.89241e-188	1.65579	4.63865	9.04931e-81	8.25482e-80	2.28238	5.13737	4.22315e-183	6.50765e-182	2.57789	5.38535	6.02306e-243	1.4373e-241	2.90572	5.70751	0	0	YES	YES	YES	YES	YES	9.97	9.6	19.03	55.25	32.42	20.01	54.11	23.22	61.72	62.4	79.87	81.05	AT3G22200.1	Pyridoxal phosphate (PLP)-dependent transferases superfamily protein	Genetically redundant with POP3;mediates pollen tube guidance. Double mutants are self sterile; gamma-aminobutyrate transaminase subunit precursor; nuclear gene for mitochondrial product. Encodes gamma-aminobutyrate transaminase that uses pyruvate instead of alpha-ketoglutarate as cosubstrate. Mutations in POP2/HER1 render roots resistant to the inhibitory growth effects of the volatile organic c…	POLLEN-PISTIL INCOMPATIBILITY 2 (POP2); FUNCTIONS IN: 4-aminobutyrate:pyruvate transaminase activity, cobalt ion binding, 4-aminobutyrate transaminase activity, zinc ion binding; INVOLVED IN: in 11 processes; LOCATED IN: mitochondrion, plasma membrane; EXPRESSED IN: 28 plant structures; EXPRESSED DURING: 16 growth stages; CONTAINS InterPro DOMAIN/s: Pyridoxal phosphate-dependent transferase, majo…
Potri.009G129500.v4.1		1.85059	3.97939	8.15483e-60	6.66917e-59	2.05618	4.21133	7.09117e-87	6.96492e-86	2.5126	4.58359	2.25668e-148	2.80819e-147	2.24915	4.36503	5.96568e-106	5.73041e-105	1.68068	3.94994	6.9308e-54	3.44357e-53	YES	YES	YES	YES	YES	9.72	8.6	19	36.19	40.71	19.83	57.68	22.9	46.51	45.54	31.5	32.99	AT2G21170.1	triosephosphate isomerase	Encodes a plastidic triose phosphate isomerase. Mutants with reduced pdTPI levels have difficulty transitioning from heterotrophic to autotrophic growth. The related phenotypes, such as chlorosis in light-grown seedlings may result from an accumulation of dihydroxyacetone phosphate (DHAP) and methylglyoxal (MG) in these mutants. Both splice variants appear to be expressed, but the At2g21170.2 var…	triosephosphate isomerase (TIM); FUNCTIONS IN: triose-phosphate isomerase activity; INVOLVED IN: in 7 processes; LOCATED IN: in 6 components; EXPRESSED IN: 24 plant structures; EXPRESSED DURING: 15 growth stages; CONTAINS InterPro DOMAIN/s: Triosephosphate isomerase, active site (InterPro:IPR020861), Aldolase-type TIM barrel (InterPro:IPR013785), Triosephosphate isomerase (InterPro:IPR000652); BE…
Potri.005G169100.v4.1		1.30696	6.55145	2.31996e-162	5.27071e-161	1.55194	6.77022	2.63992e-259	7.99569e-258	2.0645	7.18178	0	0	1.6326	6.83781	4.55745e-272	1.2324e-270	1.20308	6.55823	2.88583e-161	3.77697e-160	YES	YES	YES	YES	YES	8.89	8.91	18.24	22.43	28.88	19.45	41.35	22.86	28.71	30.19	21.31	23.43	AT1G36160.2	acetyl-CoA carboxylase 1	Encodes acetyl-CoA carboxylase. Mutant displays uncoordinated cell divisions which are enhanced by cytokinins. Mutant also has aberrant organization of the apical region in the embryo and abnormal root and shoot development. Essential for very long chain fatty acid elongation.	acetyl-CoA carboxylase 1 (ACC1); CONTAINS InterPro DOMAIN/s: Acetyl-coenzyme A carboxyltransferase, N-terminal (InterPro:IPR011762), Carboxyl transferase (InterPro:IPR000022), Biotin/lipoyl attachment (InterPro:IPR000089), Carbamoyl phosphate synthase, large subunit, N-terminal (InterPro:IPR005481), PreATP-grasp-like fold (InterPro:IPR016185), ATP-grasp fold (InterPro:IPR011761), Biotin carboxyla…
Potri.003G205800.v4.1		2.59357	4.91669	1.15838e-188	3.14423e-187	3.20179	5.52461	0	0	3.83842	6.10351	0	0	3.82587	6.0915	0	0	3.52667	5.85318	0	0	YES	YES	YES	YES	YES	8.6	10.05	17.5	60.12	92.66	19.41	152.29	22.75	141.25	139.98	119.42	117.49	AT3G20830.1	AGC (cAMP-dependent, cGMP-dependent and protein kinase C) kinase family protein		AGC (cAMP-dependent, cGMP-dependent and protein kinase C) kinase family protein; FUNCTIONS IN: kinase activity; INVOLVED IN: protein amino acid phosphorylation; LOCATED IN: chloroplast; EXPRESSED IN: hypocotyl, male gametophyte, root, pedicel, carpel; EXPRESSED DURING: 4 anthesis; CONTAINS InterPro DOMAIN/s: Protein kinase, ATP binding site (InterPro:IPR017441), Protein kinase, catalytic domain (…
Potri.011G117100.v4.1		-2.09723	2.32065	2.75423e-24	1.07349e-23	-2.7601	2.16771	9.71638e-37	4.55173e-36	-3.29408	2.18474	1.72333e-43	7.51311e-43	-4.02324	2.09997	1.99779e-52	1.03031e-51	-2.90833	2.2125	3.42681e-38	1.32637e-37	YES	YES	YES	YES	YES	8.47	6.58	17.13	2.34	1.07	19.07	1.08	22.06	0.57	0.4	1.24	0.92	AT3G23560.1	MATE efflux family protein	Member of the multidrug and toxic compound extrusion (MATE) family, protects roots from inhibitory compounds.	ABERRANT LATERAL ROOT FORMATION 5 (ALF5); FUNCTIONS IN: antiporter activity, drug transmembrane transporter activity, transporter activity; INVOLVED IN: response to toxin; LOCATED IN: membrane; EXPRESSED IN: 18 plant structures; EXPRESSED DURING: 6 growth stages; CONTAINS InterPro DOMAIN/s: Multi antimicrobial extrusion protein MatE (InterPro:IPR002528); BEST Arabidopsis thaliana protein match is…
Potri.013G154700.v4.1		2.82424	4.4229	2.5289e-151	5.27586e-150	1.81741	3.66296	1.07979e-49	6.43322e-49	1.61973	3.51065	1.05065e-36	4.06555e-36	2.80981	4.48186	6.40423e-158	9.36887e-157	1.21541	3.25075	1.25704e-19	3.24097e-19	YES	YES	YES	YES	YES	8.2	7.5	16.76	52.11	30.17	18.31	26.7	21.7	59.63	56.67	20.41	19.73	AT2G40610.1	expansin A8	member of Alpha-Expansin Gene Family. Naming convention from the Expansin Working Group (Kende et al, 2004. Plant Mol Bio). Involved in the formation of nematode-induced syncytia in roots of Arabidopsis thaliana.	expansin A8 (EXPA8); INVOLVED IN: plant-type cell wall modification involved in multidimensional cell growth, syncytium formation, unidimensional cell growth, plant-type cell wall loosening; LOCATED IN: endomembrane system, extracellular region; EXPRESSED IN: 21 plant structures; EXPRESSED DURING: 10 growth stages; CONTAINS InterPro DOMAIN/s: Pollen allergen, N-terminal (InterPro:IPR014734), Rare…
Potri.001G110700.v4.1	ERF	-6.34353	1.50105	6.8112e-42	4.0851e-41	1.23085	3.18232	3.34782e-19	1.0083e-18	-9.59622	1.49422	4.19745e-48	1.97964e-47	-3.0378	1.62052	3.94863e-28	1.30933e-27	-1.82649	1.83215	1.50092e-15	3.44167e-15	YES	YES	YES	YES	YES	8.1	6.68	16.74	0	18.78	18.22	0	21.63	0.96	0.92	2.1	2.45	AT5G51990.1	C-repeat-binding factor 4	encodes a member of the DREB subfamily A-1 of ERF/AP2 transcription factor family (CBF4). The protein contains one AP2 domain. There are six members in this subfamily, including CBF1, CBF2, and CBF3. This gene is involved in response to drought stress and abscisic acid treatment, but not to low temperature.	C-repeat-binding factor 4 (CBF4); FUNCTIONS IN: DNA binding, transcription activator activity, sequence-specific DNA binding transcription factor activity; INVOLVED IN: response to water deprivation, regulation of transcription, DNA-dependent, response to abscisic acid stimulus; LOCATED IN: nucleus, chloroplast; EXPRESSED IN: stem, root, pedicel, carpel; EXPRESSED DURING: 4 anthesis, petal differ…
Potri.010G202700.v4.1		1.68009	5.19256	6.3102e-113	9.78576e-112	1.40327	5.04143	5.49366e-78	4.83433e-77	1.82778	5.36696	1.70605e-148	2.12639e-147	1.78751	5.33298	4.99774e-132	6.06761e-131	2.02031	5.55245	1.3693e-201	2.2433e-200	YES	YES	YES	YES	YES	8.06	7.68	16.09	26.54	21.75	18.07	31.67	21.02	28.92	28.88	34.75	35.1	AT3G48670.2	XH/XS domain-containing protein	Encodes IDN2 (INVOLVED IN DE NOVO 2), a double-stranded RNA-binding protein involved in de novo methylation and small interfering RNA (siRNA)-mediated maintenance methylation. IND2 is a component of the RNA-directed DNA methylation pathway.	INVOLVED IN DE NOVO 2 (IDN2); FUNCTIONS IN: molecular_function unknown; INVOLVED IN: response to cadmium ion, chromatin silencing, DNA methylation; LOCATED IN: cellular_component unknown; EXPRESSED IN: root; CONTAINS InterPro DOMAIN/s: Domain of unknown function XS (InterPro:IPR005380), Domain of unknown function XH (InterPro:IPR005379), Domain of unknown function, putative Zinc finger, XS/XH (In…
Potri.016G056100.v4.1		3.99664	5.95982	0	0	2.94072	5.0685	7.85371e-253	2.30634e-251	3.0179	5.12907	1.42439e-271	3.27833e-270	2.67876	4.83461	1.05843e-183	1.82631e-182	2.68567	4.87879	2.16416e-201	3.5376e-200	YES	YES	YES	YES	YES	7.76	7.64	15.34	124.89	65.78	18.07	66.52	20.98	53.34	51.21	52.08	56.68	AT2G41810.1	Protein of unknown function, DUF642		FUNCTIONS IN: molecular_function unknown; INVOLVED IN: biological_process unknown; LOCATED IN: endomembrane system; EXPRESSED IN: root; CONTAINS InterPro DOMAIN/s: Protein of unknown function DUF642 (InterPro:IPR006946), Galactose-binding domain-like (InterPro:IPR008979); BEST Arabidopsis thaliana protein match is: Protein of unknown function, DUF642 (TAIR:AT2G41800.1); Has 306 Blast hits to 298 …
Potri.009G005400.v4.1		1.75982	3.78762	6.13473e-49	4.2222e-48	2.15805	4.17123	6.79349e-90	6.8646e-89	2.61162	4.54446	1.08457e-153	1.39871e-152	2.15798	4.1671	1.54225e-88	1.24827e-87	1.99375	4.07129	2.2941e-77	1.51263e-76	YES	YES	YES	YES	YES	7.71	8.69	14.3	28.89	41.98	18.06	54.25	20.98	38.34	39.41	36.93	35.17	AT2G36830.1	gamma tonoplast intrinsic protein	Encodes a tonoplast intrinsic protein, which functions as water channel. It has also been shown to be able to facilitate the transport of urea and hydrogen peroxide. Highly expressed in vascular tissues of the root, stem, cauline leaves and flowers but not in the apical meristems.	gamma tonoplast intrinsic protein (GAMMA-TIP); FUNCTIONS IN: water channel activity, urea transmembrane transporter activity; INVOLVED IN: in 6 processes; LOCATED IN: in 7 components; EXPRESSED IN: 33 plant structures; EXPRESSED DURING: 13 growth stages; CONTAINS InterPro DOMAIN/s: Major intrinsic protein, conserved site (InterPro:IPR022357), Aquaporin (InterPro:IPR012269), Major intrinsic protei…
Potri.011G161100.v4.1		-1.89041	2.47206	3.46061e-23	1.30557e-22	-2.49112	2.31933	1.42227e-35	6.48828e-35	-5.41946	2.19346	5.11613e-67	3.1259e-66	-4.83377	2.17583	5.05052e-63	3.023e-62	-6.65168	2.15578	1.00771e-73	6.3778e-73	YES	YES	YES	YES	YES	7.67	6.88	14.17	1.53	1.81	17.91	0.17	20.26	0.2	0.37	0	0.15	AT1G30760.1	FAD-binding Berberine family protein		FAD-binding Berberine family protein; FUNCTIONS IN: electron carrier activity, oxidoreductase activity, FAD binding, catalytic activity; LOCATED IN: endomembrane system; EXPRESSED IN: inflorescence meristem, root, flower, pedicel; EXPRESSED DURING: 4 anthesis, petal differentiation and expansion stage; CONTAINS InterPro DOMAIN/s: FAD-binding, type 2 (InterPro:IPR016166), Berberine/berberine-like …
Potri.004G169300.v4.1		1.50928	4.05728	1.34747e-44	8.53447e-44	1.25862	3.93259	7.12337e-31	2.92795e-30	1.63462	4.2117	2.09564e-59	1.16128e-58	1.58416	4.17147	1.18842e-53	6.2438e-53	1.49114	4.13754	7.58531e-50	3.54685e-49	YES	YES	YES	YES	YES	7.58	7.74	13.11	21.75	21.72	17.7	26.07	19.41	22.81	26.1	25	22.36	AT4G34880.1	Amidase family protein		Amidase family protein; FUNCTIONS IN: amidase activity, carbon-nitrogen ligase activity, with glutamine as amido-N-donor; INVOLVED IN: acrylonitrile catabolic process, aldoxime metabolic process; LOCATED IN: endomembrane system; EXPRESSED IN: root; CONTAINS InterPro DOMAIN/s: Amidase (InterPro:IPR000120); BEST Arabidopsis thaliana protein match is: Amidase family protein (TAIR:AT5G07360.2); Has 1…
Potri.009G025400.v4.1		-1.33271	3.02791	1.93315e-18	6.27866e-18	-1.47854	2.96241	7.09246e-24	2.44542e-23	-2.29666	2.84713	1.06458e-41	4.51996e-41	-1.76793	2.92485	2.3334e-29	7.94314e-29	-1.50744	3.01069	1.62358e-24	4.73144e-24	YES	YES	YES	YES	YES	7.15	6.8	13.08	2.91	2.9	17.55	1.39	19.13	2.04	2.32	3.05	2.35	AT3G45880.1	2-oxoglutarate (2OG) and Fe(II)-dependent oxygenase superfamily protein		2-oxoglutarate (2OG) and Fe(II)-dependent oxygenase superfamily protein; INVOLVED IN: phospholipid biosynthetic process; LOCATED IN: cellular_component unknown; EXPRESSED IN: shoot apex, root, seed; EXPRESSED DURING: E expanded cotyledon stage; CONTAINS InterPro DOMAIN/s: Transcription factor jumonji/aspartyl beta-hydroxylase (InterPro:IPR003347); BEST Arabidopsis thaliana protein match is: 2-oxo…
Potri.001G288301.v4.1		3.99	3.7244	1.02699e-145	2.06662e-144	5.34004	5.10712	0	0	4.32624	4.11675	4.03574e-209	7.17817e-208	6.11964	5.85844	0	0	4.76979	4.58607	0	5.00271e-307	YES	YES	YES	YES	YES	7.05	5.12	13.05	99.05	257.73	17.46	129.85	18.69	464.38	414.35	188.72	181.07	AT2G14580.1	basic pathogenesis-related protein 1	pathogenesis related protein, encodes a basic PR1-like protein. Expresses in flowers, roots, and not in leaves and responses to ethylene and methyl jasmonate. Salicylic acid represses gene expression.	basic pathogenesis-related protein 1 (PRB1); FUNCTIONS IN: molecular_function unknown; INVOLVED IN: response to ethylene stimulus, response to jasmonic acid stimulus, response to salicylic acid stimulus; LOCATED IN: endomembrane system, extracellular region; EXPRESSED IN: shoot, shoot apex, root, flower, leaf; CONTAINS InterPro DOMAIN/s: Allergen V5/Tpx-1 related, conserved site (InterPro:IPR0182…
Potri.014G133500.v4.1		2.31019	4.88703	5.942e-155	1.28202e-153	1.41983	4.25564	1.99833e-48	1.15782e-47	1.59329	4.38683	2.78499e-63	1.61557e-62	1.41525	4.25363	2.91696e-46	1.3637e-45	1.58624	4.41582	1.15292e-65	6.66352e-65	YES	YES	YES	YES	YES	7	6.36	12.99	35	18.96	17.41	21.35	18.49	18.58	19.27	20.71	23.13	AT1G03010.1	Phototropic-responsive NPH3 family protein		Phototropic-responsive NPH3 family protein; FUNCTIONS IN: signal transducer activity; INVOLVED IN: response to light stimulus, pollen tube growth; EXPRESSED IN: leaf apex, inflorescence meristem, cauline leaf, root, flower; EXPRESSED DURING: M germinated pollen stage, petal differentiation and expansion stage; CONTAINS InterPro DOMAIN/s: NPH3 (InterPro:IPR004249), BTB/POZ fold (InterPro:IPR011333…
Potri.006G096800.v4.1		-1.32625	2.92908	2.05508e-17	6.42397e-17	-1.23525	2.93268	2.7721e-17	7.81475e-17	-1.1994	2.99569	3.2144e-16	7.57012e-16	-1.73779	2.8312	4.0018e-27	1.29809e-26	-1.5336	2.90323	1.11792e-23	3.19603e-23	YES	YES	YES	YES	YES	6.97	6.15	12.88	2.66	2.86	17.17	3.77	18.35	2.29	1.87	2.42	2.53	AT3G54140.1	peptide transporter 1	Encodes a di- and tri-peptide transporter that recognizes a variety of different amino acid combinations. GFP-tagged PTR1 localizes to the plasma membrane and has 8 to 11 predicted transmembrane domains. PTR1 is expressed in a number of different vascular tissues throughout the plant based on promoter:GUS expression analysis. ptr1 mutants have a lower dry weight than wild type plants when both ar…	peptide transporter 1 (PTR1); FUNCTIONS IN: dipeptide transporter activity, tripeptide transporter activity, transporter activity; INVOLVED IN: dipeptide transport, oligopeptide transport, nitrogen compound metabolic process, tripeptide transport; LOCATED IN: plasma membrane, membrane; EXPRESSED IN: 40 plant structures; EXPRESSED DURING: 10 growth stages; CONTAINS InterPro DOMAIN/s: PTR2 family p…
Potri.019G028800.v4.1		-2.22863	1.29677	3.39965e-14	9.37566e-14	-9.20136	0.963838	9.86341e-37	4.61967e-36	-9.13645	1.05519	5.78233e-36	2.20399e-35	-6.85239	1.02906	9.34292e-35	3.55442e-34	-4.34551	1.10077	3.69943e-28	1.17783e-27	YES	YES	YES	YES	YES	6.86	5.67	12.72	1.2	0	17.08	0	17.93	0	0.1	0.48	0.21	AT4G13440.1	Calcium-binding EF-hand family protein		Calcium-binding EF-hand family protein; FUNCTIONS IN: calcium ion binding; INVOLVED IN: biological_process unknown; LOCATED IN: cellular_component unknown; EXPRESSED IN: root; CONTAINS InterPro DOMAIN/s: EF-Hand 1, calcium-binding site (InterPro:IPR018247), EF-HAND 2 (InterPro:IPR018249), EF-hand-like domain (InterPro:IPR011992), Calcium-binding EF-hand (InterPro:IPR002048); Has 160 Blast hits to…
Potri.011G160900.v4.1		-2.3707	2.27538	1.64472e-28	7.24718e-28	-2.5819	2.19233	1.38544e-34	6.20784e-34	-7.8402	2.05494	7.38082e-70	4.68446e-69	-4.37641	2.08127	9.25168e-55	4.94452e-54	-5.19228	2.06838	1.53868e-61	8.46241e-61	YES	YES	YES	YES	YES	6.81	7.15	12.55	1.7	0.77	16.91	0	17.7	0.27	0.42	0.17	0.22	AT1G30760.1	FAD-binding Berberine family protein		FAD-binding Berberine family protein; FUNCTIONS IN: electron carrier activity, oxidoreductase activity, FAD binding, catalytic activity; LOCATED IN: endomembrane system; EXPRESSED IN: inflorescence meristem, root, flower, pedicel; EXPRESSED DURING: 4 anthesis, petal differentiation and expansion stage; CONTAINS InterPro DOMAIN/s: FAD-binding, type 2 (InterPro:IPR016166), Berberine/berberine-like …
Potri.010G038200.v4.1		1.28149	1.97549	1.23604e-09	2.76167e-09	4.07919	4.4056	1.17087e-238	3.25288e-237	3.78344	4.11211	1.9052e-183	2.93969e-182	3.84445	4.17486	6.47794e-190	1.15675e-188	1.11995	1.95893	1.22291e-07	2.07656e-07	YES	YES	YES	YES	YES	6.46	7.96	12.43	19.56	132.44	16.75	104.64	17.64	109.13	109.12	15.86	19.08	AT1G10460.1	germin-like protein 7	germin-like protein (GLP7)	germin-like protein 7 (GLP7); FUNCTIONS IN: manganese ion binding, nutrient reservoir activity; INVOLVED IN: biological_process unknown; LOCATED IN: apoplast; EXPRESSED IN: inflorescence meristem, hypocotyl, root, flower; EXPRESSED DURING: petal differentiation and expansion stage; CONTAINS InterPro DOMAIN/s: Cupin, RmlC-type (InterPro:IPR011051), Cupin 1 (InterPro:IPR006045), Germin (InterPro:IP…
Potri.004G171300.v4.1		3.22654	5.44649	0	0	2.20192	4.63407	4.92825e-128	7.00537e-127	2.40665	4.799	3.93843e-160	5.2981e-159	1.88726	4.3777	4.40692e-81	3.313e-80	1.52559	4.13697	6.80112e-52	3.27261e-51	YES	YES	YES	YES	YES	6.43	7.01	12.28	67.64	32.84	16.33	37.25	17.41	26.2	26.73	20.92	21.58	AT4G34880.1	Amidase family protein		Amidase family protein; FUNCTIONS IN: amidase activity, carbon-nitrogen ligase activity, with glutamine as amido-N-donor; INVOLVED IN: acrylonitrile catabolic process, aldoxime metabolic process; LOCATED IN: endomembrane system; EXPRESSED IN: root; CONTAINS InterPro DOMAIN/s: Amidase (InterPro:IPR000120); BEST Arabidopsis thaliana protein match is: Amidase family protein (TAIR:AT5G07360.2); Has 1…
Potri.019G101900.v4.1		2.3284	3.91973	6.38135e-83	7.16294e-82	2.73147	4.33901	1.03683e-137	1.5836e-136	2.86503	4.44607	9.97472e-164	1.37421e-162	2.42862	4.07449	9.18508e-100	8.37214e-99	2.8013	4.43098	3.52695e-160	4.5905e-159	YES	YES	YES	YES	YES	6.23	5.64	12.25	31.34	46.31	16.23	48.77	17.4	34.56	33.11	46.56	44.46	AT4G28250.1	expansin B3	putative beta-expansin/allergen protein. Naming convention from the Expansin Working Group (Kende et al, 2004. Plant Mol Bio). Involved in the formation of nematode-induced syncytia in roots of Arabidopsis thaliana.	expansin B3 (EXPB3); INVOLVED IN: response to cyclopentenone, syncytium formation, plant-type cell wall organization, unidimensional cell growth, plant-type cell wall loosening; LOCATED IN: endomembrane system, extracellular region; EXPRESSED IN: 21 plant structures; EXPRESSED DURING: 13 growth stages; CONTAINS InterPro DOMAIN/s: Pollen allergen, N-terminal (InterPro:IPR014734), Rare lipoprotein …
Potri.015G131400.v4.1		1.37559	4.54268	1.07485e-51	7.73991e-51	1.38064	4.60065	1.64599e-57	1.10288e-56	1.68392	4.83083	6.2164e-92	5.00197e-91	1.57964	4.74966	2.19866e-75	1.55091e-74	1.37294	4.63197	8.14155e-59	4.33663e-58	YES	YES	YES	YES	YES	6.14	7.03	12.25	18.16	19.04	16.2	24.18	16.99	21.18	20.76	19.1	18.34	AT5G51600.1	Microtubule associated protein (MAP65/ASE1) family protein	Mutant has defective roots. Essential for giant cell ontogenesis. Role in organizing the mitotic microtubule array during both early and late mitosis in all plant organs.	PLEIADE (PLE); CONTAINS InterPro DOMAIN/s: Microtubule-associated protein, MAP65/ASE1-type (InterPro:IPR007145); BEST Arabidopsis thaliana protein match is: microtubule-associated protein 65-4 (TAIR:AT3G60840.1); Has 4514 Blast hits to 3795 proteins in 427 species: Archae - 120; Bacteria - 292; Metazoa - 2464; Fungi - 290; Plants - 515; Viruses - 1; Other Eukaryotes - 832 (source: NCBI BLink).
Potri.011G117300.v4.1		-2.40982	2.09988	2.61523e-26	1.07832e-25	-2.52391	2.03064	6.74395e-30	2.70998e-29	-2.80742	2.06487	1.35839e-32	4.8212e-32	-3.77165	1.94514	1.37723e-44	6.24648e-44	-2.73493	2.06353	1.70971e-32	5.92751e-32	YES	YES	YES	YES	YES	6.01	5.04	12.24	0.69	0.72	15.94	0.69	16.79	0.58	0.24	0.73	1.09	AT3G23560.1	MATE efflux family protein	Member of the multidrug and toxic compound extrusion (MATE) family, protects roots from inhibitory compounds.	ABERRANT LATERAL ROOT FORMATION 5 (ALF5); FUNCTIONS IN: antiporter activity, drug transmembrane transporter activity, transporter activity; INVOLVED IN: response to toxin; LOCATED IN: membrane; EXPRESSED IN: 18 plant structures; EXPRESSED DURING: 6 growth stages; CONTAINS InterPro DOMAIN/s: Multi antimicrobial extrusion protein MatE (InterPro:IPR002528); BEST Arabidopsis thaliana protein match is…
Potri.008G081800.v4.1	G2-like	-1.12149	1.92735	2.11931e-07	4.18901e-07	-1.42185	1.81601	7.27594e-11	1.59387e-10	-1.31339	1.90224	1.53388e-09	2.86792e-09	-1.61582	1.80037	8.84293e-13	1.9073e-12	-1.07778	1.9751	1.7744e-07	2.98946e-07	YES	YES	YES	YES	YES	5.71	4.4	11.62	2.29	2.24	15.81	2.1	16.72	1.49	2.02	2.51	2.72	AT1G79430.2	Homeodomain-like superfamily protein	Encodes gene product that is required for several aspects of phloem development in the root: (1) the specific divisions organizing the phloem pole, (2) sieve element differentiation and (3) the expression of a companion-specific gene. Mutant has a defect in the organization of phloem poles in the root. apl seedlings have a short, determinate root with only occasional lateral branches.	ALTERED PHLOEM DEVELOPMENT (APL); CONTAINS InterPro DOMAIN/s: Myb, DNA-binding (InterPro:IPR014778), Homeodomain-like (InterPro:IPR009057), Myb-like DNA-binding domain, SHAQKYF class (InterPro:IPR006447), Homeodomain-related (InterPro:IPR012287), HTH transcriptional regulator, Myb-type, DNA-binding (InterPro:IPR017930); BEST Arabidopsis thaliana protein match is: Homeodomain-like superfamily prot…
Potri.003G074400.v4.1	bHLH	1.04806	2.84239	2.08929e-11	5.07827e-11	1.6084	3.29522	1.45186e-32	6.22033e-32	1.56958	3.26671	4.82462e-30	1.61906e-29	1.52624	3.23326	1.70916e-27	5.58798e-27	1.31598	3.11359	1.76792e-20	4.65988e-20	YES	YES	YES	YES	YES	5.46	5.28	11.6	11.46	17.69	15.51	18.31	16.35	16.58	16.21	16.54	12.98	AT3G47640.3	basic helix-loop-helix (bHLH) DNA-binding superfamily protein	Encodes POPEYE (PYE), a bHLH transcription factor regulating response to iron deficiency in Arabidopsis roots.	POPEYE (PYE); FUNCTIONS IN: DNA binding, sequence-specific DNA binding transcription factor activity; INVOLVED IN: cellular response to iron ion starvation, iron ion homeostasis, regulation of transcription; LOCATED IN: nucleus, chloroplast; EXPRESSED IN: 23 plant structures; EXPRESSED DURING: 13 growth stages; CONTAINS InterPro DOMAIN/s: Helix-loop-helix DNA-binding domain (InterPro:IPR001092), …
Potri.003G162400.v4.1		1.77653	4.29919	3.65907e-68	3.39031e-67	1.75224	4.34414	2.43005e-73	2.03559e-72	2.13633	4.64736	8.5302e-121	8.75729e-120	2.34458	4.8187	5.41008e-150	7.51318e-149	1.76364	4.38784	1.41716e-77	9.36775e-77	YES	YES	YES	YES	YES	5.28	5.78	11.6	19.56	20.29	15.24	27.24	16.3	29.79	30.05	20.54	20.68	AT1G57820.1	Zinc finger (C3HC4-type RING finger) family protein	Encodes a 645-amino acid methylcytosine-binding protein with a PHD domain, two RING finger domains, and an SRA domain that is involved in centromere heterochromatinization. This protein functions as an E3 ubiquitin ligase in vitro. The protein has been shown to bind to methylated cytosines of CG, CNG and CNN motifs via its SRA domain but has a preference for the former. It plays a role in the est…	VARIANT IN METHYLATION 1 (VIM1); CONTAINS InterPro DOMAIN/s: Zinc finger, RING-type, conserved site (InterPro:IPR017907), Zinc finger, PHD-type, conserved site (InterPro:IPR019786), Zinc finger, RING-type (InterPro:IPR001841), Zinc finger, PHD-type (InterPro:IPR001965), SRA-YDG (InterPro:IPR003105), Zinc finger, C3HC4 RING-type (InterPro:IPR018957), Zinc finger, FYVE/PHD-type (InterPro:IPR011011)…
Potri.002G149400.v4.1		1.25646	4.30722	1.56063e-37	8.54152e-37	1.07569	4.23284	2.34802e-29	9.32209e-29	1.3344	4.42148	1.40541e-47	6.57796e-47	1.32973	4.41456	1.21016e-45	5.5932e-45	1.25683	4.39647	1.35819e-43	5.76588e-43	YES	YES	YES	YES	YES	5.14	5.31	11.55	12.96	12.31	15.22	14.74	16.16	13.83	14.16	14.48	12.92	AT1G01950.1	armadillo repeat kinesin 2	Encodes a member of the armadillo/beta-catenin repeat kinesin motor family. Mutants have twisted roots due to abnormal cell file rotation; the phenotype is dependent on microtubules.	armadillo repeat kinesin 2 (ARK2); FUNCTIONS IN: microtubule motor activity, binding, ATP binding; INVOLVED IN: root development; LOCATED IN: chloroplast; EXPRESSED IN: 23 plant structures; EXPRESSED DURING: 13 growth stages; CONTAINS InterPro DOMAIN/s: Kinesin, motor region, conserved site (InterPro:IPR019821), Armadillo-like helical (InterPro:IPR011989), Armadillo (InterPro:IPR000225), Armadill…
Potri.013G102900.v4.1		-4.05046	1.46519	3.06811e-31	1.44916e-30	-3.88564	1.40298	4.78167e-33	2.07125e-32	-5.09478	1.4358	4.42344e-38	1.7561e-37	-2.99905	1.52791	3.18836e-26	1.01412e-25	-3.83627	1.47353	3.96618e-32	1.36499e-31	YES	YES	YES	YES	YES	5.13	5.31	11.31	0.14	0.3	14.92	0.19	15.9	0.98	0.31	0.19	0.59	AT1G76690.1	12-oxophytodienoate reductase 2	Encodes one of the closely related 12-oxophytodienoic acid reductases. This enzyme is not expected to participate in jasmonic acid biosynthesis because during in vitro assays, it shows very little activity with the naturally occurring OPDA isomer. Shows activity towards 2,4,6-trinitrotoluene. Expressed predominately in root. Predicted to be a cytosolic protein.	12-oxophytodienoate reductase 2 (OPR2); CONTAINS InterPro DOMAIN/s: Aldolase-type TIM barrel (InterPro:IPR013785), NADH:flavin oxidoreductase/NADH oxidase, N-terminal (InterPro:IPR001155); BEST Arabidopsis thaliana protein match is: 12-oxophytodienoate reductase 1 (TAIR:AT1G76680.1); Has 13197 Blast hits to 13176 proteins in 2056 species: Archae - 127; Bacteria - 9811; Metazoa - 29; Fungi - 865; …
Potri.001G011300.v4.1		5.45291	6.09357	0	0	6.93853	7.61756	0	0	7.70664	8.38942	0	0	7.42832	8.10637	0	0	6.13561	6.86703	0	0	YES	YES	YES	YES	YES	5.04	4.62	11.17	213.01	641.16	13.8	1108.96	14.83	905.9	863.74	376.19	376.87	AT3G49120.1	peroxidase CB	Class III peroxidase Perx34. Expressed in roots, leaves and stems. Located in the cell wall. Involved in cell elongation. Expression activated by light. May play a role in generating H2O2 during defense response.	peroxidase CB (PRXCB); FUNCTIONS IN: peroxidase activity; INVOLVED IN: oxygen and reactive oxygen species metabolic process, response to light stimulus, defense response to bacterium, defense response to fungus, unidimensional cell growth; LOCATED IN: apoplast, cell wall, plasma membrane, vacuole, plant-type cell wall; EXPRESSED IN: stem, root, guard cell, cultured cell, leaf; EXPRESSED DURING: s…
Potri.018G057700.v4.1		1.47063	2.56272	6.5864e-17	2.0243e-16	1.85691	2.91836	2.33376e-32	9.94542e-32	2.31909	3.28347	1.50127e-56	8.02291e-56	2.49796	3.43483	9.6543e-69	6.27796e-68	1.95628	3.0282	3.00649e-37	1.13948e-36	YES	YES	YES	YES	YES	4.98	5.15	11.01	14.98	19.91	13.8	28.42	14.57	29.76	30.89	22.98	20.51	AT4G32830.1	ataurora1	Encodes a member of a family of Ser/Thr kinases whose activities peak during cell division. Transcripts are abundant in tissues rich in dividing cells like roots and flowers but are low or absent in fully expanded leaves and stems. In interphase cells, the protein is predominantly nuclear. During mitosis, the protein associates with plant-specific cytoskeletal structures (preprophase band, phragm…	ataurora1 (AUR1); CONTAINS InterPro DOMAIN/s: Spindle assembly checkpoint kinase (InterPro:IPR020663), Protein kinase, ATP binding site (InterPro:IPR017441), Protein kinase, catalytic domain (InterPro:IPR000719), Serine/threonine-protein kinase domain (InterPro:IPR002290), Calcium/calmodulin-dependent protein kinase-like (InterPro:IPR020636), Serine/threonine-protein kinase-like domain (InterPro:…
Potri.019G026700.v4.1		-1.84906	1.187	4.80634e-10	1.09524e-09	-2.80514	0.982726	6.54736e-18	1.88943e-17	-1.6126	1.26234	5.29745e-09	9.67445e-09	-1.37117	1.29982	2.06281e-07	3.53477e-07	-1.20124	1.36988	3.64492e-06	5.75518e-06	YES	YES	YES	YES	YES	4.73	3.92	10.55	1.63	0.25	13.6	1.5	14.48	1.86	1.69	2.92	1.25	AT3G05950.1	RmlC-like cupins superfamily protein		RmlC-like cupins superfamily protein; FUNCTIONS IN: manganese ion binding, nutrient reservoir activity; INVOLVED IN: biological_process unknown; LOCATED IN: endomembrane system, apoplast; EXPRESSED IN: sperm cell, male gametophyte, root, flower, pollen tube; EXPRESSED DURING: L mature pollen stage, M germinated pollen stage, 4 anthesis; CONTAINS InterPro DOMAIN/s: Cupin, RmlC-type (InterPro:IPR01…
Potri.002G153500.v4.1	ERF	-3.73047	1.03842	7.32741e-22	2.64745e-21	-2.80853	1.05713	8.49784e-19	2.52332e-18	-3.40614	1.07431	2.08644e-21	5.71998e-21	-4.98053	0.95992	1.40528e-28	4.70686e-28	-5.00759	0.975079	1.03281e-28	3.33114e-28	YES	YES	YES	YES	YES	4.7	5.19	10.55	0.44	0.38	13.52	0.57	14.09	0.07	0.25	0.17	0.15	AT5G19790.1	related to AP2 11	encodes a member of the ERF (ethylene response factor) subfamily B-6 of ERF/AP2 transcription factor family (RAP2.11). The protein contains one AP2 domain. There are 12 members in this subfamily including RAP2.11.	related to AP2 11 (RAP2.11); FUNCTIONS IN: DNA binding, sequence-specific DNA binding transcription factor activity; INVOLVED IN: regulation of transcription, DNA-dependent; LOCATED IN: nucleus; EXPRESSED IN: root hair, epidermis, primary root differentiation zone; CONTAINS InterPro DOMAIN/s: DNA-binding, integrase-type (InterPro:IPR016177), Pathogenesis-related transcriptional factor/ERF, DNA-bi…
Potri.017G130100.v4.1		-4.27882	1.19516	2.04125e-27	8.73847e-27	-6.16796	1.06655	1.76468e-37	8.39236e-37	-2.74145	1.32776	1.64728e-19	4.28183e-19	-4.22144	1.1751	4.71643e-30	1.63146e-29	-2.95277	1.29097	1.75115e-21	4.74989e-21	YES	YES	YES	YES	YES	4.59	4.65	10.49	0.22	0	13.51	0.93	13.98	0.36	0.14	0.61	0.68	AT5G37690.1	SGNH hydrolase-type esterase superfamily protein		SGNH hydrolase-type esterase superfamily protein; FUNCTIONS IN: lipase activity, hydrolase activity, acting on ester bonds; INVOLVED IN: lipid metabolic process; LOCATED IN: endomembrane system; EXPRESSED IN: shoot, hypocotyl, root; CONTAINS InterPro DOMAIN/s: Lipase, GDSL (InterPro:IPR001087), Esterase, SGNH hydrolase-type (InterPro:IPR013830); BEST Arabidopsis thaliana protein match is: GDSL-li…
Potri.006G246000.v4.1		1.21315	3.06076	1.10524e-16	3.36323e-16	1.02667	2.9874	1.14222e-12	2.71243e-12	1.62195	3.41567	5.89457e-35	2.2009e-34	1.77701	3.53289	3.56607e-43	1.57849e-42	1.92615	3.68622	1.12881e-56	5.82266e-56	YES	YES	YES	YES	YES	4.53	4.98	10.45	12.64	11	13.34	16.2	13.84	17.52	17.13	18.73	20.97	AT2G25680.1	molybdate transporter 1	Encodes a high-affinity molybdate transporter. Mutant has reduced concentrations of molybdate in roots and shoots, and reduced shoot and root length when growing on Mo-limited medium.	molybdate transporter 1 (MOT1); FUNCTIONS IN: molybdate ion transmembrane transporter activity, sulfate transmembrane transporter activity; INVOLVED IN: molybdate ion transport; LOCATED IN: mitochondrion, vacuole; EXPRESSED IN: 13 plant structures; EXPRESSED DURING: LP.04 four leaves visible, 4 anthesis, petal differentiation and expansion stage; BEST Arabidopsis thaliana protein match is: sulfat…
Potri.002G209700.v4.1		2.27604	4.51649	4.31941e-118	7.03964e-117	1.74485	4.16153	7.37051e-65	5.5249e-64	2.10959	4.44791	1.21795e-104	1.09733e-103	2.05356	4.40242	2.43704e-94	2.09412e-93	1.75532	4.20467	3.30934e-68	1.96786e-67	YES	YES	YES	YES	YES	4.52	4.27	10.43	22.76	15.88	13.32	21.04	13.34	18.58	20.31	15.49	16.99	AT1G03010.1	Phototropic-responsive NPH3 family protein		Phototropic-responsive NPH3 family protein; FUNCTIONS IN: signal transducer activity; INVOLVED IN: response to light stimulus, pollen tube growth; EXPRESSED IN: leaf apex, inflorescence meristem, cauline leaf, root, flower; EXPRESSED DURING: M germinated pollen stage, petal differentiation and expansion stage; CONTAINS InterPro DOMAIN/s: NPH3 (InterPro:IPR004249), BTB/POZ fold (InterPro:IPR011333…
Potri.018G003800.v4.1	NAC	-1.59353	1.74183	2.42047e-11	5.86942e-11	-2.53382	1.51936	1.83047e-21	5.92016e-21	-1.80922	1.71864	1.02181e-13	2.23029e-13	-2.54405	1.5617	4.82902e-21	1.35548e-20	-1.12603	1.89718	1.84546e-07	3.10607e-07	YES	YES	YES	YES	YES	4.47	4.9	10.39	1.55	0.96	13.31	1.08	13.05	0.67	1.04	2.15	2.54	AT2G24430.2	NAC domain containing protein 38		Arabidopsis NAC domain containing protein 39 (ANAC039); FUNCTIONS IN: sequence-specific DNA binding transcription factor activity; INVOLVED IN: multicellular organismal development, regulation of transcription; LOCATED IN: cellular_component unknown; EXPRESSED IN: stem, hypocotyl, root, leaf; EXPRESSED DURING: LP.04 four leaves visible, LP.02 two leaves visible; CONTAINS InterPro DOMAIN/s: No api…
Potri.001G462200.v4.1		3.99896	5.26327	0	0	4.95477	6.25132	0	0	2.3179	3.83552	1.97992e-81	1.43435e-80	4.26683	5.58915	0	0	3.03956	4.49819	3.65373e-186	5.47384e-185	YES	YES	YES	YES	YES	4.41	4.56	10.26	74.97	148.22	13.04	23.25	12.95	92.52	91.02	39.35	41.7	AT1G30700.1	FAD-binding Berberine family protein		FAD-binding Berberine family protein; FUNCTIONS IN: electron carrier activity, oxidoreductase activity, FAD binding, catalytic activity; LOCATED IN: endomembrane system; EXPRESSED IN: stem, hypocotyl, root, stamen; EXPRESSED DURING: 4 anthesis; CONTAINS InterPro DOMAIN/s: FAD-binding, type 2 (InterPro:IPR016166), Berberine/berberine-like (InterPro:IPR012951), FAD linked oxidase, N-terminal (Inter…
Potri.007G146900.v4.1		2.63886	4.37191	3.07478e-133	5.67935e-132	1.85002	3.79833	1.10404e-55	7.17348e-55	1.64635	3.64043	2.09e-41	8.82884e-41	1.41321	3.46485	2.0329e-28	6.77816e-28	1.82686	3.81318	1.17383e-56	6.05353e-56	YES	YES	YES	YES	YES	4.39	4.52	9.98	28.7	16.47	12.77	16	12.89	10.97	14.39	17.75	16.98	AT4G02600.2	Seven transmembrane MLO family protein	A member of a large family of seven-transmembrane domain proteins specific to plants, homologs of the barley mildew resistance locus o (MLO) protein. The Arabidopsis genome contains 15 genes encoding MLO proteins, with localization in plasma membrane. Phylogenetic analysis revealed four clades of closely-related AtMLO genes. ATMLO1 belongs to the clade II, with ATMLO13 and ATMLO15. The gene is ex…	MLO1; FUNCTIONS IN: calmodulin binding; INVOLVED IN: cell death, defense response; LOCATED IN: plasma membrane; EXPRESSED IN: 27 plant structures; EXPRESSED DURING: 15 growth stages; CONTAINS InterPro DOMAIN/s: Mlo-related protein (InterPro:IPR004326); BEST Arabidopsis thaliana protein match is: Seven transmembrane MLO family protein (TAIR:AT2G44110.1); Has 35333 Blast hits to 34131 proteins in 2…
Potri.008G158300.v4.1		1.05852	2.89726	6.59593e-12	1.64493e-11	1.0959	2.97292	4.07082e-14	1.02101e-13	1.42665	3.21113	1.31032e-24	3.89468e-24	1.2209	3.06137	3.24506e-17	8.15262e-17	1.25781	3.12229	3.80501e-19	9.68286e-19	YES	YES	YES	YES	YES	4.39	4.65	9.93	9.75	10.3	12.74	14.39	12.58	10.4	12.05	11.89	11.87	AT1G60680.1	NAD(P)-linked oxidoreductase superfamily protein		NAD(P)-linked oxidoreductase superfamily protein; FUNCTIONS IN: oxidoreductase activity, aldo-keto reductase activity; INVOLVED IN: oxidation reduction; EXPRESSED IN: hypocotyl, root; CONTAINS InterPro DOMAIN/s: Aldo/keto reductase (InterPro:IPR001395), Aldo/keto reductase subgroup (InterPro:IPR020471); BEST Arabidopsis thaliana protein match is: NAD(P)-linked oxidoreductase superfamily protein (…
Potri.012G129600.v4.1		1.33316	3.98191	2.95179e-34	1.49258e-33	1.21675	3.95525	9.61414e-30	3.84732e-29	1.48285	4.1514	2.22886e-48	1.05673e-47	1.5917	4.22937	3.70382e-56	2.01609e-55	1.3738	4.10415	1.65699e-42	6.92552e-42	YES	YES	YES	YES	YES	4.35	4.94	9.83	12.92	10.66	12.71	14.96	12.42	14.7	15.18	13.06	13.36	AT5G51600.1	Microtubule associated protein (MAP65/ASE1) family protein	Mutant has defective roots. Essential for giant cell ontogenesis. Role in organizing the mitotic microtubule array during both early and late mitosis in all plant organs.	PLEIADE (PLE); CONTAINS InterPro DOMAIN/s: Microtubule-associated protein, MAP65/ASE1-type (InterPro:IPR007145); BEST Arabidopsis thaliana protein match is: microtubule-associated protein 65-4 (TAIR:AT3G60840.1); Has 4514 Blast hits to 3795 proteins in 427 species: Archae - 120; Bacteria - 292; Metazoa - 2464; Fungi - 290; Plants - 515; Viruses - 1; Other Eukaryotes - 832 (source: NCBI BLink).
Potri.019G027100.v4.1		-8.51041	0.501582	4.08554e-24	1.58341e-23	-8.6151	0.41657	6.85193e-26	2.49034e-25	-8.5502	0.508376	8.94668e-25	2.66873e-24	-8.57493	0.472355	1.75953e-25	5.49925e-25	-8.58876	0.487526	1.92188e-25	5.72424e-25	YES	YES	YES	YES	YES	4.1	4.54	9.8	0	0	12.6	0	12.37	0	0	0	0	AT4G13440.1	Calcium-binding EF-hand family protein		Calcium-binding EF-hand family protein; FUNCTIONS IN: calcium ion binding; INVOLVED IN: biological_process unknown; LOCATED IN: cellular_component unknown; EXPRESSED IN: root; CONTAINS InterPro DOMAIN/s: EF-Hand 1, calcium-binding site (InterPro:IPR018247), EF-HAND 2 (InterPro:IPR018249), EF-hand-like domain (InterPro:IPR011992), Calcium-binding EF-hand (InterPro:IPR002048); Has 160 Blast hits to…
Potri.014G180100.v4.1		2.48292	5.54379	2.43865e-265	9.98266e-264	2.84859	5.92392	0	0	3.53219	6.53797	0	0	3.4175	6.43113	0	0	2.79688	5.91399	0	0	YES	YES	YES	YES	YES	4.06	3.32	9.65	21.78	28.75	12.27	47.98	12.09	41.84	41.96	27.8	28.12	AT3G60160.1	multidrug resistance-associated protein 9	member of MRP subfamily	multidrug resistance-associated protein 9 (MRP9); FUNCTIONS IN: ATPase activity, coupled to transmembrane movement of substances; INVOLVED IN: response to nematode; LOCATED IN: integral to membrane; EXPRESSED IN: root; CONTAINS InterPro DOMAIN/s: ATPase, AAA+ type, core (InterPro:IPR003593), ABC transporter-like (InterPro:IPR003439), ABC transporter, transmembrane domain, type 1 (InterPro:IPR0115…
Potri.008G097600.v4.1		2.211	3.33282	7.0505e-53	5.18215e-52	1.91314	3.16868	5.97201e-39	2.91431e-38	2.15268	3.35405	7.65866e-53	3.87603e-52	2.35336	3.52068	2.14281e-66	1.35235e-65	2.2055	3.43535	4.19777e-58	2.21587e-57	YES	YES	YES	YES	YES	4.05	3.57	9.5	17.56	14.02	11.95	19.4	12.07	21.24	20.02	19.46	19.17	AT3G08900.1	reversibly glycosylated polypeptide 3	Encodes a reversible autoglycosylated protein peripherally associated with cell membranes. Highly expressed in roots ans suspension-cultured cells.	reversibly glycosylated polypeptide 3 (RGP3); FUNCTIONS IN: transferase activity, transferring hexosyl groups, glycogenin glucosyltransferase activity; INVOLVED IN: cellulose biosynthetic process, cellular cell wall organization; LOCATED IN: membrane; EXPRESSED IN: leaf whorl, sepal, flower, cultured cell; EXPRESSED DURING: petal differentiation and expansion stage; CONTAINS InterPro DOMAIN/s: Al…
Potri.017G005400.v4.1		-3.26186	1.39874	2.4048e-24	9.39549e-24	-1.37815	1.6691	2.96416e-09	6.01872e-09	-1.40436	1.71866	1.86767e-09	3.48062e-09	-2.87215	1.42236	8.00366e-23	2.35638e-22	-1.22406	1.76947	6.12259e-08	1.05372e-07	YES	YES	YES	YES	YES	4.01	3.4	9.38	0.3	1.29	11.87	1.7	12.06	0.41	0.7	1.96	1.5	AT5G37980.1	Zinc-binding dehydrogenase family protein		Zinc-binding dehydrogenase family protein; FUNCTIONS IN: oxidoreductase activity, binding, catalytic activity, zinc ion binding; INVOLVED IN: response to oxidative stress, response to cyclopentenone; EXPRESSED IN: inflorescence meristem, leaf whorl, root; CONTAINS InterPro DOMAIN/s: GroES-like (InterPro:IPR011032), NAD(P)-binding domain (InterPro:IPR016040), Alcohol dehydrogenase, C-terminal (Int…
Potri.005G216100.v4.1		-1.62711	0.687429	1.8655e-06	3.48659e-06	-1.8925	0.589373	3.25418e-08	6.27166e-08	-1.49315	0.74296	4.94452e-06	7.82796e-06	-1.75779	0.657748	1.27352e-07	2.20585e-07	-1.9678	0.63513	1.44534e-08	2.55868e-08	YES	YES	YES	YES	YES	3.95	3.77	9.3	1.09	0.84	11.87	1.2	12.06	1.54	0.81	0.62	1.5	AT3G63420.2	Ggamma-subunit 1	heterotrimeric G protein gamma-subunit (AGG1) mRNA,	Ggamma-subunit 1 (GG1); FUNCTIONS IN: GTP binding; INVOLVED IN: defense response to fungus, incompatible interaction, acropetal auxin transport, seed germination, lateral root development; LOCATED IN: plasma membrane; EXPRESSED IN: 27 plant structures; EXPRESSED DURING: 13 growth stages; BEST Arabidopsis thaliana protein match is: G-protein gamma subunit 2 (TAIR:AT3G22942.1); Has 72 Blast hits to…
Potri.016G121400.v4.1		-1.8393	1.33721	5.97176e-11	1.42319e-10	-2.26132	1.21213	4.71005e-15	1.22579e-14	-2.22997	1.28736	1.47344e-14	3.30764e-14	-1.89303	1.32369	2.46259e-12	5.22581e-12	-2.12138	1.29913	7.24142e-14	1.57114e-13	YES	YES	YES	YES	YES	3.83	2.45	9.21	0.9	0.77	11.83	0.78	12.02	1.06	0.69	0.75	0.82	AT2G38290.1	ammonium transporter 2	encodes a high-affinity ammonium transporter, which is expressed in shoot and root. Expression in root and shoot is under nitrogen and carbon dioxide regulation, respectively.	ammonium transporter 2 (AMT2); FUNCTIONS IN: ammonium transmembrane transporter activity, high affinity secondary active ammonium transmembrane transporter activity; INVOLVED IN: ammonium transport, response to nematode, cellular response to nitrogen starvation; LOCATED IN: plasma membrane; EXPRESSED IN: 24 plant structures; EXPRESSED DURING: 13 growth stages; CONTAINS InterPro DOMAIN/s: Ammonium…
Potri.015G069800.v4.1		-4.84078	1.89429	3.49754e-48	2.36419e-47	-4.25825	1.84349	8.37013e-49	4.8912e-48	-4.7554	1.90737	1.16404e-50	5.71811e-50	-4.80397	1.87197	3.53455e-51	1.78685e-50	-5.95191	1.86011	8.03677e-58	4.21868e-57	YES	YES	YES	YES	YES	3.53	3.26	9.14	0.09	0.24	11.68	0.15	12.01	0.13	0.12	0.06	0.05	AT1G70140.1	formin 8	Encodes a group I formin. Binds to F-actin barbed ends. Has severing actin filaments activity. Binds profilin. Involved in the initiation and tip growth of root hairs through regulation of actin cytoskeleton.	formin 8 (FH8); FUNCTIONS IN: actin binding, profilin binding, actin filament binding; INVOLVED IN: actin nucleation, cell tip growth; LOCATED IN: cell-cell junction, plasma membrane; EXPRESSED IN: 17 plant structures; EXPRESSED DURING: 7 growth stages; CONTAINS InterPro DOMAIN/s: Actin-binding FH2/DRF autoregulatory (InterPro:IPR003104), Actin-binding FH2 (InterPro:IPR015425); BEST Arabidopsis t…
Potri.006G235000.v4.1		3.56868	3.93931	4.76049e-149	9.72605e-148	3.62635	4.08349	1.91181e-171	3.68524e-170	3.87165	4.29283	4.20102e-211	7.53512e-210	3.91135	4.33574	1.06872e-212	2.1588e-211	3.58607	4.0741	9.15078e-172	1.26603e-170	YES	YES	YES	YES	YES	3.52	3.44	9.12	42.39	45.51	11.62	52.89	11.87	54.57	56.46	47.77	44.49	AT4G32830.1	ataurora1	Encodes a member of a family of Ser/Thr kinases whose activities peak during cell division. Transcripts are abundant in tissues rich in dividing cells like roots and flowers but are low or absent in fully expanded leaves and stems. In interphase cells, the protein is predominantly nuclear. During mitosis, the protein associates with plant-specific cytoskeletal structures (preprophase band, phragm…	ataurora1 (AUR1); CONTAINS InterPro DOMAIN/s: Spindle assembly checkpoint kinase (InterPro:IPR020663), Protein kinase, ATP binding site (InterPro:IPR017441), Protein kinase, catalytic domain (InterPro:IPR000719), Serine/threonine-protein kinase domain (InterPro:IPR002290), Calcium/calmodulin-dependent protein kinase-like (InterPro:IPR020636), Serine/threonine-protein kinase-like domain (InterPro:…
Potri.006G021000.v4.1	ERF	-7.74309	-0.193146	3.53348e-15	1.01681e-14	-7.84728	-0.278798	4.35795e-16	1.17343e-15	-7.78263	-0.186635	1.56738e-15	3.61775e-15	-7.80704	-0.222786	7.15038e-16	1.72219e-15	-7.82095	-0.207673	6.61063e-16	1.5341e-15	YES	YES	YES	YES	YES	3.36	2.25	8.97	0	0	11.41	0	11.84	0	0	0	0	AT2G36450.1	Integrase-type DNA-binding superfamily protein	encodes a member of the DREB subfamily A-4 of ERF/AP2 transcription factor family. The protein contains one AP2 domain. There are 17 members in this subfamily including TINY. Ectopic overexpression of HRD increases the density of the root network and improves water and salt stress tolerance in Arabidopsis. Overexpression of HRD in rice causes an increase in plant biomass and drought resistance.	HARDY (HRD); CONTAINS InterPro DOMAIN/s: DNA-binding, integrase-type (InterPro:IPR016177), Pathogenesis-related transcriptional factor/ERF, DNA-binding (InterPro:IPR001471); BEST Arabidopsis thaliana protein match is: C-repeat-binding factor 4 (TAIR:AT5G51990.1); Has 5681 Blast hits to 5646 proteins in 245 species: Archae - 0; Bacteria - 4; Metazoa - 0; Fungi - 0; Plants - 5670; Viruses - 0; Othe…
Potri.009G070800.v4.1	SRS	2.11301	4.37919	1.51488e-95	1.95438e-94	2.92631	5.1412	1.70603e-265	5.29876e-264	3.54139	5.68857	0	0	3.8044	5.93255	0	0	3.28864	5.49765	0	0	YES	YES	YES	YES	YES	3.31	3.2	8.94	15.07	26.29	11.32	42.39	11.78	48.52	48.34	34.61	35.03	AT5G12330.2	Lateral root primordium (LRP) protein-related	A member of SHI gene family. Arabidopsis thaliana has ten members that encode proteins with a RING finger-like zinc finger motif. Despite being highly divergent in sequence, many of the SHI-related genes are partially redundant in function and synergistically promote gynoecium, stamen and leaf development in Arabidopsis. Expressed in lateral root primordia and induced by auxin. SWP1 is involved i…	LATERAL ROOT PRIMORDIUM 1 (LRP1); FUNCTIONS IN: protein homodimerization activity; INVOLVED IN: response to auxin stimulus, root development; LOCATED IN: cellular_component unknown; EXPRESSED IN: 15 plant structures; EXPRESSED DURING: 7 growth stages; CONTAINS InterPro DOMAIN/s: Lateral Root Primordium type 1, C-terminal (InterPro:IPR006511), Zinc finger, Lateral Root Primordium type 1 (InterPro:…
Potri.005G135300.v4.1		3.3307	3.4029	1.99172e-97	2.6156e-96	2.81783	3.04142	8.13916e-64	6.00396e-63	2.34928	2.63378	1.87959e-37	7.38306e-37	3.4873	3.62733	1.60342e-119	1.75326e-118	5.21577	5.30052	0	0	YES	YES	YES	YES	YES	3.25	2.17	8.62	30.47	19.76	11.27	17.11	11.64	32.13	31.94	112.17	108.75	AT1G49570.1	Peroxidase superfamily protein		Peroxidase superfamily protein; FUNCTIONS IN: peroxidase activity, heme binding; INVOLVED IN: oxidation reduction, response to oxidative stress; LOCATED IN: endomembrane system; EXPRESSED IN: leaf lamina base, leaf whorl, hypocotyl, sepal, root; EXPRESSED DURING: 4 anthesis; CONTAINS InterPro DOMAIN/s: Haem peroxidase (InterPro:IPR010255), Plant peroxidase (InterPro:IPR000823), Peroxidases heam-l…
Potri.009G013900.v4.1		2.24984	2.61046	2.54733e-34	1.29007e-33	4.07456	4.31415	9.74096e-220	2.46395e-218	5.52163	5.68785	0	0	5.94618	6.10573	0	0	6.18197	6.37554	0	0	YES	YES	YES	YES	YES	3.2	2.5	8.6	15.28	54.71	10.88	143.79	11.58	191.71	179.58	226.5	228.28	AT2G37170.1	plasma membrane intrinsic protein 2	a member of the plasma membrane intrinsic protein subfamily PIP2. localizes to the plasma membrane and exhibits water transport activity in Xenopus oocyte. expressed specifically in the vascular bundles and protein level increases slightly during leaf dev	plasma membrane intrinsic protein 2 (PIP2B); FUNCTIONS IN: water channel activity; INVOLVED IN: response to water deprivation, response to salt stress, transport, water transport; LOCATED IN: plasma membrane, chloroplast, membrane; EXPRESSED IN: root, cultured cell, callus; EXPRESSED DURING: seedling growth; CONTAINS InterPro DOMAIN/s: Major intrinsic protein, conserved site (InterPro:IPR022357),…
Potri.001G012901.v4.1		1.94164	2.5359	5.28701e-26	2.1588e-25	2.88146	3.39715	6.49799e-83	6.09055e-82	3.52532	3.95833	2.79893e-153	3.5997e-152	3.0441	3.53068	2.47491e-95	2.15576e-94	2.04958	2.72947	1.2653e-32	4.40038e-32	YES	YES	YES	YES	YES	3.07	2.93	8.48	13.11	23.52	10.84	38.74	11.49	26.71	25.95	12.39	14.97	AT5G06730.1	Peroxidase superfamily protein		Peroxidase superfamily protein; FUNCTIONS IN: peroxidase activity, heme binding; INVOLVED IN: response to oxidative stress, oxidation reduction; LOCATED IN: plasma membrane; EXPRESSED IN: root, cultured cell; CONTAINS InterPro DOMAIN/s: Haem peroxidase (InterPro:IPR010255), Plant peroxidase (InterPro:IPR000823), Peroxidases heam-ligand binding site (InterPro:IPR019793), Haem peroxidase, plant/fun…
Potri.007G089000.v4.1		2.02376	3.76911	6.94746e-61	5.76899e-60	2.41908	4.16657	8.34754e-108	1.00526e-106	2.88305	4.55706	5.00824e-177	7.46199e-176	3.35358	4.98008	3.76549e-269	1.00668e-267	1.28512	3.31372	2.02854e-22	5.62431e-22	YES	YES	YES	YES	YES	3.05	3.16	8.47	13.26	18.62	10.62	26.17	11.45	34.93	32.63	8.37	8.23	AT2G22240.1	myo-inositol-1-phosphate synthase 2	** Referred to as MIPS1 in Mitsuhashi et al 2008. Myo-inositol-1-phosphate synthase isoform 2. Expressed in leaf, root and silique. Immunolocalization experiments with an antibody recognizing MIPS1, MIPS2, and MIPS3 showed endosperm localization.	myo-inositol-1-phosphate synthase 2 (MIPS2); CONTAINS InterPro DOMAIN/s: Myo-inositol-1-phosphate synthase (InterPro:IPR002587), Myo-inositol-1-phosphate synthase, GAPDH-like (InterPro:IPR013021), NAD(P)-binding domain (InterPro:IPR016040); BEST Arabidopsis thaliana protein match is: myo-inositol-1-phosphate synthase 1 (TAIR:AT4G39800.1); Has 1859 Blast hits to 1855 proteins in 512 species: Archa…
Potri.014G038000.v4.1		1.7225	2.59312	4.12937e-22	1.50393e-21	2.04739	2.91571	2.73611e-37	1.29458e-36	2.2856	3.10094	3.31955e-49	1.59321e-48	2.58444	3.35437	3.61563e-68	2.33376e-67	2.96089	3.71799	2.50271e-107	2.2292e-106	YES	YES	YES	YES	YES	2.93	2.32	8.36	8.75	11.3	10.47	14.1	11.3	17.39	15.89	22.42	22.35	AT4G31940.1	cytochrome P450, family 82, subfamily C, polypeptide 4	member of CYP82C	cytochrome P450, family 82, subfamily C, polypeptide 4 (CYP82C4); FUNCTIONS IN: electron carrier activity, monooxygenase activity, iron ion binding, oxygen binding, heme binding; INVOLVED IN: oxidation reduction; LOCATED IN: endomembrane system; EXPRESSED IN: root; CONTAINS InterPro DOMAIN/s: Cytochrome P450 (InterPro:IPR001128), Cytochrome P450, E-class, group I (InterPro:IPR002401), Cytochrome …
Potri.014G102200.v4.1		1.55688	2.23604	3.768e-15	1.08306e-14	1.6542	2.3712	7.33694e-19	2.18505e-18	1.92155	2.57418	5.96102e-27	1.87414e-26	1.78639	2.47107	2.65704e-22	7.7099e-22	2.26001	2.88239	5.43017e-42	2.24761e-41	YES	YES	YES	YES	YES	2.92	2.99	8.35	8.36	10.34	10.43	13.51	11.13	11.69	9.87	15.31	15.87	AT1G01200.1	RAB GTPase homolog A3		RAB GTPase homolog A3 (RABA3); FUNCTIONS IN: GTP binding; INVOLVED IN: protein transport, small GTPase mediated signal transduction; LOCATED IN: endosome, nucleus, cell plate; EXPRESSED IN: lateral root cap, hypocotyl, root, flower, epidermis; EXPRESSED DURING: petal differentiation and expansion stage; CONTAINS InterPro DOMAIN/s: Ras GTPase (InterPro:IPR001806), Small GTP-binding protein (InterP…
Potri.003G176800.v4.1		4.99122	5.27071	0	0	5.84648	6.18366	0	0	6.48482	6.80708	0	0	6.39515	6.71737	0	0	6.24542	6.60828	0	0	YES	YES	YES	YES	YES	2.81	1.96	8.18	80.89	147.16	10.31	231.1	11.12	213.42	209.78	195.69	199.17	AT5G13930.1	Chalcone and stilbene synthase family protein	Encodes chalcone synthase (CHS), a key enzyme involved in the biosynthesis of flavonoids. Required for the accumulation of purple anthocyanins in leaves and stems. Also involved in the regulation of auxin transport and the modulation of root gravitropism.	TRANSPARENT TESTA 4 (TT4); FUNCTIONS IN: naringenin-chalcone synthase activity; INVOLVED IN: in 11 processes; LOCATED IN: plant-type vacuole membrane, endoplasmic reticulum, nucleus; EXPRESSED IN: 22 plant structures; EXPRESSED DURING: 14 growth stages; CONTAINS InterPro DOMAIN/s: Chalcone/stilbene synthase, N-terminal (InterPro:IPR001099), Thiolase-like (InterPro:IPR016039), Polyketide synthase,…
Potri.014G182500.v4.1		-8.36822	0.368504	3.03e-22	1.10744e-21	-5.35157	0.314018	7.09509e-21	2.24673e-20	-1.58216	0.754882	1.48505e-06	2.41159e-06	-4.36088	0.399924	2.0552e-18	5.36178e-18	-1.93961	0.672986	1.0548e-08	1.87691e-08	YES	YES	YES	YES	YES	2.78	2.2	8.09	0	0.15	10.22	1.2	11.1	0.11	0.13	0.48	0.92	AT2G16230.1	O-Glycosyl hydrolases family 17 protein		O-Glycosyl hydrolases family 17 protein; FUNCTIONS IN: cation binding, hydrolase activity, hydrolyzing O-glycosyl compounds, catalytic activity; INVOLVED IN: carbohydrate metabolic process; LOCATED IN: endomembrane system; EXPRESSED IN: root; CONTAINS InterPro DOMAIN/s: X8 (InterPro:IPR012946), Glycoside hydrolase, catalytic core (InterPro:IPR017853), Glycoside hydrolase, family 17 (InterPro:IPR0…
Potri.009G020100.v4.1		1.01721	3.29363	4.09832e-14	1.12546e-13	1.04094	3.35976	5.85832e-16	1.57012e-15	1.4692	3.66629	1.31871e-34	4.88839e-34	1.49228	3.68126	1.67732e-35	6.49021e-35	1.26475	3.55312	2.92018e-25	8.65813e-25	YES	YES	YES	YES	YES	2.76	2.41	8.02	5.97	5.37	10.21	7.85	10.84	7.64	7.83	6.07	7.46	AT3G44200.1	NIMA (never in mitosis, gene A)-related 6	Encodes AtNek5, a member of the NIMA-related serine/threonine kinases (Neks) that have been linked to cell-cycle regulation in fungi and mammals. Plant Neks might be involved in plant development processes.Interacts physically with plant kinesins ARK1 and ARK2. Mutants show defects in root epidermal cell morphology, trichome branching and other epidermal cell abnormalities suggesting a rol e in e…	NIMA (never in mitosis, gene A)-related 6 (NEK6); FUNCTIONS IN: protein serine/threonine kinase activity, protein kinase activity, kinase activity, ATP binding; INVOLVED IN: microtubule-based process, epidermal cell differentiation; LOCATED IN: cortical microtubule; EXPRESSED IN: 22 plant structures; EXPRESSED DURING: 13 growth stages; CONTAINS InterPro DOMAIN/s: Protein kinase, ATP binding site …
Potri.014G088000.v4.1		1.80207	3.01239	2.66086e-31	1.25863e-30	2.87696	3.97674	1.71506e-119	2.27987e-118	3.05647	4.12228	2.57466e-144	3.10805e-143	3.07863	4.14583	4.44486e-144	5.92807e-143	3.59428	4.65194	4.51856e-249	9.33332e-248	YES	YES	YES	YES	YES	2.67	1.85	8.01	8.37	17.33	10.07	21.17	10.81	20.25	20.2	29.31	30.26	AT1G01580.1	ferric reduction oxidase 2	Encodes the low-iron-inducible ferric chelate reductase responsible for reduction of iron at the root surface. It is likely to be the major Fe(III) chelate reductase in Arabidopsis iron metabolism. Coordinately regulated with IRT1, the major transporter responsible for high-affinity iron uptake from the soil, at both transcriptional and posttranscriptional levels. Steady state mRNA levels are reg…	ferric reduction oxidase 2 (FRO2); CONTAINS InterPro DOMAIN/s: Ferredoxin reductase-type FAD-binding domain (InterPro:IPR017927), Ferric reductase, NAD binding (InterPro:IPR013121), FAD-binding 8 (InterPro:IPR013112), Riboflavin synthase-like beta-barrel (InterPro:IPR017938), Ferric reductase-like transmembrane component, N-terminal (InterPro:IPR013130); BEST Arabidopsis thaliana protein match is…
Potri.018G089900.v4.1		2.62712	2.99476	5.05201e-55	3.81191e-54	3.98405	4.29982	2.8243e-217	7.05162e-216	3.76587	4.07914	1.0732e-178	1.61858e-177	5.97045	6.2	0	0	5.96768	6.23605	0	0	YES	YES	YES	YES	YES	2.66	2.55	7.99	15.12	45.11	10.05	37.89	10.41	177.14	169.62	180.32	178.91	AT4G30170.1	Peroxidase family protein		Peroxidase family protein; FUNCTIONS IN: peroxidase activity, heme binding; INVOLVED IN: oxidation reduction, response to oxidative stress; LOCATED IN: endomembrane system; EXPRESSED IN: hypocotyl, root; CONTAINS InterPro DOMAIN/s: Haem peroxidase (InterPro:IPR010255), Plant peroxidase (InterPro:IPR000823), Peroxidases heam-ligand binding site (InterPro:IPR019793), Haem peroxidase, plant/fungal/b…
Potri.004G169400.v4.1		1.72134	2.24041	1.23732e-17	3.90534e-17	1.58295	2.20155	1.03661e-15	2.75408e-15	-1.98986	0.604276	2.39216e-08	4.23711e-08	-1.84212	0.607195	6.15197e-08	1.08326e-07	-1.74914	0.647913	1.91477e-07	3.21834e-07	YES	YES	YES	YES	YES	2.49	2.06	7.85	7.05	7.57	10	0.48	10.31	0.82	0.49	0.68	0.79	AT4G34880.1	Amidase family protein		Amidase family protein; FUNCTIONS IN: amidase activity, carbon-nitrogen ligase activity, with glutamine as amido-N-donor; INVOLVED IN: acrylonitrile catabolic process, aldoxime metabolic process; LOCATED IN: endomembrane system; EXPRESSED IN: root; CONTAINS InterPro DOMAIN/s: Amidase (InterPro:IPR000120); BEST Arabidopsis thaliana protein match is: Amidase family protein (TAIR:AT5G07360.2); Has 1…
Potri.007G063300.v4.1	GRAS	1.7815	3.07591	4.86765e-32	2.33752e-31	2.45953	3.69825	5.949e-80	5.37591e-79	2.48132	3.70566	8.67917e-83	6.35052e-82	2.87339	4.04627	3.9968e-124	4.53234e-123	2.79854	4.01924	4.13906e-123	4.14718e-122	YES	YES	YES	YES	YES	2.48	2.91	7.83	10.8	14.89	9.85	15.75	9.4	20.99	21.16	20.99	20.32	AT4G37650.1	GRAS family transcription factor	Involved in radial organization of the root and shoot axial organs. Essential for normal shoot gravitropism. The protein moves in a highly specific manner from the cells of the stele in which it is synthesized outward. Movement requires sequences within the GRAS and VHIID domains.	SHORT ROOT (SHR); CONTAINS InterPro DOMAIN/s: Transcription factor GRAS (InterPro:IPR005202); BEST Arabidopsis thaliana protein match is: GRAS family transcription factor (TAIR:AT3G49950.1); Has 2470 Blast hits to 2429 proteins in 304 species: Archae - 0; Bacteria - 4; Metazoa - 9; Fungi - 15; Plants - 2427; Viruses - 0; Other Eukaryotes - 15 (source: NCBI BLink).
Potri.012G144900.v4.1		2.25922	2.96951	2.56289e-43	1.58181e-42	1.8968	2.75519	1.02639e-29	4.10593e-29	3.37119	3.99939	6.20951e-150	7.79753e-149	2.73918	3.44535	3.8103e-78	2.78018e-77	2.11959	2.96364	5.16204e-40	2.06499e-39	YES	YES	YES	YES	YES	2.46	1.64	7.65	9.82	7.62	9.71	23.26	9.07	14.88	14.07	10.05	9.43	AT4G25640.1	detoxifying efflux carrier 35	Encodes a multidrug and toxin efflux family transporter. Involved in flavonoid metabolism, affecting Root growth, seed development and germination, and pollen development, release and viability.	detoxifying efflux carrier 35 (DTX35); FUNCTIONS IN: antiporter activity, drug transmembrane transporter activity; INVOLVED IN: anther dehiscence, flavonoid metabolic process, pollen development; LOCATED IN: plasma membrane, membrane; EXPRESSED IN: 25 plant structures; EXPRESSED DURING: 13 growth stages; CONTAINS InterPro DOMAIN/s: Multi antimicrobial extrusion protein MatE (InterPro:IPR002528); …
Potri.013G076100.v4.1		1.35521	2.76801	1.04039e-16	3.17014e-16	1.91865	3.25396	4.68008e-42	2.42102e-41	2.75324	3.93855	1.28583e-111	1.22447e-110	2.56646	3.78085	4.98006e-90	4.0998e-89	1.80729	3.20121	1.28215e-36	4.80368e-36	YES	YES	YES	YES	YES	2.44	2.87	7.63	7.14	11.02	9.64	20.28	8.93	16.32	17.24	9.21	11.16	AT5G17520.1	root cap 1 (RCP1)	Encodes a maltose transporter that is expressed in leaves and roots. Mutations at the MEX1 locus cause accumulation of both starch and maltose in leaves, with maltose levels at least 40 times higher than that of wild-type. This gene encodes a protein located in the chloroplast envelope.	ROOT CAP 1 (RCP1); FUNCTIONS IN: maltose transmembrane transporter activity; INVOLVED IN: in 7 processes; LOCATED IN: chloroplast inner membrane, chloroplast envelope; EXPRESSED IN: 23 plant structures; EXPRESSED DURING: 15 growth stages; BEST Arabidopsis thaliana protein match is: unknown protein (TAIR:AT5G17523.1); Has 30201 Blast hits to 17322 proteins in 780 species: Archae - 12; Bacteria - 1…
Potri.001G089000.v4.1		1.53167	1.79093	3.05421e-11	7.37078e-11	2.15012	2.33391	1.68662e-27	6.39486e-27	2.35709	2.49432	8.13905e-35	3.02879e-34	3.07861	3.11521	1.55554e-73	1.07253e-72	2.60713	2.74171	5.0102e-47	2.23939e-46	YES	YES	YES	YES	YES	2.4	2.46	7.53	7.91	10.91	9.57	15.04	8.84	23.03	20.5	17.65	15.13	AT3G61920.1			unknown protein; FUNCTIONS IN: molecular_function unknown; INVOLVED IN: N-terminal protein myristoylation; LOCATED IN: cellular_component unknown; EXPRESSED IN: shoot, hypocotyl, root, egg cell; BEST Arabidopsis thaliana protein match is: unknown protein (TAIR:AT1G64700.1); Has 77 Blast hits to 77 proteins in 8 species: Archae - 0; Bacteria - 0; Metazoa - 0; Fungi - 0; Plants - 77; Viruses - 0; O…
Potri.008G161200.v4.1		2.24875	2.12618	3.06731e-25	1.22579e-24	4.19298	3.9361	1.14842e-176	2.28403e-175	4.418	4.12944	1.62747e-214	2.94619e-213	5.5411	5.2176	0	0	4.75003	4.49336	1.08599e-290	2.64258e-289	YES	YES	YES	YES	YES	2.38	1.55	7.49	9.89	40.19	9.24	45.81	8.77	96.81	96.14	57.16	58.66	AT4G14550.1	indole-3-acetic acid inducible 14	IAA14 is a member of the Aux/IAA protein family. Involved in lateral root development. Gain of function mutation decreases auxin-inducible gene expression. Protein is localized to the nucleus. Expressed in stele and root tip epidermis. Functions as a negative regulator of ARF7/19.	indole-3-acetic acid inducible 14 (IAA14); CONTAINS InterPro DOMAIN/s: Aux/IAA-ARF-dimerisation (InterPro:IPR011525), AUX/IAA protein (InterPro:IPR003311); BEST Arabidopsis thaliana protein match is: indole-3-acetic acid 7 (TAIR:AT3G23050.1); Has 30201 Blast hits to 17322 proteins in 780 species: Archae - 12; Bacteria - 1396; Metazoa - 17338; Fungi - 3422; Plants - 5037; Viruses - 0; Other Eukary…
Potri.019G057500.v4.1		6.2688	6.57681	0	0	6.10935	6.48676	0	0	6.24608	6.61867	0	0	6.09026	6.46503	0	0	5.57396	5.99874	0	0	YES	YES	YES	YES	YES	2.37	2.64	7.48	198.91	189.28	9.23	210.78	8.76	189.57	174.21	132.08	131.56	AT2G40610.1	expansin A8	member of Alpha-Expansin Gene Family. Naming convention from the Expansin Working Group (Kende et al, 2004. Plant Mol Bio). Involved in the formation of nematode-induced syncytia in roots of Arabidopsis thaliana.	expansin A8 (EXPA8); INVOLVED IN: plant-type cell wall modification involved in multidimensional cell growth, syncytium formation, unidimensional cell growth, plant-type cell wall loosening; LOCATED IN: endomembrane system, extracellular region; EXPRESSED IN: 21 plant structures; EXPRESSED DURING: 10 growth stages; CONTAINS InterPro DOMAIN/s: Pollen allergen, N-terminal (InterPro:IPR014734), Rare…
Potri.017G064100.v4.1		1.39494	1.8193	7.2402e-10	1.63558e-09	2.23408	2.52581	2.47135e-33	1.07816e-32	1.90779	2.25837	1.03819e-21	2.86601e-21	2.75949	2.95862	5.59056e-58	3.12617e-57	2.52162	2.79642	1.7365e-46	7.70445e-46	YES	YES	YES	YES	YES	2.36	3.01	7.02	7.23	13.76	9.08	10.46	8.51	18.12	20.74	16.09	18.06	AT5G67400.1	root hair specific 19		root hair specific 19 (RHS19); FUNCTIONS IN: peroxidase activity, heme binding; INVOLVED IN: oxidation reduction, response to oxidative stress; LOCATED IN: endomembrane system; EXPRESSED IN: root hair, root; CONTAINS InterPro DOMAIN/s: Haem peroxidase (InterPro:IPR010255), Plant peroxidase (InterPro:IPR000823), Peroxidases heam-ligand binding site (InterPro:IPR019793), Haem peroxidase, plant/fung…
Potri.019G049500.v4.1		4.03241	5.2949	0	0	4.58285	5.89544	0	0	5.25951	6.54285	0	0	5.07275	6.36108	0	0	4.79003	6.12732	0	0	YES	YES	YES	YES	YES	2.34	2.62	6.93	41.86	65.94	8.91	104.39	8.44	89.31	88.87	74.5	76.28	AT1G65060.1	4-coumarate:CoA ligase 3	encodes an isoform of 4-coumarate:CoA ligase (4CL), which is involved in the last step of the general phenylpropanoid pathway. mRNA levels are not induced in response to wounding or to fungal infection by P. parasitica. mRNA is expressed in flowers, to a lesser degree in mature leaves and siliques and marginally in seedling roots and bolting stems of mature plants. The catalytic efficiency was in…	4-coumarate:CoA ligase 3 (4CL3); CONTAINS InterPro DOMAIN/s: AMP-binding, conserved site (InterPro:IPR020845), AMP-dependent synthetase/ligase (InterPro:IPR000873); BEST Arabidopsis thaliana protein match is: 4-coumarate:CoA ligase 2 (TAIR:AT3G21240.1); Has 85516 Blast hits to 77968 proteins in 3765 species: Archae - 1155; Bacteria - 54010; Metazoa - 3516; Fungi - 4668; Plants - 2834; Viruses - 1…
Potri.002G152300.v4.1		1.65801	2.5034	7.19585e-20	2.45101e-19	1.13492	2.18932	2.06455e-09	4.2295e-09	1.40637	2.3831	2.2171e-14	4.94998e-14	1.44636	2.41009	2.32712e-15	5.50032e-15	1.69359	2.62786	6.71534e-23	1.88344e-22	YES	YES	YES	YES	YES	2.3	3.15	6.91	8.1	6.23	8.89	7.66	8.38	7.75	8.1	10.18	9.31	AT2G45690.1	shrunken seed protein (SSE1)	Encodes a protein with similarity to yeast Pep16p, a membrane localized protein involved in peroxisome assembly and protein-trafficking. SSE1 mutant seeds do not accumulate oils and dessicated seeds have a shrunken appearance. Involved in protein and oil body biogenesis. SSE is expressed during seed development, reaching the highest peak in mature siliques. Expression in leaves and roots is low c…	SHRUNKEN SEED 1 (SSE1); CONTAINS InterPro DOMAIN/s: Peroxisome membrane protein, Pex16 (InterPro:IPR013919); Has 261 Blast hits to 259 proteins in 120 species: Archae - 0; Bacteria - 0; Metazoa - 102; Fungi - 93; Plants - 47; Viruses - 0; Other Eukaryotes - 19 (source: NCBI BLink).
Potri.011G158100.v4.1		2.85142	3.43699	2.10886e-81	2.31791e-80	4.39095	4.93394	0	0	4.55307	5.07408	0	0	5.50805	5.99978	0	0	4.72983	5.28698	0	0	YES	YES	YES	YES	YES	2.16	2.53	6.91	16.18	53.17	8.83	61.96	8.06	109.31	118.22	69.35	67.69	AT5G44390.1	FAD-binding Berberine family protein		FAD-binding Berberine family protein; FUNCTIONS IN: electron carrier activity, oxidoreductase activity, FAD binding, catalytic activity; LOCATED IN: endomembrane system; EXPRESSED IN: cotyledon, embryo, hypocotyl, root, stamen; EXPRESSED DURING: 4 anthesis, C globular stage; CONTAINS InterPro DOMAIN/s: FAD-linked oxidase, FAD-binding, subdomain 2 (InterPro:IPR016168), FAD-binding, type 2 (InterPr…
Potri.004G208300.v4.1		1.59867	1.96535	2.36707e-13	6.31116e-13	1.90681	2.26529	6.71338e-22	2.19578e-21	1.87238	2.23297	1.6835e-20	4.49221e-20	1.2751	1.79416	8.93282e-09	1.63439e-08	1.50544	1.99432	2.16592e-12	4.44454e-12	YES	YES	YES	YES	YES	2.16	1.57	6.81	5.6	6.81	8.71	7.28	8.06	4	5.63	5.84	5.78	AT4G38210.1	expansin A20	expansin -like protein. Naming convention from the Expansin Working Group (Kende et al, 2004. Plant Mol Bio). Involved in the formation of nematode-induced syncytia in roots of Arabidopsis thaliana.	expansin A20 (EXPA20); INVOLVED IN: plant-type cell wall modification involved in multidimensional cell growth, response to karrikin, syncytium formation, unidimensional cell growth, plant-type cell wall loosening; LOCATED IN: endomembrane system, extracellular region; EXPRESSED IN: 8 plant structures; EXPRESSED DURING: 6 growth stages; CONTAINS InterPro DOMAIN/s: Barwin-related endoglucanase (In…
Potri.011G102100.v4.1	STAT	1.08279	2.91933	1.29249e-12	3.32436e-12	1.02708	2.93417	2.764e-12	6.45778e-12	1.40561	3.20455	6.34962e-24	1.8518e-23	1.22419	3.07278	2.27451e-17	5.74865e-17	1.24793	3.12257	8.71435e-19	2.19761e-18	YES	YES	YES	YES	YES	2.16	2.12	6.74	5.43	4.67	8.43	6.93	8.04	5.28	5.38	5.97	5.19	AT1G78540.1	SH2 domain protein B	Encodes a protein that contains an SH2 domain. It can pull down a 120-kD tyrosine-phosphorylated protein in vitro. It is predicted to act as a transcription factor.	SH2 domain protein B (SHB); FUNCTIONS IN: sequence-specific DNA binding transcription factor activity, signal transducer activity; INVOLVED IN: signal transduction, regulation of transcription, DNA-dependent; LOCATED IN: nucleus; EXPRESSED IN: stem, flower, root, leaf; CONTAINS InterPro DOMAIN/s: SH2 motif (InterPro:IPR000980), STAT transcription factor, core (InterPro:IPR001217), Concanavalin A-…
Potri.010G231500.v4.1		2.07045	2.37492	4.45448e-26	1.82378e-25	2.29691	2.63598	1.29102e-36	6.02234e-36	1.68845	2.15343	9.26009e-17	2.21899e-16	3.54259	3.71423	2.60245e-129	3.09261e-128	2.34597	2.70847	3.56563e-39	1.4065e-38	YES	YES	YES	YES	YES	2.12	2.09	6.74	10.09	12.2	8.38	8.51	7.99	23.7	28.58	11.24	12.28	AT2G36690.1	2-oxoglutarate (2OG) and Fe(II)-dependent oxygenase superfamily protein		2-oxoglutarate (2OG) and Fe(II)-dependent oxygenase superfamily protein; FUNCTIONS IN: oxidoreductase activity, acting on paired donors, with incorporation or reduction of molecular oxygen, 2-oxoglutarate as one donor, and incorporation of one atom each of oxygen into both donors, oxidoreductase activity; INVOLVED IN: biosynthetic process; LOCATED IN: cellular_component unknown; EXPRESSED IN: hyp…
Potri.003G176900.v4.1		5.81747	5.94518	0	0	6.70012	6.88356	0	0	7.28337	7.46351	0	0	7.03078	7.20935	0	0	6.83942	7.05756	0	0	YES	YES	YES	YES	YES	2.08	2.44	6.61	129.96	256.85	8.21	397.68	7.79	313.73	318.93	286.69	287.08	AT5G13930.1	Chalcone and stilbene synthase family protein	Encodes chalcone synthase (CHS), a key enzyme involved in the biosynthesis of flavonoids. Required for the accumulation of purple anthocyanins in leaves and stems. Also involved in the regulation of auxin transport and the modulation of root gravitropism.	TRANSPARENT TESTA 4 (TT4); FUNCTIONS IN: naringenin-chalcone synthase activity; INVOLVED IN: in 11 processes; LOCATED IN: plant-type vacuole membrane, endoplasmic reticulum, nucleus; EXPRESSED IN: 22 plant structures; EXPRESSED DURING: 14 growth stages; CONTAINS InterPro DOMAIN/s: Chalcone/stilbene synthase, N-terminal (InterPro:IPR001099), Thiolase-like (InterPro:IPR016039), Polyketide synthase,…
Potri.007G065400.v4.1	NAC	1.08453	1.50992	1.16113e-05	2.05722e-05	1.47611	1.83503	2.68776e-11	5.9984e-11	2.02743	2.2498	9.65352e-24	2.80278e-23	1.78612	2.0656	2.10414e-17	5.32089e-17	2.33003	2.53463	1.9396e-34	6.98411e-34	YES	YES	YES	YES	YES	2.08	2.64	6.39	5.49	6.51	8.18	10.91	7.73	9.42	7.88	11.55	14.69	AT1G56010.2	NAC domain containing protein 1	Encodes a transcription factor involved in shoot apical meristem formation and auxin-mediated lateral root formation. The gene is thought not to be involved in stress responses (NaCl, auxins, ethylene). NAC1 (NAC1)	NAC domain containing protein 1 (NAC1); CONTAINS InterPro DOMAIN/s: No apical meristem (NAM) protein (InterPro:IPR003441); BEST Arabidopsis thaliana protein match is: NAC (No Apical Meristem) domain transcriptional regulator superfamily protein (TAIR:AT3G12977.1); Has 2928 Blast hits to 2921 proteins in 75 species: Archae - 0; Bacteria - 0; Metazoa - 0; Fungi - 0; Plants - 2928; Viruses - 0; Othe…
Potri.004G139900.v4.1		1.28129	3.21761	4.17546e-20	1.43296e-19	1.68198	3.57107	4.43986e-41	2.25447e-40	1.99916	3.81532	6.70194e-64	3.92377e-63	1.85628	3.70347	2.75169e-52	1.41694e-51	1.84935	3.7337	4.55655e-55	2.30286e-54	YES	YES	YES	YES	YES	2.07	2.73	6.35	6.24	8.27	8.14	10.28	7.58	9.15	9.45	10.11	8.94	AT1G21980.1	phosphatidylinositol-4-phosphate 5-kinase 1	Type I phosphatidylinositol-4-phosphate 5-kinase. Preferentially phosphorylates PtdIns4P. Induced by water stress and abscisic acid in Arabidopsis thaliana. Expressed in procambial cells of leaves, flowers and roots. A N-terminal Membrane Occupation and Recognition Nexus (MORN)affects enzyme activity and distribution.	phosphatidylinositol-4-phosphate 5-kinase 1 (PIP5K1); CONTAINS InterPro DOMAIN/s: Phosphatidylinositol-4-phosphate 5-kinase, core, subgroup (InterPro:IPR016034), Phosphatidylinositol-4-phosphate 5-kinase, plant (InterPro:IPR017163), MORN motif (InterPro:IPR003409), Phosphatidylinositol-4-phosphate 5-kinase, core (InterPro:IPR002498); BEST Arabidopsis thaliana protein match is: phosphatidylinosito…
Potri.018G034100.v4.1		2.38444	3.1643	3.22257e-53	2.3763e-52	2.62224	3.44797	2.95365e-74	2.50132e-73	2.96038	3.72839	1.49853e-106	1.37231e-105	2.76781	3.56552	3.40987e-86	2.69144e-85	1.88613	2.87202	8.4331e-32	2.88542e-31	YES	YES	YES	YES	YES	2.04	1.84	6.34	11.18	11.85	8.1	17.09	7.51	14.88	13.14	8.3	7.44	AT5G11300.1	mitotic-like cyclin 3B from Arabidopsis	mitotic-like cyclin, core cell cycle gene that is expressed only in roots (RT_PCR), portions with mitotic activity only (whole mount in situ).	mitotic-like cyclin 3B from Arabidopsis (CYC3B); FUNCTIONS IN: cyclin-dependent protein kinase regulator activity; INVOLVED IN: regulation of cell cycle; LOCATED IN: nucleus, chloroplast; EXPRESSED IN: 18 plant structures; EXPRESSED DURING: 13 growth stages; CONTAINS InterPro DOMAIN/s: Cyclin, C-terminal (InterPro:IPR004367), Cyclin (InterPro:IPR006670), G2/mitotic-specific cyclin A (InterPro:IPR…
Potri.019G094000.v4.1		5.44444	4.85238	0	0	5.43112	4.93097	0	0	4.39114	3.91257	1.69375e-184	2.64304e-183	3.87758	3.4393	1.70221e-117	1.82154e-116	2.78549	2.49685	5.985e-43	2.51445e-42	YES	YES	YES	YES	YES	2	1.95	6.24	88.91	90.71	7.83	43.56	7.41	31.81	28.67	15.02	14.58	AT3G54420.1	homolog of carrot EP3-3 chitinase	encodes an EP3 chitinase that is expressed during somatic embryogenesis in 'nursing' cells surrounding the embryos but not in embryos themselves. The gene is also expressed in mature pollen and growing pollen tubes until they enter the receptive synergid, but not in endosperm and integuments as in carrot. Post-embryonically, expression is found in hydathodes, stipules, root epidermis and emerging…	homolog of carrot EP3-3 chitinase (EP3); FUNCTIONS IN: chitinase activity; INVOLVED IN: somatic embryogenesis, plant-type hypersensitive response; LOCATED IN: cell wall; EXPRESSED IN: 18 plant structures; EXPRESSED DURING: 6 growth stages; CONTAINS InterPro DOMAIN/s: Chitin-binding, type 1, conserved site (InterPro:IPR018371), Glycoside hydrolase, family 19 (InterPro:IPR016283), Chitin-binding, t…
Potri.011G121600.v4.1		1.73638	2.73256	1.42169e-24	5.58524e-24	1.54581	2.65718	2.86586e-19	8.65512e-19	1.7033	2.77292	3.52224e-25	1.06299e-24	1.72715	2.79045	1.23874e-25	3.88288e-25	1.88444	2.94818	2.36526e-33	8.36562e-33	YES	YES	YES	YES	YES	1.97	1.98	6.12	6.76	4.87	7.77	7.18	7.37	6.83	7.09	7.94	8.05	AT5G53760.2	Seven transmembrane MLO family protein	A member of a large family of seven-transmembrane domain proteins specific to plants, homologs of the barley mildew resistance locus o (MLO) protein. The Arabidopsis genome contains 15 genes encoding MLO proteins, with localization in plasma membrane. Phylogenetic analysis revealed four clades of closely-related AtMLO genes. ATMLO11 belongs to the clade I, with AtMLO4 and AtMLO14. The gene is exp…	MILDEW RESISTANCE LOCUS O 11 (MLO11); FUNCTIONS IN: calmodulin binding; INVOLVED IN: cell death, defense response; LOCATED IN: integral to membrane, plasma membrane; EXPRESSED IN: 25 plant structures; EXPRESSED DURING: 10 growth stages; CONTAINS InterPro DOMAIN/s: Mlo-related protein (InterPro:IPR004326); BEST Arabidopsis thaliana protein match is: Seven transmembrane MLO family protein (TAIR:AT1…
Potri.006G003900.v4.1		1.90275	1.67024	2.22199e-14	6.17207e-14	2.39988	2.14249	1.04888e-28	4.09894e-28	2.76276	2.43613	3.0734e-41	1.2941e-40	2.78071	2.4567	6.45794e-42	2.79963e-41	2.34359	2.12691	3.62739e-26	1.10034e-25	YES	YES	YES	YES	YES	1.94	1.47	6.11	7	9.06	7.74	13.63	7.37	13.27	11.47	8.97	10.03	AT5G47740.1	Adenine nucleotide alpha hydrolases-like superfamily protein		Adenine nucleotide alpha hydrolases-like superfamily protein; FUNCTIONS IN: molecular_function unknown; INVOLVED IN: response to stress; LOCATED IN: cellular_component unknown; EXPRESSED IN: root; CONTAINS InterPro DOMAIN/s: UspA (InterPro:IPR006016), Rossmann-like alpha/beta/alpha sandwich fold (InterPro:IPR014729); BEST Arabidopsis thaliana protein match is: U-box domain-containing protein kina…
Potri.014G038100.v4.1		2.50987	3.70836	2.40482e-81	2.64065e-80	2.53257	3.80946	6.60436e-91	6.76494e-90	1.82387	3.22633	2.20364e-37	8.64721e-37	2.36786	3.66464	4.66316e-74	3.23319e-73	2.42372	3.74794	8.29228e-84	5.86927e-83	YES	YES	YES	YES	YES	1.93	2.11	5.97	12.82	12.37	7.65	8.41	7.32	11.68	10.46	11.95	11.75	AT4G31940.1	cytochrome P450, family 82, subfamily C, polypeptide 4	member of CYP82C	cytochrome P450, family 82, subfamily C, polypeptide 4 (CYP82C4); FUNCTIONS IN: electron carrier activity, monooxygenase activity, iron ion binding, oxygen binding, heme binding; INVOLVED IN: oxidation reduction; LOCATED IN: endomembrane system; EXPRESSED IN: root; CONTAINS InterPro DOMAIN/s: Cytochrome P450 (InterPro:IPR001128), Cytochrome P450, E-class, group I (InterPro:IPR002401), Cytochrome …
Potri.005G115800.v4.1		-2.54187	1.16005	1.84256e-15	5.36269e-15	-2.19354	1.16214	3.2823e-14	8.2673e-14	-2.26294	1.21974	3.80202e-14	8.42347e-14	-1.24001	1.42213	1.24669e-06	2.0498e-06	-1.17401	1.46605	3.12458e-06	4.95256e-06	YES	YES	YES	YES	YES	1.84	1.78	5.94	0.36	0.5	7.52	0.3	7.2	0.65	1	0.76	0.99	AT2G13810.1	AGD2-like defense response protein 1		AGD2-like defense response protein 1 (ALD1); FUNCTIONS IN: transferase activity, transferring nitrogenous groups, pyridoxal phosphate binding, transaminase activity, catalytic activity; INVOLVED IN: asparagine catabolic process, biosynthetic process, glutamate catabolic process to oxaloacetate, aspartate transamidation; LOCATED IN: chloroplast; EXPRESSED IN: sepal, root, stamen; EXPRESSED DURING:…
Potri.013G148900.v4.1		4.29023	3.1764	7.44199e-109	1.10869e-107	3.54767	2.58915	7.52863e-63	5.45632e-62	3.91573	2.90769	9.21713e-85	6.87306e-84	3.40149	2.44287	3.07807e-53	1.60821e-52	3.8721	2.91386	1.27482e-83	8.99876e-83	YES	YES	YES	YES	YES	1.76	1.74	5.66	37.11	22.64	7.51	31.59	7.18	18.19	21.21	27.89	29.14	AT4G03280.1	photosynthetic electron transfer C	Encodes the Rieske FeS center of cytochrome b6f complex. Gene is expressed in shoot but not in root. Mutant has reduced electron transport at saturating light intensities and Q-cycle activity is hypersensitive to acidification of the thylakoid lumen.	photosynthetic electron transfer C (PETC); FUNCTIONS IN: electron transporter, transferring electrons from cytochrome b6/f complex of photosystem II activity; INVOLVED IN: response to karrikin, defense response to bacterium, photosynthetic electron transport in cytochrome b6/f, nonphotochemical quenching; LOCATED IN: in 7 components; EXPRESSED IN: 26 plant structures; EXPRESSED DURING: 14 growth …
Potri.018G115800.v4.1		-4.07161	0.288783	1.93919e-15	5.63669e-15	-6.03189	0.153402	7.78735e-20	2.39682e-19	-8.24499	0.228306	9.76577e-21	2.62473e-20	-8.26965	0.192217	3.83286e-21	1.07843e-20	-5.98624	0.224435	1.27329e-19	3.28179e-19	YES	YES	YES	YES	YES	1.75	1.82	5.63	0.11	0.05	7.5	0	7.14	0	0	0	0.05	AT1G19250.1	flavin-dependent monooxygenase 1	FMO1 is required for full expression of TIR-NB-LRRconditioned resistance to avirulent pathogens and for basal resistance to invasive virulent pathogens. Functions in an EDS1-regulated but SA-independent mechanism that promotes resistance and cell death at pathogen infection sites.	flavin-dependent monooxygenase 1 (FMO1); FUNCTIONS IN: NADP or NADPH binding, oxidoreductase activity, monooxygenase activity, FAD binding, flavin-containing monooxygenase activity; INVOLVED IN: in 7 processes; LOCATED IN: endomembrane system, intrinsic to endoplasmic reticulum membrane; EXPRESSED IN: stem, leaf whorl, sepal, root, stamen; EXPRESSED DURING: 4 anthesis; CONTAINS InterPro DOMAIN/s:…
Potri.001G292300.v4.1		1.03092	1.74331	6.57447e-06	1.18431e-05	1.57539	2.1767	2.18485e-15	5.74936e-15	2.05251	2.54015	3.90211e-29	1.28734e-28	1.3213	1.99393	1.96389e-10	3.8701e-10	1.55776	2.19796	9.20036e-15	2.05848e-14	YES	YES	YES	YES	YES	1.74	2.32	5.47	4.37	7.14	7.39	9.28	7.12	5.44	5.37	6.75	6.44	AT5G65420.1	CYCLIN D4;1	Encodes a D-type cyclin CYCD4;1 that physically interacts with CDC2A and is expressed during vascular tissue development, embryogenesis, and formation of lateral root primordia. Its expression is upregulated early during germination.Involved in stomatal cell lineage proliferation in the hypocotyl.	CYCLIN D4;1 (CYCD4;1); FUNCTIONS IN: cyclin-dependent protein kinase regulator activity; INVOLVED IN: G1 phase of mitotic cell cycle, regulation of cell cycle, response to sucrose stimulus, stomatal lineage progression; LOCATED IN: nucleus; EXPRESSED IN: 18 plant structures; EXPRESSED DURING: 13 growth stages; CONTAINS InterPro DOMAIN/s: Cyclin, C-terminal (InterPro:IPR004367), Cyclin D (InterPro…
Potri.001G066700.v4.1		1.02032	2.2943	5.24601e-08	1.07538e-07	1.11437	2.4075	3.78833e-10	8.05873e-10	1.50204	2.68489	2.13478e-19	5.53057e-19	1.40473	2.61289	2.29957e-16	5.62485e-16	1.32026	2.58874	1.12662e-14	2.51351e-14	YES	YES	YES	YES	YES	1.74	1.78	5.42	3.76	3.86	7.25	5.5	7.1	4.88	5.05	4.33	5.28	AT5G13290.2	Protein kinase superfamily protein	Encodes a protein with predicted Ser/Thr kinase activity and membrane localization that is involved in the CLV3 signaling pathway that represses WUS expression in the meristem. Loss of function of CRN can suppress the phenotype caused by overexpression of CLV3. SOL2 isolated as a suppressor of root- specific overexpression of CLE19, a clavata3 like gene. sol2 partially suppresses the short root p…	CORYNE (CRN); FUNCTIONS IN: protein kinase activity, kinase activity, ATP binding; INVOLVED IN: regulation of meristem growth, regulation of root meristem growth, meristem maintenance, regulation of flower development; LOCATED IN: plasma membrane; EXPRESSED IN: 25 plant structures; EXPRESSED DURING: 11 growth stages; CONTAINS InterPro DOMAIN/s: Protein kinase, catalytic domain (InterPro:IPR000719…
Potri.003G175700.v4.1		2.28876	3.7197	4.90844e-71	4.71521e-70	2.05264	3.60206	9.83213e-58	6.60512e-57	2.14311	3.6694	2.17782e-64	1.28307e-63	2.82358	4.2442	4.18043e-137	5.31938e-136	1.74722	3.39461	2.55884e-39	1.01106e-38	YES	YES	YES	YES	YES	1.73	1.38	5.41	7.6	6.88	7.06	7.87	7.05	11.64	11.76	5.44	5.95	AT3G24240.1	Leucine-rich repeat receptor-like protein kinase family protein		Leucine-rich repeat receptor-like protein kinase family protein; FUNCTIONS IN: protein serine/threonine kinase activity, protein kinase activity, ATP binding; INVOLVED IN: transmembrane receptor protein tyrosine kinase signaling pathway, protein amino acid phosphorylation; LOCATED IN: endomembrane system; EXPRESSED IN: root; CONTAINS InterPro DOMAIN/s: Protein kinase, ATP binding site (InterPro:I…
Potri.017G010600.v4.1		4.37913	4.31557	1.48543e-232	5.19993e-231	3.98144	4.03404	4.2982e-181	8.73591e-180	4.77787	4.7718	0	0	4.51249	4.52256	5.22942e-273	1.42556e-271	4.44171	4.49558	9.39856e-277	2.17016e-275	YES	YES	YES	YES	YES	1.72	1.98	5.21	38.97	32.61	6.98	56.78	7.02	43.58	46.69	45.83	43.13	AT3G26040.1	HXXXD-type acyl-transferase family protein		HXXXD-type acyl-transferase family protein; FUNCTIONS IN: transferase activity, transferring acyl groups other than amino-acyl groups, transferase activity; INVOLVED IN: biological_process unknown; LOCATED IN: cellular_component unknown; EXPRESSED IN: root; CONTAINS InterPro DOMAIN/s: Transferase (InterPro:IPR003480); BEST Arabidopsis thaliana protein match is: HXXXD-type acyl-transferase family …
Potri.009G169900.v4.1		6.28763	6.64192	0	0	6.5778	6.99076	0	0	6.12921	6.54956	0	0	7.09664	7.50325	0	0	7.03182	7.47538	0	0	YES	YES	YES	YES	YES	1.62	1.84	5.15	140.97	178.2	6.96	134.87	6.96	254.66	251.21	250.31	248.53	AT1G76490.1	hydroxy methylglutaryl CoA reductase 1	Encodes a 3-hydroxy-3-methylglutaryl coenzyme A reductase, which is involved in melavonate biosynthesis and performs the first committed step in isoprenoid biosynthesis. Expression is activated in dark in leaf tissue but not controlled by light in the root (confine	hydroxy methylglutaryl CoA reductase 1 (HMG1); CONTAINS InterPro DOMAIN/s: Hydroxymethylglutaryl-CoA reductase, class I, catalytic (InterPro:IPR004554), Hydroxymethylglutaryl-CoA reductase, class I/II, substrate-binding (InterPro:IPR009029), Hydroxymethylglutaryl-CoA reductase, class I/II, NAD/NADP-binding (InterPro:IPR009023), Hydroxymethylglutaryl-CoA reductase, class I/II, catalytic (InterPro:…
Potri.009G108600.v4.1		1.33139	1.85292	2.40482e-09	5.28949e-09	1.80548	2.26144	2.16348e-20	6.76307e-20	1.83886	2.28332	7.83504e-21	2.11187e-20	1.22653	1.83821	2.03521e-08	3.66169e-08	1.76	2.26107	1.54208e-18	3.86029e-18	YES	YES	YES	YES	YES	1.62	1.93	4.98	4.41	6.85	6.83	6.91	6.67	4.42	4.43	6.08	7.15	AT4G31940.1	cytochrome P450, family 82, subfamily C, polypeptide 4	member of CYP82C	cytochrome P450, family 82, subfamily C, polypeptide 4 (CYP82C4); FUNCTIONS IN: electron carrier activity, monooxygenase activity, iron ion binding, oxygen binding, heme binding; INVOLVED IN: oxidation reduction; LOCATED IN: endomembrane system; EXPRESSED IN: root; CONTAINS InterPro DOMAIN/s: Cytochrome P450 (InterPro:IPR001128), Cytochrome P450, E-class, group I (InterPro:IPR002401), Cytochrome …
Potri.017G055800.v4.1		2.62233	2.50477	9.5597e-40	5.48175e-39	2.72336	2.67744	5.86464e-48	3.36846e-47	3.03573	2.93451	4.70433e-65	2.80118e-64	3.40895	3.27209	1.56163e-91	1.30615e-90	2.78609	2.75933	1.56451e-51	7.49751e-51	YES	YES	YES	YES	YES	1.58	1.01	4.95	8.73	9.43	6.67	11.92	6.66	13.99	15.21	10.35	9.24	AT3G07130.1	purple acid phosphatase 15	Encodes PAP15, a purple acid phosphatase with phytase activity. Expression of PAP15 is developmentally and temporally regulated, with strong expression at the early stages of seedling growth and pollen germination. The expression is also organ/tissue-specific, with strongest expression in the vasculature, pollen grains, and roots. Recombinant PAP protein exhibits broad substrate specificity with …	purple acid phosphatase 15 (PAP15); FUNCTIONS IN: protein serine/threonine phosphatase activity, acid phosphatase activity; INVOLVED IN: pollen germination, seed germination; LOCATED IN: endomembrane system; EXPRESSED IN: 11 plant structures; EXPRESSED DURING: seedling growth, petal differentiation and expansion stage; CONTAINS InterPro DOMAIN/s: Purple acid phosphatase, N-terminal (InterPro:IPR0…
Potri.014G007200.v4.1	GRF	1.0454	1.91801	9.7506e-07	1.84958e-06	1.053	1.97148	3.28019e-07	5.98677e-07	2.03929	2.69731	6.10675e-32	2.13058e-31	2.29123	2.90192	1.47134e-42	6.44733e-42	1.59849	2.39532	1.45113e-17	3.53841e-17	YES	YES	YES	YES	YES	1.57	1.68	4.89	3.48	4.16	6.54	7.64	6.62	8.35	8.58	5.29	5.5	AT2G22840.1	growth-regulating factor 1	Growth regulating factor encoding transcription activator. One of the nine members of a GRF gene family, containing nuclear targeting domain. Mutants result in smaller leaves indicating the role of the gene in leaf development. Expressed in root, shoot and flower	growth-regulating factor 1 (GRF1); CONTAINS InterPro DOMAIN/s: Glutamine-Leucine-Glutamine, QLQ (InterPro:IPR014978), WRC (InterPro:IPR014977); BEST Arabidopsis thaliana protein match is: growth-regulating factor 2 (TAIR:AT4G37740.1); Has 714 Blast hits to 669 proteins in 68 species: Archae - 0; Bacteria - 24; Metazoa - 65; Fungi - 20; Plants - 548; Viruses - 4; Other Eukaryotes - 53 (source: NCB…
Potri.008G098850.v4.1		2.45359	3.86302	6.03232e-87	7.14165e-86	2.47442	3.95947	2.97551e-96	3.22462e-95	2.16328	3.69325	1.97485e-66	1.19941e-65	2.47265	3.95133	1.35769e-94	1.17264e-93	3.26392	4.68246	2.84262e-228	5.34977e-227	YES	YES	YES	YES	YES	1.48	1.22	4.78	7.92	8.36	6.44	6.49	6.59	7.89	8.11	14.11	14.3	AT3G53480.1	pleiotropic drug resistance 9	Negative regulator of auxin polar transport inhibitors. ABCG37 regulates auxin distribution and homeostasis in roots by excluding IBA from the root apex, but does not act directly in basipetal transport. ABCG37 and ABCG36 act redundantly at outermost root plasma membranes and, transport IBA out of the cells.	pleiotropic drug resistance 9 (PDR9); FUNCTIONS IN: ATPase activity, coupled to transmembrane movement of substances, transporter activity; INVOLVED IN: cellular response to indolebutyric acid stimulus, drug transmembrane transport, root development, auxin polar transport; LOCATED IN: plasma membrane; EXPRESSED IN: 7 plant structures; EXPRESSED DURING: 4 anthesis; CONTAINS InterPro DOMAIN/s: ATPa…
Potri.016G035300.v4.1		2.48807	3.30284	7.4714e-62	6.27746e-61	2.60107	3.4804	4.60735e-76	3.99522e-75	2.76745	3.61137	4.86258e-90	3.83615e-89	2.76885	3.61637	1.93097e-89	1.58082e-88	2.28943	3.24806	1.74414e-54	8.72849e-54	YES	YES	YES	YES	YES	1.47	1.71	4.62	9.17	10.45	6.32	12.06	6.42	11.51	11.69	8.76	8.37	AT1G73590.1	Auxin efflux carrier family protein	Encodes an auxin efflux carrier involved in shoot and root development. It is involved in the maintenance of embryonic auxin gradients. Loss of function severely affects organ initiation, pin1 mutants are characterised by an inflorescence meristem that does not initiate any flowers, resulting in the formation of a naked inflorescence stem. PIN1 is involved in the determination of leaf shape by ac…	PIN-FORMED 1 (PIN1); FUNCTIONS IN: transporter activity; INVOLVED IN: in 14 processes; LOCATED IN: apical part of cell, plasma membrane, membrane, basal plasma membrane, cytoplasm; EXPRESSED IN: 25 plant structures; EXPRESSED DURING: 13 growth stages; CONTAINS InterPro DOMAIN/s: Auxin efflux carrier, subgroup (InterPro:IPR014024), Auxin efflux carrier (InterPro:IPR004776); BEST Arabidopsis thalia…
Potri.001G070500.v4.1		3.07306	3.93944	1.09005e-124	1.88183e-123	3.35814	4.28378	4.06465e-177	8.11879e-176	3.6997	4.58139	5.3704e-243	1.10267e-241	3.17356	4.10672	1.89135e-146	2.57349e-145	2.96113	3.95783	5.60489e-127	5.78606e-126	YES	YES	YES	YES	YES	1.46	1.53	4.28	13.75	15.49	6.08	21.12	6.31	14.06	14.75	12.29	13.23	AT1G44900.1	minichromosome maintenance (MCM2/3/5) family protein	Encodes MCM2 (MINICHROMOSOME MAINTENANCE 2), a protein essential to embryo development. Overexpression results in altered root meristem function.	MINICHROMOSOME MAINTENANCE 2 (MCM2); FUNCTIONS IN: DNA-dependent ATPase activity, DNA binding, ATP binding; INVOLVED IN: in 7 processes; LOCATED IN: nuclear chromatin; EXPRESSED IN: 22 plant structures; EXPRESSED DURING: 12 growth stages; CONTAINS InterPro DOMAIN/s: Nucleic acid-binding, OB-fold-like (InterPro:IPR016027), Nucleic acid-binding, OB-fold (InterPro:IPR012340), DNA-dependent ATPase MC…
Potri.008G070000.v4.1		2.69702	2.70288	3.35959e-47	2.23635e-46	3.00965	3.06368	3.28469e-70	2.64441e-69	3.12341	3.14718	1.0729e-77	7.44762e-77	3.01935	3.06047	1.74383e-69	1.14472e-68	3.10704	3.17732	1.39447e-78	9.32267e-78	YES	YES	YES	YES	YES	1.36	1.9	4.27	11.62	13.18	6.05	15.28	6.17	13.74	14.57	15.81	15.29	AT3G55990.1	Plant protein of unknown function (DUF828)	Encodes ESK1 (Eskimo1). A member of a large gene family of DUF231 domain proteins whose members encode a total of 45 proteins of unknown function. ESK1 functions as a negative regulator of cold acclimation. Mutations in the ESK1 gene provides strong freezing tolerance. A member of the TBL (TRICHOME BIREFRINGENCE-LIKE) gene family containing a plant-specific DUF231 (domain of unknown function) dom…	ESKIMO 1 (ESK1); FUNCTIONS IN: molecular_function unknown; INVOLVED IN: response to freezing, positive regulation of transcription, response to cold; LOCATED IN: cellular_component unknown; EXPRESSED IN: stem, fruit, root, flower, leaf; CONTAINS InterPro DOMAIN/s: Protein of unknown function DUF231, plant (InterPro:IPR004253); BEST Arabidopsis thaliana protein match is: TRICHOME BIREFRINGENCE-LIK…
Potri.004G024566.v4.1		1.61257	2.21015	8.06619e-16	2.38056e-15	1.46324	2.16395	2.38799e-13	5.82601e-13	1.68654	2.32798	1.14021e-18	2.89216e-18	1.64774	2.29878	1.01608e-17	2.59226e-17	1.46569	2.20196	2.18761e-13	4.66413e-13	YES	YES	YES	YES	YES	1.32	1.81	4.1	4.5	3.81	5.92	5.67	6.16	5.31	5.12	4.03	5.43	AT4G05200.1	cysteine-rich RLK (RECEPTOR-like protein kinase) 25	Encodes a cysteine-rich receptor-like protein kinase.	cysteine-rich RLK (RECEPTOR-like protein kinase) 25 (CRK25); FUNCTIONS IN: kinase activity; INVOLVED IN: protein amino acid phosphorylation; LOCATED IN: endomembrane system; EXPRESSED IN: root; CONTAINS InterPro DOMAIN/s: Protein kinase, ATP binding site (InterPro:IPR017441), Protein kinase, catalytic domain (InterPro:IPR000719), Protein of unknown function DUF26 (InterPro:IPR002902), Serine-thre…
Potri.014G018200.v4.1		-1.41349	1.02904	3.61491e-06	6.62102e-06	-3.18652	0.686619	2.95713e-17	8.32321e-17	-2.56633	0.835939	4.0707e-13	8.72314e-13	-2.38433	0.833272	9.43679e-13	2.03334e-12	-2.03811	0.913018	1.43327e-10	2.74755e-10	YES	YES	YES	YES	YES	1.32	1.47	4.07	0.56	0.11	5.66	0.28	6.04	0.33	0.25	0.26	0.46	AT3G22400.1	PLAT/LH2 domain-containing lipoxygenase family protein		LOX5; FUNCTIONS IN: oxidoreductase activity, acting on single donors with incorporation of molecular oxygen, incorporation of two atoms of oxygen, lipoxygenase activity, iron ion binding, metal ion binding; INVOLVED IN: root development; LOCATED IN: chloroplast; EXPRESSED IN: 22 plant structures; EXPRESSED DURING: 13 growth stages; CONTAINS InterPro DOMAIN/s: Lipoxygenase, LH2 (InterPro:IPR001024…
Potri.004G185700.v4.1		1.78782	3.72126	3.22857e-48	2.18434e-47	1.9717	3.93452	3.03682e-67	2.35092e-66	2.44981	4.32069	3.23142e-121	3.32767e-120	2.27514	4.17559	1.15515e-96	1.02129e-95	1.73127	3.77906	1.86677e-50	8.81662e-50	YES	YES	YES	YES	YES	1.28	1.12	4.06	4.61	4.89	5.64	7.37	5.83	5.74	6.7	4.38	4.34	AT1G08260.1	DNA polymerase epsilon catalytic subunit	Similar to POL2A, DNA polymerase epsilon catalytic subunit. Essential for Arabidopsis growth. Null homozygotes are embryo lethal, partial loss of function alleles show embryo patterning defects such as root pole displacement. Delayed progression through cell cycle results in embryos with smaller numbers of larger cells.	TILTED 1 (TIL1); FUNCTIONS IN: DNA-directed DNA polymerase activity, DNA binding, nucleotide binding, zinc ion binding, nucleic acid binding; INVOLVED IN: positive regulation of S phase of mitotic cell cycle, negative regulation of long-day photoperiodism, flowering, embryo development ending in seed dormancy; LOCATED IN: apoplast, epsilon DNA polymerase complex; EXPRESSED IN: 19 plant structures…
Potri.017G098700.v4.1		2.74827	3.11172	4.59843e-63	3.94084e-62	2.09527	2.65094	7.60571e-33	3.2792e-32	2.29709	2.80762	4.14057e-41	1.74094e-40	2.64254	3.09947	3.46278e-59	1.97002e-58	2.49291	3.01051	1.99729e-52	9.70406e-52	YES	YES	YES	YES	YES	1.27	1.44	4.04	9.74	6.05	5.62	8.14	5.74	9.45	8.58	7.97	8.78	AT5G60920.1	COBRA-like extracellular glycosyl-phosphatidyl inositol-anchored protein family	Encodes a glycosylphosphatidylinositol-anchored protein localized primarily in the plasma membrane of the longitudinal sides of root cells. Necessary for oriented cell expansion in Arabidopsis. Cob mutants have abnormal roots that expand radially rather than longitudinally under certain growth conditions.	COBRA (COB); FUNCTIONS IN: molecular_function unknown; INVOLVED IN: response to salt stress, multidimensional cell growth, cellulose microfibril organization; LOCATED IN: in 6 components; EXPRESSED IN: 23 plant structures; EXPRESSED DURING: 13 growth stages; CONTAINS InterPro DOMAIN/s: Glycosyl-phosphatidyl inositol-anchored, plant (InterPro:IPR006918), COBRA-like (InterPro:IPR017391); BEST Arabi…
Potri.009G118800.v4.1		2.32345	2.77481	1.15591e-39	6.60823e-39	3.55709	3.93862	8.07737e-152	1.37917e-150	3.65366	4.01043	3.97589e-165	5.5428e-164	2.98277	3.4108	9.56834e-86	7.51963e-85	4.11788	4.48816	3.80426e-257	8.15903e-256	YES	YES	YES	YES	YES	1.25	1.2	3.94	6.42	15.19	5.56	17.55	5.69	10.35	10.34	22.92	23.84	AT4G39210.1	Glucose-1-phosphate adenylyltransferase family protein	Encodes the large subunit of ADP-Glucose Pyrophosphorylase which catalyzes the first, rate limiting step in starch biosynthesis. The large subunit plays a regulatory role whereas the small subunit (ApS) is the catalytic isoform. Four isoforms (ApL1-4) have been identified. ApL3 is the major large subunit isoform present in inflorescences, fruits and roots.	APL3; CONTAINS InterPro DOMAIN/s: Glucose-1-phosphate adenylyltransferase (InterPro:IPR011831), ADP-glucose pyrophosphorylase, conserved site (InterPro:IPR005836), Nucleotidyl transferase (InterPro:IPR005835); BEST Arabidopsis thaliana protein match is: Glucose-1-phosphate adenylyltransferase family protein (TAIR:AT2G21590.2); Has 8453 Blast hits to 8443 proteins in 1715 species: Archae - 406; Ba…
Potri.007G122100.v4.1		2.08581	1.38521	3.88217e-14	1.0674e-13	3.8114	2.95391	5.37323e-86	5.231e-85	4.40648	3.4894	7.43466e-139	8.57256e-138	5.20241	4.25979	2.35525e-256	5.92031e-255	5.90962	4.9877	0	0	YES	YES	YES	YES	YES	1.23	1.15	3.91	4.8	17.83	5.54	28.76	5.63	49.51	43.33	76.69	80.89	AT1G05260.1	Peroxidase superfamily protein	Encodes a cold-inducible cationic peroxidase that is involved in the stress response. In response to low temperature, RCI3 transcripts accumulate in the aerial part and in roots of etiolated seedlings but only in roots of light-grown seedlings.	RARE COLD INDUCIBLE GENE 3 (RCI3); FUNCTIONS IN: peroxidase activity; INVOLVED IN: response to desiccation, response to cold, hyperosmotic salinity response; LOCATED IN: endoplasmic reticulum; EXPRESSED IN: 12 plant structures; EXPRESSED DURING: 4 anthesis, petal differentiation and expansion stage, E expanded cotyledon stage; CONTAINS InterPro DOMAIN/s: Haem peroxidase (InterPro:IPR010255), Plan…
Potri.008G022700.v4.1		1.03887	0.502397	0.0037165	0.00536369	3.15712	2.19651	7.25837e-42	3.75143e-41	1.17732	0.643458	0.000509558	0.000714548	3.90913	2.86439	4.02915e-81	3.03384e-80	3.66001	2.67471	3.59735e-67	2.11451e-66	YES	YES	YES	YES	YES	1.22	1.01	3.88	1.71	9.84	5.5	2.94	5.61	17.98	17.96	16.04	15.35	AT1G14540.1	Peroxidase superfamily protein		Peroxidase superfamily protein; FUNCTIONS IN: peroxidase activity, heme binding; INVOLVED IN: response to oxidative stress, oxidation reduction; LOCATED IN: endomembrane system; EXPRESSED IN: leaf apex, sepal, root, stamen; EXPRESSED DURING: 4 anthesis; CONTAINS InterPro DOMAIN/s: Haem peroxidase (InterPro:IPR010255), Plant peroxidase (InterPro:IPR000823), Peroxidases heam-ligand binding site (In…
Potri.009G064800.v4.1		2.47084	2.25406	2.69156e-31	1.27262e-30	3.44571	3.19258	3.80199e-89	3.81021e-88	2.9499	2.73427	8.93073e-55	4.66715e-54	2.91083	2.70549	5.80354e-52	2.97154e-51	2.26891	2.20211	2.84117e-26	8.64077e-26	YES	YES	YES	YES	YES	1.21	0.72	3.84	5.96	11.68	5.44	8.39	5.58	7.79	7.57	4.92	5.22	AT1G12740.1	cytochrome P450, family 87, subfamily A, polypeptide 2	encodes a protein with cytochrome P450 domain	cytochrome P450, family 87, subfamily A, polypeptide 2 (CYP87A2); FUNCTIONS IN: electron carrier activity, monooxygenase activity, iron ion binding, oxygen binding, heme binding; INVOLVED IN: oxidation reduction; EXPRESSED IN: root; CONTAINS InterPro DOMAIN/s: Cytochrome P450 (InterPro:IPR001128), Cytochrome P450, conserved site (InterPro:IPR017972), Cytochrome P450, E-class, group I (InterPro:IP…
Potri.005G111400.v4.1		3.22305	3.26844	3.33363e-85	3.86609e-84	2.0141	2.33026	1.35077e-24	4.75065e-24	1.5461	1.97064	6.86759e-13	1.45884e-12	2.73758	2.92254	2.59341e-55	1.39649e-54	1.44833	1.93336	3.3292e-11	6.54317e-11	YES	YES	YES	YES	YES	1.21	0.9	3.75	10.09	4.05	5.25	3.51	5.55	7.62	7.35	3.11	3.2	AT1G11000.1	Seven transmembrane MLO family protein	A member of a large family of seven-transmembrane domain proteins specific to plants, homologs of the barley mildew resistance locus o (MLO) protein. The Arabidopsis genome contains 15 genes encoding MLO proteins, with localization in plasma membrane. Phylogenetic analysis revealed four clades of closely-related AtMLO genes. ATMLO4 belongs to the clade I, with AtMLO11 and AtMLO14. The gene is exp…	MILDEW RESISTANCE LOCUS O 4 (MLO4); FUNCTIONS IN: calmodulin binding; INVOLVED IN: cell death, defense response; LOCATED IN: integral to membrane, plasma membrane; EXPRESSED IN: 18 plant structures; EXPRESSED DURING: 7 growth stages; CONTAINS InterPro DOMAIN/s: Mlo-related protein (InterPro:IPR004326); BEST Arabidopsis thaliana protein match is: Seven transmembrane MLO family protein (TAIR:AT5G53…
Potri.007G011600.v4.1	AP2	2.26006	2.68985	4.18066e-36	2.21193e-35	2.70825	3.14687	4.39967e-65	3.30546e-64	3.1303	3.50191	5.70169e-98	4.83373e-97	3.18112	3.55134	3.10185e-102	2.88767e-101	3.47091	3.8557	9.06896e-143	1.05689e-141	YES	YES	YES	YES	YES	1.2	1.46	3.71	6.4	9.07	5.15	12.97	5.47	12.25	13.6	14.35	18.05	AT5G10510.2	AINTEGUMENTA-like 6	Encodes an AP2-domain transcription factor involved in root stem cell identity and root development.	AINTEGUMENTA-like 6 (AIL6); CONTAINS InterPro DOMAIN/s: DNA-binding, integrase-type (InterPro:IPR016177), Pathogenesis-related transcriptional factor/ERF, DNA-binding (InterPro:IPR001471); BEST Arabidopsis thaliana protein match is: AINTEGUMENTA-like 7 (TAIR:AT5G65510.1); Has 30201 Blast hits to 17322 proteins in 780 species: Archae - 12; Bacteria - 1396; Metazoa - 17338; Fungi - 3422; Plants - 5…
Potri.001G147700.v4.1		1.43979	2.08401	2.24631e-12	5.71423e-12	3.2673	3.65819	1.37325e-114	1.75694e-113	3.44087	3.79834	3.85931e-134	4.30987e-133	3.68137	4.02374	5.84444e-165	8.93277e-164	3.28939	3.70704	2.31227e-121	2.28563e-120	YES	YES	YES	YES	YES	1.17	1.1	3.7	3.76	11.72	5.15	13.43	5.45	15.07	16.06	11.73	12.63	AT1G14390.1	Leucine-rich repeat protein kinase family protein		Leucine-rich repeat protein kinase family protein; FUNCTIONS IN: protein serine/threonine kinase activity, protein kinase activity, ATP binding; INVOLVED IN: transmembrane receptor protein tyrosine kinase signaling pathway, protein amino acid phosphorylation; LOCATED IN: endomembrane system; EXPRESSED IN: inflorescence meristem, root, flower; EXPRESSED DURING: petal differentiation and expansion …
Potri.001G334700.v4.1		1.82675	1.69526	1.04053e-13	2.81192e-13	2.98915	2.72937	3.81413e-55	2.46029e-54	3.30007	2.98889	1.71781e-74	1.14784e-73	3.21551	2.91988	3.44296e-68	2.22413e-67	3.00505	2.77093	1.08287e-57	5.67028e-57	YES	YES	YES	YES	YES	1.15	0.93	3.68	4.17	10.01	5.11	11.01	5.43	10.31	10.21	9.79	8.55	AT4G31940.1	cytochrome P450, family 82, subfamily C, polypeptide 4	member of CYP82C	cytochrome P450, family 82, subfamily C, polypeptide 4 (CYP82C4); FUNCTIONS IN: electron carrier activity, monooxygenase activity, iron ion binding, oxygen binding, heme binding; INVOLVED IN: oxidation reduction; LOCATED IN: endomembrane system; EXPRESSED IN: root; CONTAINS InterPro DOMAIN/s: Cytochrome P450 (InterPro:IPR001128), Cytochrome P450, E-class, group I (InterPro:IPR002401), Cytochrome …
Potri.001G011000.v4.1		3.10835	2.37473	8.03124e-46	5.21171e-45	4.57851	3.82269	1.93625e-177	3.87418e-176	5.53141	4.72159	0	0	5.08141	4.2905	9.03826e-258	2.29148e-256	3.97506	3.28212	1.72494e-110	1.57035e-109	YES	YES	YES	YES	YES	1.13	1.59	3.68	11.15	35.91	5.01	69.38	4.96	47.07	50.59	21.84	25.07	AT3G49120.1	peroxidase CB	Class III peroxidase Perx34. Expressed in roots, leaves and stems. Located in the cell wall. Involved in cell elongation. Expression activated by light. May play a role in generating H2O2 during defense response.	peroxidase CB (PRXCB); FUNCTIONS IN: peroxidase activity; INVOLVED IN: oxygen and reactive oxygen species metabolic process, response to light stimulus, defense response to bacterium, defense response to fungus, unidimensional cell growth; LOCATED IN: apoplast, cell wall, plasma membrane, vacuole, plant-type cell wall; EXPRESSED IN: stem, root, guard cell, cultured cell, leaf; EXPRESSED DURING: s…
Potri.004G145800.v4.1		2.67829	4.98546	3.35661e-207	1.01543e-205	2.81527	5.1774	1.26658e-257	3.81127e-256	3.1	5.42287	0	0	3.1143	5.4365	0	0	2.53086	4.96508	2.36112e-195	3.72486e-194	YES	YES	YES	YES	YES	1.13	1.34	3.67	8.06	9.57	4.96	11.56	4.94	11.18	11.74	7.76	7.89	AT3G19050.1	phragmoplast orienting kinesin 2	PHRAGMOPLAST ORIENTING KINESIN 2 is one of the two Arabidopsis homologs isolated in yeast two-hybrid screen for interaction partners of maize gene TANGLED1 (TAN1). Based on sequence homology in their motor domains, POK1 and POK2 belong to the kinesin-12 class which also includes the well-characterized group of phragmoplast-associated kinesins AtPAKRPs. Both kinesins are composed of an N-terminal …	phragmoplast orienting kinesin 2 (POK2); FUNCTIONS IN: microtubule motor activity, ATP binding; INVOLVED IN: cytokinesis; EXPRESSED IN: root vascular system, primary root tip, lateral root primordium; CONTAINS InterPro DOMAIN/s: Kinesin, motor region, conserved site (InterPro:IPR019821), Kinesin, motor domain (InterPro:IPR001752); BEST Arabidopsis thaliana protein match is: phragmoplast orienting…
Potri.004G172800.v4.1		2.86287	3.0496	4.13172e-64	3.58825e-63	3.2402	3.47152	5.91151e-100	6.6265e-99	3.21196	3.43068	1.33501e-96	1.11842e-95	3.12178	3.35729	8.2707e-88	6.65527e-87	3.18378	3.45084	2.37741e-97	1.93435e-96	YES	YES	YES	YES	YES	1.09	1.53	3.66	9.65	13.99	4.72	14.09	4.94	13.51	10.76	12.2	13.98	AT2G21050.1	like AUXIN RESISTANT 2	Encodes LAX2 (LIKE AUXIN RESISTANT), a member of the AUX1 LAX family of auxin influx carriers. Required for the establishment of embryonic root cell organization.	like AUXIN RESISTANT 2 (LAX2); CONTAINS InterPro DOMAIN/s: Amino acid transporter, transmembrane (InterPro:IPR013057); BEST Arabidopsis thaliana protein match is: like AUX1 3 (TAIR:AT1G77690.1); Has 1017 Blast hits to 1012 proteins in 134 species: Archae - 0; Bacteria - 2; Metazoa - 94; Fungi - 224; Plants - 668; Viruses - 0; Other Eukaryotes - 29 (source: NCBI BLink).
Potri.008G022264.v4.1		2.68706	0.761129	1.42271e-13	3.82062e-13	4.49622	2.45484	3.30004e-70	2.65585e-69	2.40589	0.604346	1.42323e-10	2.7699e-10	5.35723	3.26277	1.27725e-134	1.58498e-133	4.96096	2.92163	1.17124e-102	9.96059e-102	YES	YES	YES	YES	YES	1.08	0.82	3.66	5.51	24.84	4.71	5.55	4.89	45.33	39.55	33.46	34.49	AT1G14540.1	Peroxidase superfamily protein		Peroxidase superfamily protein; FUNCTIONS IN: peroxidase activity, heme binding; INVOLVED IN: response to oxidative stress, oxidation reduction; LOCATED IN: endomembrane system; EXPRESSED IN: leaf apex, sepal, root, stamen; EXPRESSED DURING: 4 anthesis; CONTAINS InterPro DOMAIN/s: Haem peroxidase (InterPro:IPR010255), Plant peroxidase (InterPro:IPR000823), Peroxidases heam-ligand binding site (In…
Potri.008G022232.v4.1		1.76792	0.852795	5.13871e-08	1.05395e-07	3.84666	2.68258	9.24492e-72	7.59053e-71	1.80791	0.944755	9.41829e-09	1.70012e-08	4.51898	3.29741	7.66896e-123	8.63831e-122	3.89577	2.75305	2.059e-75	1.32818e-74	YES	YES	YES	YES	YES	1.08	0.97	3.53	3.68	14.59	4.68	3.52	4.85	25.86	24.59	17.2	16.89	AT1G14550.1	Peroxidase superfamily protein		Peroxidase superfamily protein; FUNCTIONS IN: peroxidase activity, heme binding; INVOLVED IN: oxidation reduction, response to oxidative stress; LOCATED IN: endomembrane system; EXPRESSED IN: root; CONTAINS InterPro DOMAIN/s: Haem peroxidase (InterPro:IPR010255), Plant peroxidase (InterPro:IPR000823), Peroxidases heam-ligand binding site (InterPro:IPR019793), Haem peroxidase, plant/fungal/bacteri…
Potri.006G080500.v4.1		2.36571	1.04963	1.41996e-13	3.81415e-13	2.40017	1.15197	6.03856e-15	1.5659e-14	2.91467	1.57081	2.31877e-24	6.84432e-24	2.96086	1.613	4.0605e-26	1.28683e-25	2.35486	1.14546	3.068e-14	6.73544e-14	YES	YES	YES	YES	YES	1.05	0.98	3.52	4.78	6.64	4.66	9.37	4.82	8.19	8.72	6.3	5.29	AT2G45490.1	ataurora3	Encodes a member of a family of Ser/Thr kinases whose activities peak during cell division. Transcripts are abundant in tissues rich in dividing cells like roots and flowers but are low or absent in fully expanded leaves and stems. In interphase cells, the protein is predominantly nuclear. During mitosis, the protein associates with plant-specific cytoskeletal structures (preprophase band, phragm…	ataurora3 (AUR3); CONTAINS InterPro DOMAIN/s: Spindle assembly checkpoint kinase (InterPro:IPR020663), Protein kinase, ATP binding site (InterPro:IPR017441), Protein kinase, catalytic domain (InterPro:IPR000719), Serine/threonine-protein kinase domain (InterPro:IPR002290), Calcium/calmodulin-dependent protein kinase-like (InterPro:IPR020636), Serine/threonine-protein kinase-like domain (InterPro:…
Potri.019G129900.v4.1		2.27396	2.19781	2.12628e-26	8.77988e-26	2.73347	2.66268	1.68738e-47	9.61076e-47	3.13891	3.00148	8.9282e-71	5.73026e-70	3.17604	3.0394	2.34658e-72	1.59369e-71	2.77995	2.73246	2.5672e-50	1.21004e-49	YES	YES	YES	YES	YES	1.04	0.51	3.5	3.69	5.57	4.47	7.58	4.8	7.2	7.69	5.52	6.1	AT5G66750.1	chromatin remodeling 1	Protein is similar to SWI2/SNF2 chromatin remodeling proteins. DDM1 is appears to act as a chromatin-remodeling ATPase involved in cytosine methylation in CG and non-CG contexts. Involved in gene silencing and maintenance of DNA methylation and histone methylation. Hypomethylation of many genomic regions occurs in ddm1 mutants, and can cause several phenotypic abnormalities, but some loci, such a…	chromatin remodeling 1 (CHR1); FUNCTIONS IN: helicase activity, ATPase activity; INVOLVED IN: methylation-dependent chromatin silencing, DNA mediated transformation, transposition, RNA-mediated; LOCATED IN: nucleosome; EXPRESSED IN: 21 plant structures; EXPRESSED DURING: 14 growth stages; CONTAINS InterPro DOMAIN/s: DEAD-like helicase, N-terminal (InterPro:IPR014001), DNA/RNA helicase, C-terminal…
Potri.001G470100.v4.1		1.0747	1.20509	0.000119475	0.000196478	2.39854	2.2494	2.15724e-30	8.76593e-30	2.67283	2.46919	8.21868e-41	3.43281e-40	2.90406	2.67195	3.62325e-51	1.8309e-50	2.21686	2.13153	3.29328e-24	9.53583e-24	YES	YES	YES	YES	YES	1.03	1.17	3.44	1.91	7.03	4.35	8.24	4.68	8.91	8.71	5.66	5.65	AT1G30700.1	FAD-binding Berberine family protein		FAD-binding Berberine family protein; FUNCTIONS IN: electron carrier activity, oxidoreductase activity, FAD binding, catalytic activity; LOCATED IN: endomembrane system; EXPRESSED IN: stem, hypocotyl, root, stamen; EXPRESSED DURING: 4 anthesis; CONTAINS InterPro DOMAIN/s: FAD-binding, type 2 (InterPro:IPR016166), Berberine/berberine-like (InterPro:IPR012951), FAD linked oxidase, N-terminal (Inter…
Potri.002G150300.v4.1		-1.02997	-0.000311124	0.0144542	0.0196475	-7.52436	-0.555827	5.13443e-13	1.23754e-12	-1.3458	-0.0555038	0.0016266	0.00220424	-3.79848	-0.41882	1.50654e-09	2.853e-09	-5.20087	-0.457153	1.00738e-11	2.01751e-11	YES	YES	YES	YES	YES	1.03	1.17	3.35	0.71	0	4.34	0.69	4.47	0	0.17	0	0.05	AT2G45550.1	cytochrome P450, family 76, subfamily C, polypeptide 4	member of CYP76C	cytochrome P450, family 76, subfamily C, polypeptide 4 (CYP76C4); FUNCTIONS IN: electron carrier activity, monooxygenase activity, iron ion binding, oxygen binding, heme binding; INVOLVED IN: oxidation reduction; EXPRESSED IN: stem, root, carpel; EXPRESSED DURING: 4 anthesis; CONTAINS InterPro DOMAIN/s: Cytochrome P450 (InterPro:IPR001128), Cytochrome P450, E-class, group I (InterPro:IPR002401), …
Potri.019G095932.v4.1		1.82294	1.61205	6.15135e-13	1.60451e-12	3.14518	2.78457	2.33733e-62	1.68082e-61	2.14055	1.92353	1.82982e-20	4.87377e-20	1.84246	1.68847	2.5152e-14	5.73868e-14	1.76724	1.67224	6.14778e-13	1.29015e-12	YES	YES	YES	YES	YES	1.02	1	3.23	3.49	9.19	4.23	5.51	4.34	3.11	4.66	3.4	4.13	AT4G11170.1	Disease resistance protein (TIR-NBS-LRR class) family		Disease resistance protein (TIR-NBS-LRR class) family; FUNCTIONS IN: transmembrane receptor activity, nucleoside-triphosphatase activity, nucleotide binding, ATP binding; INVOLVED IN: defense response, response to ozone; LOCATED IN: mitochondrion; EXPRESSED IN: stem, root, stamen; EXPRESSED DURING: 4 anthesis; CONTAINS InterPro DOMAIN/s: ATPase, AAA+ type, core (InterPro:IPR003593), NB-ARC (Inter…
Potri.013G124900.v4.1		3.79302	2.6273	2.7449e-67	2.5085e-66	2.72804	1.7807	5.88709e-26	2.14404e-25	3.36578	2.32005	1.25003e-48	5.94948e-48	2.72313	1.76505	3.95702e-26	1.25437e-25	3.37829	2.37605	3.00244e-49	1.39229e-48	YES	YES	YES	YES	YES	0.99	0.67	3.15	12.31	4.82	3.89	10.09	4.32	5.57	6.07	9.4	9.56	AT1G73280.1	serine carboxypeptidase-like 3		serine carboxypeptidase-like 3 (scpl3); FUNCTIONS IN: serine-type carboxypeptidase activity; INVOLVED IN: proteolysis; LOCATED IN: endomembrane system; EXPRESSED IN: root; CONTAINS InterPro DOMAIN/s: Peptidase S10, serine carboxypeptidase (InterPro:IPR001563); BEST Arabidopsis thaliana protein match is: serine carboxypeptidase-like 2 (TAIR:AT1G73300.1); Has 3958 Blast hits to 3843 proteins in 445…
Potri.017G142700.v4.1		4.41746	3.769	1.41829e-165	3.2746e-164	4.44718	3.8973	5.54852e-182	1.13268e-180	4.3675	3.80113	1.97379e-170	2.82226e-169	4.62333	4.05003	9.82611e-207	1.91268e-205	5.63095	5.0647	0	0	YES	YES	YES	YES	YES	0.97	0.7	3.08	19.94	18.98	3.87	19.28	4.15	20.73	22.93	44.77	45.57	AT1G01580.1	ferric reduction oxidase 2	Encodes the low-iron-inducible ferric chelate reductase responsible for reduction of iron at the root surface. It is likely to be the major Fe(III) chelate reductase in Arabidopsis iron metabolism. Coordinately regulated with IRT1, the major transporter responsible for high-affinity iron uptake from the soil, at both transcriptional and posttranscriptional levels. Steady state mRNA levels are reg…	ferric reduction oxidase 2 (FRO2); CONTAINS InterPro DOMAIN/s: Ferredoxin reductase-type FAD-binding domain (InterPro:IPR017927), Ferric reductase, NAD binding (InterPro:IPR013121), FAD-binding 8 (InterPro:IPR013112), Riboflavin synthase-like beta-barrel (InterPro:IPR017938), Ferric reductase-like transmembrane component, N-terminal (InterPro:IPR013130); BEST Arabidopsis thaliana protein match is…
Potri.009G104900.v4.1		2.33676	0.637911	9.98513e-11	2.35348e-10	3.5827	1.77524	5.54526e-36	2.55181e-35	5.11539	3.18536	1.9789e-126	2.10546e-125	4.25934	2.38347	8.9645e-64	5.42779e-63	3.41995	1.65955	8.32133e-31	2.79111e-30	YES	YES	YES	YES	YES	0.96	0.57	3.04	4.36	10.84	3.73	29.35	4.03	16.06	15.05	8.23	9.86	AT1G47480.1	alpha/beta-Hydrolases superfamily protein		alpha/beta-Hydrolases superfamily protein; FUNCTIONS IN: hydrolase activity; INVOLVED IN: metabolic process; LOCATED IN: cellular_component unknown; EXPRESSED IN: stem, hypocotyl, root, flower; EXPRESSED DURING: petal differentiation and expansion stage; CONTAINS InterPro DOMAIN/s: Lipase, GDXG, active site (InterPro:IPR002168), Alpha/beta hydrolase fold-3 (InterPro:IPR013094); BEST Arabidopsis t…
Potri.009G156600.v4.1		-2.3454	-0.104337	1.59533e-06	2.99145e-06	-4.58694	-0.349361	3.9928e-12	9.26058e-12	-3.93564	-0.233272	6.45692e-11	1.2723e-10	-3.04057	-0.200249	7.53532e-09	1.38396e-08	-7.68126	-0.32707	1.28331e-14	2.85739e-14	YES	YES	YES	YES	YES	0.92	1.1	2.99	0.23	0	3.64	0.09	3.75	0.16	0.08	0	0	AT2G29130.1	laccase 2	putative laccase, knockout mutant had reduced root elongation under PEG-induced dehydration	laccase 2 (LAC2); FUNCTIONS IN: laccase activity; INVOLVED IN: response to water deprivation; LOCATED IN: endomembrane system, apoplast; EXPRESSED IN: 6 plant structures; EXPRESSED DURING: petal differentiation and expansion stage; CONTAINS InterPro DOMAIN/s: Multicopper oxidase, type 3 (InterPro:IPR011707), Laccase (InterPro:IPR017761), Multicopper oxidase, type 2 (InterPro:IPR011706), Cupredoxi…
Potri.019G131600.v4.1		3.76094	3.55809	5.46474e-123	9.2721e-122	3.81531	3.70457	1.47666e-139	2.28705e-138	3.07178	3.0116	4.93718e-70	3.14291e-69	3.18637	3.12	7.39755e-77	5.3299e-76	4.37867	4.26106	3.36872e-234	6.50658e-233	YES	YES	YES	YES	YES	0.91	0.88	2.9	13.2	13.75	3.4	7.86	3.68	8.84	8.59	20.03	21	AT2G30520.1	Phototropic-responsive NPH3 family protein	light inducible root phototropism 2 encoding a signal transducer of the phototropic response in Arabidopsis	ROOT PHOTOTROPISM 2 (RPT2); FUNCTIONS IN: signal transducer activity; INVOLVED IN: phototropism; LOCATED IN: nucleus; EXPRESSED IN: 22 plant structures; EXPRESSED DURING: 13 growth stages; CONTAINS InterPro DOMAIN/s: NPH3 (InterPro:IPR004249), BTB/POZ (InterPro:IPR013069), BTB/POZ fold (InterPro:IPR011333), BTB/POZ-like (InterPro:IPR000210); BEST Arabidopsis thaliana protein match is: Phototropic…
Potri.005G157800.v4.1		1.14877	1.17022	4.01384e-05	6.83125e-05	1.12266	1.20236	2.69424e-05	4.36695e-05	1.75427	1.65613	1.32881e-12	2.7928e-12	1.34721	1.36141	2.6609e-07	4.5303e-07	1.42865	1.4511	3.23233e-08	5.63225e-08	YES	YES	YES	YES	YES	0.87	0.82	2.85	1.98	2.18	3.21	3.82	3.68	2.61	1.93	2.41	2.57	AT5G65420.1	CYCLIN D4;1	Encodes a D-type cyclin CYCD4;1 that physically interacts with CDC2A and is expressed during vascular tissue development, embryogenesis, and formation of lateral root primordia. Its expression is upregulated early during germination.Involved in stomatal cell lineage proliferation in the hypocotyl.	CYCLIN D4;1 (CYCD4;1); FUNCTIONS IN: cyclin-dependent protein kinase regulator activity; INVOLVED IN: G1 phase of mitotic cell cycle, regulation of cell cycle, response to sucrose stimulus, stomatal lineage progression; LOCATED IN: nucleus; EXPRESSED IN: 18 plant structures; EXPRESSED DURING: 13 growth stages; CONTAINS InterPro DOMAIN/s: Cyclin, C-terminal (InterPro:IPR004367), Cyclin D (InterPro…
Potri.004G023550.v4.1		1.41968	1.26531	1.91582e-07	3.79705e-07	2.5873	2.24131	1.69897e-33	7.44706e-33	1.23784	1.20262	7.97612e-06	1.24856e-05	2.40448	2.07995	2.99128e-27	9.73384e-27	1.36863	1.32249	4.57123e-07	7.55636e-07	YES	YES	YES	YES	YES	0.87	0.55	2.77	2.16	4.51	3.12	1.6	3.66	3.91	4.11	2.22	1.81	AT4G05200.1	cysteine-rich RLK (RECEPTOR-like protein kinase) 25	Encodes a cysteine-rich receptor-like protein kinase.	cysteine-rich RLK (RECEPTOR-like protein kinase) 25 (CRK25); FUNCTIONS IN: kinase activity; INVOLVED IN: protein amino acid phosphorylation; LOCATED IN: endomembrane system; EXPRESSED IN: root; CONTAINS InterPro DOMAIN/s: Protein kinase, ATP binding site (InterPro:IPR017441), Protein kinase, catalytic domain (InterPro:IPR000719), Protein of unknown function DUF26 (InterPro:IPR002902), Serine-thre…
Potri.004G141500.v4.1		1.81411	2.55971	6.5835e-24	2.53724e-23	1.96144	2.74668	1.11567e-31	4.67535e-31	2.47163	3.15397	3.60197e-57	1.93864e-56	2.36094	3.06524	5.92111e-50	2.93407e-49	2.0006	2.8108	2.80526e-33	9.90244e-33	YES	YES	YES	YES	YES	0.83	1.06	2.75	3.76	4.09	3.1	5.56	3.48	5.12	5.29	3.96	4.35	AT3G19210.1	homolog of RAD54	Encodes RAD54, a member of the SWI2/SNF2 family of DNA-stimulated ATPases. Functions in DNA repair via homologous recombination.	homolog of RAD54 (RAD54); FUNCTIONS IN: helicase activity, DNA binding, nucleic acid binding, ATP binding; INVOLVED IN: DNA repair, response to gamma radiation, double-strand break repair via homologous recombination; LOCATED IN: cellular_component unknown; EXPRESSED IN: style (sensu Poaceae), hydathode, root, petiole, cultured cell; CONTAINS InterPro DOMAIN/s: DEAD-like helicase, N-terminal (Int…
Potri.010G216800.v4.1		2.63659	1.26535	5.7647e-18	1.83763e-17	2.918	1.58743	6.0476e-25	2.14715e-24	2.30206	1.06502	3.18671e-13	6.85205e-13	4.25109	2.77822	1.73646e-82	1.32746e-81	3.08431	1.75681	1.30217e-29	4.2726e-29	YES	YES	YES	YES	YES	0.78	0.86	2.74	5.09	5.95	3.03	4.22	3.32	17.42	16.14	8.37	7.19	AT3G54770.1	RNA-binding (RRM/RBD/RNP motifs) family protein		RNA-binding (RRM/RBD/RNP motifs) family protein; FUNCTIONS IN: RNA binding, nucleotide binding, nucleic acid binding; LOCATED IN: cellular_component unknown; EXPRESSED IN: root, gynoecium, carpel, stamen; EXPRESSED DURING: petal differentiation and expansion stage; CONTAINS InterPro DOMAIN/s: RNA recognition motif, RNP-1 (InterPro:IPR000504), Nucleotide-binding, alpha-beta plait (InterPro:IPR0126…
Potri.001G462300.v4.1		4.39236	1.60637	4.43959e-39	2.51153e-38	5.22172	2.4919	7.03453e-81	6.4372e-80	2.36355	-0.0346088	3.81808e-07	6.38817e-07	4.63673	1.92294	2.77223e-50	1.37985e-49	3.77224	1.17185	8.52599e-25	2.50202e-24	YES	YES	YES	YES	YES	0.76	0.53	2.71	15.41	26.01	2.88	3.74	3.31	17.44	16.71	9.34	10.32	AT1G30700.1	FAD-binding Berberine family protein		FAD-binding Berberine family protein; FUNCTIONS IN: electron carrier activity, oxidoreductase activity, FAD binding, catalytic activity; LOCATED IN: endomembrane system; EXPRESSED IN: stem, hypocotyl, root, stamen; EXPRESSED DURING: 4 anthesis; CONTAINS InterPro DOMAIN/s: FAD-binding, type 2 (InterPro:IPR016166), Berberine/berberine-like (InterPro:IPR012951), FAD linked oxidase, N-terminal (Inter…
Potri.004G079100.v4.1		1.90441	1.70115	1.0219e-14	2.88118e-14	2.49031	2.24532	2.10206e-32	8.97454e-32	2.39048	2.15346	5.60784e-28	1.80207e-27	2.21047	2.00851	4.60859e-23	1.36467e-22	2.98904	2.70505	1.9166e-54	9.58544e-54	YES	YES	YES	YES	YES	0.76	0.71	2.61	2.7	4.59	2.82	4.87	3.3	3.67	3.6	5.68	7.14	AT1G01580.1	ferric reduction oxidase 2	Encodes the low-iron-inducible ferric chelate reductase responsible for reduction of iron at the root surface. It is likely to be the major Fe(III) chelate reductase in Arabidopsis iron metabolism. Coordinately regulated with IRT1, the major transporter responsible for high-affinity iron uptake from the soil, at both transcriptional and posttranscriptional levels. Steady state mRNA levels are reg…	ferric reduction oxidase 2 (FRO2); CONTAINS InterPro DOMAIN/s: Ferredoxin reductase-type FAD-binding domain (InterPro:IPR017927), Ferric reductase, NAD binding (InterPro:IPR013121), FAD-binding 8 (InterPro:IPR013112), Riboflavin synthase-like beta-barrel (InterPro:IPR017938), Ferric reductase-like transmembrane component, N-terminal (InterPro:IPR013130); BEST Arabidopsis thaliana protein match is…
Potri.001G094200.v4.1		2.49415	2.60016	1.51656e-39	8.64829e-39	2.51862	2.70356	9.12422e-44	4.87453e-43	3.05611	3.15382	4.87228e-76	3.31335e-75	2.3254	2.53369	1.34933e-34	5.11769e-34	2.01066	2.31789	1.32031e-23	3.76458e-23	YES	YES	YES	YES	YES	0.76	0.63	2.53	3.9	3.93	2.66	6.68	2.87	3.62	3.83	2.99	3.15	AT5G41790.1	COP1-interactive protein 1	encodes a protein that physically interacts specifically with the putative coiled-coil region of COP1 in vitro. In hypocotyl and cotyledon protoplasts, it is associated to the cytoskeleton, but not in the root. expression is not regulated by light.	COP1-interactive protein 1 (CIP1); FUNCTIONS IN: protein binding; INVOLVED IN: regulation of protein import into nucleus; LOCATED IN: cytoskeleton, plasma membrane, chloroplast, vacuole; EXPRESSED IN: 24 plant structures; EXPRESSED DURING: 13 growth stages; CONTAINS InterPro DOMAIN/s: Prefoldin (InterPro:IPR009053); BEST Arabidopsis thaliana protein match is: myosin heavy chain-related (TAIR:AT1G…
Potri.001G270800.v4.1		3.86333	3.01792	1.19015e-89	1.45059e-88	4.39821	3.61549	2.47334e-149	4.1407e-148	4.28475	3.48618	1.52257e-135	1.72168e-134	5.42249	4.58519	0	0	4.52276	3.7604	2.06865e-172	2.86878e-171	YES	YES	YES	YES	YES	0.75	1.12	2.5	13.23	22.32	2.48	19.17	2.77	42.64	43.63	23.94	23.85	AT1G12740.1	cytochrome P450, family 87, subfamily A, polypeptide 2	encodes a protein with cytochrome P450 domain	cytochrome P450, family 87, subfamily A, polypeptide 2 (CYP87A2); FUNCTIONS IN: electron carrier activity, monooxygenase activity, iron ion binding, oxygen binding, heme binding; INVOLVED IN: oxidation reduction; EXPRESSED IN: root; CONTAINS InterPro DOMAIN/s: Cytochrome P450 (InterPro:IPR001128), Cytochrome P450, conserved site (InterPro:IPR017972), Cytochrome P450, E-class, group I (InterPro:IP…
Potri.009G064900.v4.1		4.33248	2.7669	1.13881e-83	1.29493e-82	5.17665	3.67356	2.30802e-175	4.5551e-174	3.78956	2.34406	4.92765e-56	2.61902e-55	4.9843	3.47347	3.21701e-149	4.45708e-148	3.86979	2.46466	1.65328e-60	8.97918e-60	YES	YES	YES	YES	YES	0.71	0.47	2.47	12.53	22.93	2.48	9.54	2.74	19.92	19.87	9.17	9.81	AT1G12740.1	cytochrome P450, family 87, subfamily A, polypeptide 2	encodes a protein with cytochrome P450 domain	cytochrome P450, family 87, subfamily A, polypeptide 2 (CYP87A2); FUNCTIONS IN: electron carrier activity, monooxygenase activity, iron ion binding, oxygen binding, heme binding; INVOLVED IN: oxidation reduction; EXPRESSED IN: root; CONTAINS InterPro DOMAIN/s: Cytochrome P450 (InterPro:IPR001128), Cytochrome P450, conserved site (InterPro:IPR017972), Cytochrome P450, E-class, group I (InterPro:IP…
Potri.006G050400.v4.1		7.19905	5.22969	0	0	6.39053	4.52371	0	0	6.93809	5.04389	0	0	5.72918	3.86407	1.39878e-209	2.77085e-208	5.95864	4.12773	7.75058e-263	1.69475e-261	YES	YES	YES	YES	YES	0.68	0.57	2.37	95.55	58.32	2.43	83.46	2.69	36.25	34.88	44.72	41.99	AT2G41810.1	Protein of unknown function, DUF642		FUNCTIONS IN: molecular_function unknown; INVOLVED IN: biological_process unknown; LOCATED IN: endomembrane system; EXPRESSED IN: root; CONTAINS InterPro DOMAIN/s: Protein of unknown function DUF642 (InterPro:IPR006946), Galactose-binding domain-like (InterPro:IPR008979); BEST Arabidopsis thaliana protein match is: Protein of unknown function, DUF642 (TAIR:AT2G41800.1); Has 306 Blast hits to 298 …
Potri.004G218500.v4.1		3.19237	2.13548	1.83889e-40	1.07067e-39	3.94022	2.90718	8.31707e-86	8.08333e-85	4.65395	3.55635	2.83169e-151	3.58278e-150	4.88153	3.78272	3.18797e-180	5.34422e-179	4.50456	3.46066	1.63349e-138	1.84423e-137	YES	YES	YES	YES	YES	0.67	0.43	2.3	5.02	9.31	2.4	14.74	2.58	17.57	16.85	15.21	12.2	AT1G11000.1	Seven transmembrane MLO family protein	A member of a large family of seven-transmembrane domain proteins specific to plants, homologs of the barley mildew resistance locus o (MLO) protein. The Arabidopsis genome contains 15 genes encoding MLO proteins, with localization in plasma membrane. Phylogenetic analysis revealed four clades of closely-related AtMLO genes. ATMLO4 belongs to the clade I, with AtMLO11 and AtMLO14. The gene is exp…	MILDEW RESISTANCE LOCUS O 4 (MLO4); FUNCTIONS IN: calmodulin binding; INVOLVED IN: cell death, defense response; LOCATED IN: integral to membrane, plasma membrane; EXPRESSED IN: 18 plant structures; EXPRESSED DURING: 7 growth stages; CONTAINS InterPro DOMAIN/s: Mlo-related protein (InterPro:IPR004326); BEST Arabidopsis thaliana protein match is: Seven transmembrane MLO family protein (TAIR:AT5G53…
Potri.004G091500.v4.1		1.89269	1.19693	4.58724e-11	1.09911e-10	2.4914	1.74751	4.75379e-23	1.60281e-22	2.51553	1.75509	1.77036e-23	5.10644e-23	2.68398	1.89743	1.4771e-28	4.9432e-28	1.31353	0.880705	2.54508e-05	3.85379e-05	YES	YES	YES	YES	YES	0.67	1.07	2.23	3.54	4.81	2.31	5.24	2.55	5.15	6.76	2.5	2.22	AT5G40010.1	AAA-ATPase 1		AAA-ATPase 1 (AATP1); FUNCTIONS IN: nucleoside-triphosphatase activity, ATPase activity, nucleotide binding, ATP binding; EXPRESSED IN: stem, inflorescence meristem, root, flower, stamen; EXPRESSED DURING: 4 anthesis, petal differentiation and expansion stage; CONTAINS InterPro DOMAIN/s: ATPase, AAA-type, core (InterPro:IPR003959), ATPase, AAA+ type, core (InterPro:IPR003593), ATPase, AAA-type, c…
Potri.014G066300.v4.1		5.5945	2.60086	1.0394e-90	1.28268e-89	6.92032	3.99621	5.29646e-249	1.52826e-247	7.79827	4.84171	0	0	6.43219	3.50164	7.53031e-174	1.22234e-172	6.66517	3.77076	4.24026e-216	7.51671e-215	YES	YES	YES	YES	YES	0.66	0.31	2.15	22.95	64.29	2.22	113.8	2.5	43.16	46.43	57.82	52.47	AT1G65680.1	expansin B2	member of BETA-EXPANSINS. Naming convention from the Expansin Working Group (Kende et al, 2004. Plant Mol Bio)	expansin B2 (EXPB2); INVOLVED IN: plant-type cell wall modification involved in multidimensional cell growth, unidimensional cell growth, plant-type cell wall loosening; LOCATED IN: endomembrane system, extracellular region; EXPRESSED IN: root; CONTAINS InterPro DOMAIN/s: Barwin-related endoglucanase (InterPro:IPR009009), Pollen allergen, N-terminal (InterPro:IPR014734), Rare lipoprotein A (Inter…
Potri.018G096007.v4.1		5.49004	3.46649	3.76542e-158	8.31357e-157	4.17536	2.31821	3.08658e-61	2.19039e-60	4.5166	2.61451	4.0504e-80	2.87819e-79	4.12812	2.25836	3.17996e-58	1.78583e-57	4.46146	2.61118	1.93914e-77	1.27966e-76	YES	YES	YES	YES	YES	0.64	1.19	2.04	44.43	18.14	2.18	23.25	2.46	16.24	18.44	23.11	22.53	AT4G30320.1	CAP (Cysteine-rich secretory proteins, Antigen 5, and Pathogenesis-related 1 protein) superfamily protein		CAP (Cysteine-rich secretory proteins, Antigen 5, and Pathogenesis-related 1 protein) superfamily protein; FUNCTIONS IN: molecular_function unknown; INVOLVED IN: biological_process unknown; LOCATED IN: endomembrane system, extracellular region; EXPRESSED IN: root; CONTAINS InterPro DOMAIN/s: Allergen V5/Tpx-1 related, conserved site (InterPro:IPR018244), Allergen V5/Tpx-1 related (InterPro:IPR001…
Potri.007G135000.v4.1	C2H2	2.28599	1.33085	1.24953e-15	3.66062e-15	3.01031	2.02228	2.84334e-35	1.28949e-34	4.20354	3.08667	1.61825e-102	1.42937e-101	4.3259	3.20758	2.08226e-111	2.11394e-110	3.95706	2.90346	6.81622e-85	4.89976e-84	YES	YES	YES	YES	YES	0.62	0.62	1.92	3.63	5.26	2	13.38	2.37	12.82	13.89	10.83	10.49	AT5G44160.1	C2H2-like zinc finger protein		nutcracker (NUC); FUNCTIONS IN: sequence-specific DNA binding transcription factor activity, zinc ion binding, nucleic acid binding; INVOLVED IN: regulation of transcription; LOCATED IN: intracellular; EXPRESSED IN: primary root apical meristem, stem vascular system, embryo, root, embryonic root; CONTAINS InterPro DOMAIN/s: Zinc finger, C2H2-like (InterPro:IPR015880), Zinc finger, C2H2-type (Inte…
Potri.017G081700.v4.1	HD-ZIP	1.52447	0.725116	3.24034e-06	5.95705e-06	2.03856	1.16875	4.99738e-12	1.15328e-11	2.74183	1.73092	6.44168e-26	1.97978e-25	3.22513	2.15211	3.12434e-42	1.36223e-41	1.78284	1.00444	7.55359e-09	1.35074e-08	YES	YES	YES	YES	YES	0.62	1.16	1.83	2.9	3.76	1.92	7.06	2.33	8.6	9.44	3.93	2.96	AT5G15150.1	homeobox 3	homeobox-containing gene with an unusual feature: a leucine zipper motif adjacent to the carboxyl-terminal of the homeodomain structure. This gene is expressed primarily in the cortex of the root and the stem.	homeobox 3 (HB-3); FUNCTIONS IN: sequence-specific DNA binding, DNA binding, sequence-specific DNA binding transcription factor activity; INVOLVED IN: regulation of transcription, DNA-dependent, regulation of transcription; LOCATED IN: nucleus; EXPRESSED IN: 18 plant structures; EXPRESSED DURING: 4 anthesis, F mature embryo stage, petal differentiation and expansion stage, E expanded cotyledon st…
Potri.010G181000.v4.1	AP2	2.01085	1.29006	1.30809e-12	3.36372e-12	3.83076	2.93208	8.43576e-85	8.07338e-84	4.47318	3.51264	5.0389e-142	5.95384e-141	4.81403	3.84527	5.60265e-186	9.79652e-185	3.85486	2.98072	2.40159e-87	1.76467e-86	YES	YES	YES	YES	YES	0.61	0.38	1.81	1.92	7.96	1.92	12.41	2.22	15.17	14.53	7.95	7.8	AT5G17430.1	Integrase-type DNA-binding superfamily protein	Encodes an AP2-domain containing protein similar to ANT. Expressed in embryos and lateral root primordium.	BABY BOOM (BBM); CONTAINS InterPro DOMAIN/s: DNA-binding, integrase-type (InterPro:IPR016177), Pathogenesis-related transcriptional factor/ERF, DNA-binding (InterPro:IPR001471); BEST Arabidopsis thaliana protein match is: Integrase-type DNA-binding superfamily protein (TAIR:AT1G51190.1); Has 30201 Blast hits to 17322 proteins in 780 species: Archae - 12; Bacteria - 1396; Metazoa - 17338; Fungi - …
Potri.006G247200.v4.1		3.52135	1.69611	1.76627e-33	8.78651e-33	3.54505	1.81847	1.19596e-36	5.58451e-36	4.10601	2.30813	4.43904e-59	2.44539e-58	3.91616	2.14292	1.37097e-50	6.84845e-50	3.01107	1.37658	3.0717e-22	8.47558e-22	YES	YES	YES	YES	YES	0.61	0.15	1.73	5.5	4.4	1.8	7.14	2.2	6.53	5.67	3.23	3.5	AT5G11300.1	mitotic-like cyclin 3B from Arabidopsis	mitotic-like cyclin, core cell cycle gene that is expressed only in roots (RT_PCR), portions with mitotic activity only (whole mount in situ).	mitotic-like cyclin 3B from Arabidopsis (CYC3B); FUNCTIONS IN: cyclin-dependent protein kinase regulator activity; INVOLVED IN: regulation of cell cycle; LOCATED IN: nucleus, chloroplast; EXPRESSED IN: 18 plant structures; EXPRESSED DURING: 13 growth stages; CONTAINS InterPro DOMAIN/s: Cyclin, C-terminal (InterPro:IPR004367), Cyclin (InterPro:IPR006670), G2/mitotic-specific cyclin A (InterPro:IPR…
Potri.002G178900.v4.1		1.79124	0.558212	5.33618e-07	1.02827e-06	2.07955	0.84067	2.43354e-10	5.22036e-10	1.38991	0.343885	0.000239691	0.000343611	2.62821	1.27488	1.46131e-18	3.83062e-18	2.15722	0.933378	4.21514e-11	8.25813e-11	YES	YES	YES	YES	YES	0.59	0.86	1.66	2.7	2.83	1.78	2.06	2.13	5.06	4.62	3.39	3.85	AT3G61920.1			unknown protein; FUNCTIONS IN: molecular_function unknown; INVOLVED IN: N-terminal protein myristoylation; LOCATED IN: cellular_component unknown; EXPRESSED IN: shoot, hypocotyl, root, egg cell; BEST Arabidopsis thaliana protein match is: unknown protein (TAIR:AT1G64700.1); Has 77 Blast hits to 77 proteins in 8 species: Archae - 0; Bacteria - 0; Metazoa - 0; Fungi - 0; Plants - 77; Viruses - 0; O…
Potri.005G098200.v4.1	NAC	4.87263	2.05601	1.92627e-57	1.51272e-56	5.09833	2.3737	8.0054e-73	6.65298e-72	4.96374	2.22414	8.77252e-65	5.20239e-64	4.74023	2.02244	1.43307e-54	7.6278e-54	6.10752	3.3729	5.40358e-157	6.90308e-156	YES	YES	YES	YES	YES	0.57	0.23	1.53	12.34	15.88	1.78	15.62	1.88	12.73	10.04	30.82	30.62	AT1G56010.2	NAC domain containing protein 1	Encodes a transcription factor involved in shoot apical meristem formation and auxin-mediated lateral root formation. The gene is thought not to be involved in stress responses (NaCl, auxins, ethylene). NAC1 (NAC1)	NAC domain containing protein 1 (NAC1); CONTAINS InterPro DOMAIN/s: No apical meristem (NAM) protein (InterPro:IPR003441); BEST Arabidopsis thaliana protein match is: NAC (No Apical Meristem) domain transcriptional regulator superfamily protein (TAIR:AT3G12977.1); Has 2928 Blast hits to 2921 proteins in 75 species: Archae - 0; Bacteria - 0; Metazoa - 0; Fungi - 0; Plants - 2928; Viruses - 0; Othe…
Potri.012G006800.v4.1		5.73414	3.70372	1.30945e-190	3.61035e-189	4.56717	2.68557	2.04829e-83	1.92844e-82	3.44982	1.63714	3.3533e-31	1.15513e-30	2.53227	0.865282	1.47871e-13	3.28258e-13	4.45935	2.61097	3.03043e-77	1.99701e-76	YES	YES	YES	YES	YES	0.57	0.84	1.46	41.24	19.54	1.76	8.46	1.83	4.84	3.88	16.4	18.31	AT1G05260.1	Peroxidase superfamily protein	Encodes a cold-inducible cationic peroxidase that is involved in the stress response. In response to low temperature, RCI3 transcripts accumulate in the aerial part and in roots of etiolated seedlings but only in roots of light-grown seedlings.	RARE COLD INDUCIBLE GENE 3 (RCI3); FUNCTIONS IN: peroxidase activity; INVOLVED IN: response to desiccation, response to cold, hyperosmotic salinity response; LOCATED IN: endoplasmic reticulum; EXPRESSED IN: 12 plant structures; EXPRESSED DURING: 4 anthesis, petal differentiation and expansion stage, E expanded cotyledon stage; CONTAINS InterPro DOMAIN/s: Haem peroxidase (InterPro:IPR010255), Plan…
Potri.011G159400.v4.1		2.11876	1.20539	5.14816e-13	1.34981e-12	2.75682	1.80247	1.73918e-27	6.59308e-27	5.07747	3.91764	8.06713e-207	1.41869e-205	6.54107	5.35307	0	0	3.78181	2.74122	2.08452e-73	1.31434e-72	YES	YES	YES	YES	YES	0.54	0.93	1.46	2.82	5.17	1.76	28.16	1.81	73.21	74.71	11.34	11.2	AT1G30760.1	FAD-binding Berberine family protein		FAD-binding Berberine family protein; FUNCTIONS IN: electron carrier activity, oxidoreductase activity, FAD binding, catalytic activity; LOCATED IN: endomembrane system; EXPRESSED IN: inflorescence meristem, root, flower, pedicel; EXPRESSED DURING: 4 anthesis, petal differentiation and expansion stage; CONTAINS InterPro DOMAIN/s: FAD-binding, type 2 (InterPro:IPR016166), Berberine/berberine-like …
Potri.001G051500.v4.1		6.13675	4.56641	0	0	7.57599	6.07544	0	0	8.34745	6.83637	0	0	8.50286	6.98916	0	0	8.1267	6.65377	0	0	YES	YES	YES	YES	YES	0.53	0.64	1.42	46.82	126.15	1.73	216.99	1.8	236	231.38	187.13	185.28	AT5G13930.1	Chalcone and stilbene synthase family protein	Encodes chalcone synthase (CHS), a key enzyme involved in the biosynthesis of flavonoids. Required for the accumulation of purple anthocyanins in leaves and stems. Also involved in the regulation of auxin transport and the modulation of root gravitropism.	TRANSPARENT TESTA 4 (TT4); FUNCTIONS IN: naringenin-chalcone synthase activity; INVOLVED IN: in 11 processes; LOCATED IN: plant-type vacuole membrane, endoplasmic reticulum, nucleus; EXPRESSED IN: 22 plant structures; EXPRESSED DURING: 14 growth stages; CONTAINS InterPro DOMAIN/s: Chalcone/stilbene synthase, N-terminal (InterPro:IPR001099), Thiolase-like (InterPro:IPR016039), Polyketide synthase,…
Potri.010G149400.v4.1		3.24057	2.77271	6.34431e-63	5.42273e-62	4.0154	3.57967	1.10866e-132	1.62992e-131	4.59155	4.10353	1.04719e-218	1.94228e-217	4.89285	4.39851	1.4659e-268	3.89247e-267	4.54836	4.10934	4.53351e-220	8.22893e-219	YES	YES	YES	YES	YES	0.48	0.92	1.41	7.69	11.38	1.7	19.49	1.75	22.58	22.39	18.15	18.32	AT3G17180.1	serine carboxypeptidase-like 33		serine carboxypeptidase-like 33 (scpl33); FUNCTIONS IN: serine-type carboxypeptidase activity; INVOLVED IN: proteolysis; LOCATED IN: endomembrane system; EXPRESSED IN: shoot apex, root, flower, stamen; EXPRESSED DURING: 4 anthesis, petal differentiation and expansion stage; CONTAINS InterPro DOMAIN/s: Peptidase S10, serine carboxypeptidase (InterPro:IPR001563), Peptidase S10, serine carboxypeptid…
Potri.006G058800.v4.1	bZIP	1.82371	0.40004	1.07879e-06	2.0397e-06	2.90581	1.32714	5.91609e-21	1.87801e-20	3.83672	2.13103	2.53257e-49	1.21725e-48	3.99613	2.28639	1.25624e-56	6.881e-56	4.10685	2.42504	4.76158e-63	2.65731e-62	YES	YES	YES	YES	YES	0.41	0.32	1.34	1.15	2.49	1.63	5.57	1.72	6.48	5.95	7.73	6.18	AT5G06839.3	bZIP transcription factor family protein		bZIP transcription factor family protein; FUNCTIONS IN: DNA binding, sequence-specific DNA binding transcription factor activity; INVOLVED IN: regulation of transcription, DNA-dependent; EXPRESSED IN: leaf whorl, root, flower, seed; EXPRESSED DURING: 4 anthesis, petal differentiation and expansion stage, E expanded cotyledon stage; CONTAINS InterPro DOMAIN/s: Basic-leucine zipper (bZIP) transcrip…
Potri.001G214600.v4.1		4.49038	1.011	1.40328e-27	6.03238e-27	5.03586	1.61828	4.58924e-43	2.41555e-42	4.66899	1.25413	3.59052e-32	1.2604e-31	3.84735	0.527168	8.61954e-18	2.20382e-17	2.82617	-0.278478	8.70735e-08	1.488e-07	YES	YES	YES	YES	YES	0.4	0.37	1.31	10.7	15.01	1.62	10.43	1.63	6.74	5.32	2.87	3.38	AT2G21100.1	Disease resistance-responsive (dirigent-like protein) family protein		Disease resistance-responsive (dirigent-like protein) family protein; FUNCTIONS IN: molecular_function unknown; INVOLVED IN: lignan biosynthetic process, defense response; LOCATED IN: endomembrane system; EXPRESSED IN: hypocotyl, root, flower; EXPRESSED DURING: petal differentiation and expansion stage; CONTAINS InterPro DOMAIN/s: Plant disease resistance response protein (InterPro:IPR004265); BE…
Potri.010G069000.v4.1		1.15449	0.688208	0.000381687	0.000602526	3.3602	2.50215	1.54545e-55	1.00106e-54	3.05859	2.21576	3.94248e-41	1.65825e-40	4.38964	3.43973	1.82908e-132	2.23214e-131	5.92747	4.96432	0	0	YES	YES	YES	YES	YES	0.38	0.6	1.13	1.26	5.3	1.4	4.26	1.56	10.89	11.22	33.1	33	AT3G23430.1	phosphate 1	mutant is deficient in the transfer of phosphate from root epidermal and cortical cells to the xylem. encodes protein with the mainly hydrophilic N-terminal and the C-terminal containing 6 potential membrane-spanning domains.	phosphate 1 (PHO1); INVOLVED IN: cellular response to phosphate starvation, phosphate transport; LOCATED IN: integral to membrane; EXPRESSED IN: 13 plant structures; EXPRESSED DURING: 6 growth stages; CONTAINS InterPro DOMAIN/s: EXS, C-terminal (InterPro:IPR004342), SPX, N-terminal (InterPro:IPR004331); BEST Arabidopsis thaliana protein match is: EXS (ERD1/XPR1/SYG1) family protein (TAIR:AT1G6874…
Potri.014G037800.v4.1		2.6761	0.00035876	1.61708e-08	3.40612e-08	2.68363	0.0827846	3.88541e-09	7.84189e-09	2.27153	-0.233157	4.79719e-06	7.59995e-06	3.06661	0.384554	6.03563e-13	1.31081e-12	5.09238	2.24839	7.50221e-65	4.28442e-64	YES	YES	YES	YES	YES	0.34	0.17	1.1	2.09	1.57	1.36	1.4	1.55	2	2.54	9.54	9.58	AT4G31940.1	cytochrome P450, family 82, subfamily C, polypeptide 4	member of CYP82C	cytochrome P450, family 82, subfamily C, polypeptide 4 (CYP82C4); FUNCTIONS IN: electron carrier activity, monooxygenase activity, iron ion binding, oxygen binding, heme binding; INVOLVED IN: oxidation reduction; LOCATED IN: endomembrane system; EXPRESSED IN: root; CONTAINS InterPro DOMAIN/s: Cytochrome P450 (InterPro:IPR001128), Cytochrome P450, E-class, group I (InterPro:IPR002401), Cytochrome …
Potri.016G056800.v4.1		2.10749	0.306158	9.44443e-08	1.90406e-07	1.65571	0.0468148	7.10078e-05	0.000111815	2.85627	0.965451	1.96392e-16	4.65701e-16	2.28818	0.513582	8.25495e-10	1.58124e-09	3.09884	1.21514	2.39074e-21	6.45717e-21	YES	YES	YES	YES	YES	0.33	0.91	1.09	3.61	2.3	1.36	4.74	1.48	3.46	3.11	5.68	6.35	AT2G41660.1	Protein of unknown function, DUF617	Essential for hydrotropism in roots. Mutant roots are defective in hydrotropism, and have slightly reduced phototropism and modified wavy growth response. Has normal gravitropism and root elongation.	mizu-kussei 1 (MIZ1); CONTAINS InterPro DOMAIN/s: Protein of unknown function DUF617, plant (InterPro:IPR006460); BEST Arabidopsis thaliana protein match is: Protein of unknown function, DUF617 (TAIR:AT3G25640.1); Has 258 Blast hits to 256 proteins in 14 species: Archae - 0; Bacteria - 0; Metazoa - 0; Fungi - 0; Plants - 258; Viruses - 0; Other Eukaryotes - 0 (source: NCBI BLink).
Potri.004G144600.v4.1		2.9443	-0.103613	8.95717e-09	1.91185e-08	5.50765	2.27599	1.08163e-71	8.86497e-71	5.25606	2.01126	2.33906e-58	1.27593e-57	6.71359	3.43036	5.58098e-168	8.68796e-167	7.73644	4.47825	0	0	YES	YES	YES	YES	YES	0.31	0.22	1.05	2.29	13.12	1.32	11.36	1.37	30.47	29.82	63.95	63.53	AT1G49570.1	Peroxidase superfamily protein		Peroxidase superfamily protein; FUNCTIONS IN: peroxidase activity, heme binding; INVOLVED IN: oxidation reduction, response to oxidative stress; LOCATED IN: endomembrane system; EXPRESSED IN: leaf lamina base, leaf whorl, hypocotyl, sepal, root; EXPRESSED DURING: 4 anthesis; CONTAINS InterPro DOMAIN/s: Haem peroxidase (InterPro:IPR010255), Plant peroxidase (InterPro:IPR000823), Peroxidases heam-l…
Potri.001G013000.v4.1		3.94766	1.20588	9.49273e-28	4.09543e-27	5.09894	2.37367	8.81529e-73	7.31556e-72	5.71616	2.94246	5.02717e-115	4.89073e-114	5.45227	2.69872	2.45096e-93	2.08553e-92	3.81852	1.21501	8.37711e-26	2.51806e-25	YES	YES	YES	YES	YES	0.3	0.45	1.04	5.61	14.77	1.3	21.5	1.3	18.64	15.91	4.84	6.65	AT3G49120.1	peroxidase CB	Class III peroxidase Perx34. Expressed in roots, leaves and stems. Located in the cell wall. Involved in cell elongation. Expression activated by light. May play a role in generating H2O2 during defense response.	peroxidase CB (PRXCB); FUNCTIONS IN: peroxidase activity; INVOLVED IN: oxygen and reactive oxygen species metabolic process, response to light stimulus, defense response to bacterium, defense response to fungus, unidimensional cell growth; LOCATED IN: apoplast, cell wall, plasma membrane, vacuole, plant-type cell wall; EXPRESSED IN: stem, root, guard cell, cultured cell, leaf; EXPRESSED DURING: s…
Potri.009G083100.v4.1		7.75625	3.60954	1.47636e-200	4.29467e-199	8.38405	4.32574	0	0	9.75678	5.67213	0	0	8.56599	4.49409	0	0	8.93089	4.89501	0	0	YES	YES	YES	YES	YES	0.29	0.09	1.03	39.15	69.91	1.11	178.04	1.12	85.28	75.4	107.74	108.7	AT4G33720.1	CAP (Cysteine-rich secretory proteins, Antigen 5, and Pathogenesis-related 1 protein) superfamily protein		CAP (Cysteine-rich secretory proteins, Antigen 5, and Pathogenesis-related 1 protein) superfamily protein; FUNCTIONS IN: molecular_function unknown; INVOLVED IN: biological_process unknown; LOCATED IN: endomembrane system, extracellular region; EXPRESSED IN: root; CONTAINS InterPro DOMAIN/s: Allergen V5/Tpx-1 related, conserved site (InterPro:IPR018244), Allergen V5/Tpx-1 related (InterPro:IPR001…
Potri.004G025900.v4.1		1.30852	0.749012	4.76819e-05	8.07638e-05	1.79454	1.15196	5.00681e-10	1.0575e-09	2.18908	1.45087	7.04915e-16	1.64228e-15	1.91044	1.23422	1.00951e-11	2.09177e-11	2.19977	1.50067	8.85841e-16	2.04725e-15	YES	YES	YES	YES	YES	0.25	0.58	0.98	1.11	1.61	1.06	2.07	1.03	1.39	2.08	1.95	2.38	AT4G05200.1	cysteine-rich RLK (RECEPTOR-like protein kinase) 25	Encodes a cysteine-rich receptor-like protein kinase.	cysteine-rich RLK (RECEPTOR-like protein kinase) 25 (CRK25); FUNCTIONS IN: kinase activity; INVOLVED IN: protein amino acid phosphorylation; LOCATED IN: endomembrane system; EXPRESSED IN: root; CONTAINS InterPro DOMAIN/s: Protein kinase, ATP binding site (InterPro:IPR017441), Protein kinase, catalytic domain (InterPro:IPR000719), Protein of unknown function DUF26 (InterPro:IPR002902), Serine-thre…
Potri.002G047000.v4.1		2.13615	0.488299	1.08706e-08	2.30856e-08	2.5489	0.882152	7.07756e-14	1.76179e-13	2.69712	0.995863	1.85859e-15	4.28146e-15	2.52416	0.854721	1.48664e-13	3.29985e-13	3.33757	1.58239	2.01314e-28	6.45049e-28	YES	YES	YES	YES	YES	0.24	0.59	0.9	1.49	2.89	1.01	3.54	1	2.39	2.84	4.82	4.66	AT2G38290.1	ammonium transporter 2	encodes a high-affinity ammonium transporter, which is expressed in shoot and root. Expression in root and shoot is under nitrogen and carbon dioxide regulation, respectively.	ammonium transporter 2 (AMT2); FUNCTIONS IN: ammonium transmembrane transporter activity, high affinity secondary active ammonium transmembrane transporter activity; INVOLVED IN: ammonium transport, response to nematode, cellular response to nitrogen starvation; LOCATED IN: plasma membrane; EXPRESSED IN: 24 plant structures; EXPRESSED DURING: 13 growth stages; CONTAINS InterPro DOMAIN/s: Ammonium…
Potri.010G236870.v4.1		3.31844	1.28227	4.02225e-24	1.55941e-23	3.75134	1.764	3.23834e-38	1.55895e-37	2.42621	0.61748	9.48406e-11	1.85955e-10	5.03665	2.95268	1.04686e-106	1.01468e-105	3.94787	1.97348	3.32432e-44	1.42594e-43	YES	YES	YES	YES	YES	0.22	0.9	0.87	6.7	8.64	1.01	3.17	0.93	20.77	19.83	8.28	11.45	AT1G14550.1	Peroxidase superfamily protein		Peroxidase superfamily protein; FUNCTIONS IN: peroxidase activity, heme binding; INVOLVED IN: oxidation reduction, response to oxidative stress; LOCATED IN: endomembrane system; EXPRESSED IN: root; CONTAINS InterPro DOMAIN/s: Haem peroxidase (InterPro:IPR010255), Plant peroxidase (InterPro:IPR000823), Peroxidases heam-ligand binding site (InterPro:IPR019793), Haem peroxidase, plant/fungal/bacteri…
Potri.003G176700.v4.1		6.22704	2.40977	4.25526e-83	4.78827e-82	4.55597	0.932271	1.05383e-25	3.81102e-25	5.69447	1.97586	1.54815e-59	8.58708e-59	5.12174	1.44291	9.62557e-40	4.01614e-39	4.3944	0.8144	2.09913e-22	5.81795e-22	YES	YES	YES	YES	YES	0.2	0.05	0.84	9.03	3.56	0.99	7.31	0.77	4.77	4.56	2.76	3.05	AT5G13930.1	Chalcone and stilbene synthase family protein	Encodes chalcone synthase (CHS), a key enzyme involved in the biosynthesis of flavonoids. Required for the accumulation of purple anthocyanins in leaves and stems. Also involved in the regulation of auxin transport and the modulation of root gravitropism.	TRANSPARENT TESTA 4 (TT4); FUNCTIONS IN: naringenin-chalcone synthase activity; INVOLVED IN: in 11 processes; LOCATED IN: plant-type vacuole membrane, endoplasmic reticulum, nucleus; EXPRESSED IN: 22 plant structures; EXPRESSED DURING: 14 growth stages; CONTAINS InterPro DOMAIN/s: Chalcone/stilbene synthase, N-terminal (InterPro:IPR001099), Thiolase-like (InterPro:IPR016039), Polyketide synthase,…
Potri.004G025800.v4.1		2.2726	0.852927	1.96117e-11	4.7735e-11	1.84551	0.60081	1.04009e-07	1.95084e-07	2.0059	0.718736	8.86863e-09	1.60312e-08	2.05176	0.753608	1.04685e-09	1.99583e-09	1.60512	0.458607	6.34249e-06	9.90872e-06	YES	YES	YES	YES	YES	0.2	0.56	0.77	2.19	1.61	0.97	1.64	0.68	1.6	1.82	1.71	0.91	AT4G05200.1	cysteine-rich RLK (RECEPTOR-like protein kinase) 25	Encodes a cysteine-rich receptor-like protein kinase.	cysteine-rich RLK (RECEPTOR-like protein kinase) 25 (CRK25); FUNCTIONS IN: kinase activity; INVOLVED IN: protein amino acid phosphorylation; LOCATED IN: endomembrane system; EXPRESSED IN: root; CONTAINS InterPro DOMAIN/s: Protein kinase, ATP binding site (InterPro:IPR017441), Protein kinase, catalytic domain (InterPro:IPR000719), Protein of unknown function DUF26 (InterPro:IPR002902), Serine-thre…
Potri.008G079500.v4.1		6.38548	3.20345	2.10423e-143	4.18984e-142	6.42553	3.34892	5.13688e-157	9.05796e-156	6.66297	3.55636	1.53996e-184	2.40626e-183	7.49208	4.3816	0	0	6.92398	3.86179	2.34238e-231	4.47642e-230	YES	YES	YES	YES	YES	0.19	0.03	0.73	9.99	9.84	0.79	11.83	0.62	20.99	20.61	14.91	13.99	AT1G65610.1	Six-hairpin glycosidases superfamily protein		KORRIGAN 2 (KOR2); FUNCTIONS IN: hydrolase activity, hydrolyzing O-glycosyl compounds, catalytic activity; INVOLVED IN: carbohydrate metabolic process; LOCATED IN: cellular_component unknown; EXPRESSED IN: stem, sepal, root, leaf, stamen; EXPRESSED DURING: LP.06 six leaves visible, 4 anthesis, petal differentiation and expansion stage, LP.08 eight leaves visible; CONTAINS InterPro DOMAIN/s: Six-h…
Potri.010G136500.v4.1		1.05129	-0.103872	0.0147211	0.0199937	1.97899	0.575718	2.06904e-08	4.02922e-08	2.18681	0.730907	5.58492e-10	1.06299e-09	2.397	0.897322	5.19251e-13	1.13041e-12	3.22855	1.63426	2.32985e-28	7.46022e-28	YES	YES	YES	YES	YES	0.19	0.27	0.72	0.52	0.96	0.77	1.22	0.58	1.36	1.25	2.21	2.56	AT1G68940.1	Armadillo/beta-catenin-like repeat family protein		Armadillo/beta-catenin-like repeat family protein; FUNCTIONS IN: ubiquitin-protein ligase activity, binding; INVOLVED IN: protein ubiquitination; LOCATED IN: ubiquitin ligase complex; EXPRESSED IN: root; CONTAINS InterPro DOMAIN/s: U box domain (InterPro:IPR003613), Armadillo-like helical (InterPro:IPR011989), Armadillo (InterPro:IPR000225), Armadillo-type fold (InterPro:IPR016024); BEST Arabidop…
Potri.008G193400.v4.1	C2H2	2.72254	0.17019	4.21791e-10	9.63955e-10	2.21027	-0.148499	3.47325e-06	5.96246e-06	2.44493	0.0258786	1.01444e-07	1.74622e-07	2.26344	-0.112888	8.25205e-07	1.36962e-06	2.58633	0.172091	2.322e-09	4.23963e-09	YES	YES	YES	YES	YES	0.17	0.38	0.53	2.11	1.08	0.68	1.88	0.57	1.15	1.79	1.68	2.09	AT1G10480.1	zinc finger protein 5	Encodes a zinc finger protein containing only a single zinc finger.	zinc finger protein 5 (ZFP5); FUNCTIONS IN: sequence-specific DNA binding transcription factor activity, zinc ion binding, nucleic acid binding; INVOLVED IN: regulation of transcription; LOCATED IN: intracellular, chloroplast; EXPRESSED IN: inflorescence meristem, hypocotyl, root, flower; EXPRESSED DURING: petal differentiation and expansion stage; CONTAINS InterPro DOMAIN/s: Zinc finger, C2H2-ty…
Potri.002G027000.v4.1		3.75839	-0.469299	5.78394e-09	1.24864e-08	4.49678	0.234558	5.59622e-16	1.50075e-15	3.99449	-0.209613	3.75481e-11	7.45811e-11	5.04878	0.718108	1.43025e-24	4.38914e-24	5.80924	1.46512	3.59358e-40	1.44246e-39	YES	YES	YES	YES	YES	0.14	0	0.52	1.15	1.31	0.62	1.1	0.57	2.82	2.45	4.26	4.99	AT1G75620.1	glyoxal oxidase-related protein		glyoxal oxidase-related protein; FUNCTIONS IN: molecular_function unknown; INVOLVED IN: biological_process unknown; LOCATED IN: endomembrane system; EXPRESSED IN: root, flower; EXPRESSED DURING: 4 anthesis; CONTAINS InterPro DOMAIN/s: Galactose oxidase/kelch, beta-propeller (InterPro:IPR011043), Galactose oxidase, beta-propeller (InterPro:IPR015916), Immunoglobulin E-set (InterPro:IPR014756), Gly…
Potri.016G049200.v4.1	bZIP	3.37667	-0.169836	8.60982e-10	1.93746e-09	3.31143	-0.148458	1.04414e-09	2.1686e-09	4.94512	1.27082	1.19682e-33	4.34865e-33	5.01792	1.34599	8.11367e-37	3.21125e-36	5.19416	1.54895	3.59524e-40	1.44288e-39	YES	YES	YES	YES	YES	0.13	0.03	0.5	0.72	1.01	0.53	3.01	0.54	2.99	2.85	3.55	3.24	AT5G06839.3	bZIP transcription factor family protein		bZIP transcription factor family protein; FUNCTIONS IN: DNA binding, sequence-specific DNA binding transcription factor activity; INVOLVED IN: regulation of transcription, DNA-dependent; EXPRESSED IN: leaf whorl, root, flower, seed; EXPRESSED DURING: 4 anthesis, petal differentiation and expansion stage, E expanded cotyledon stage; CONTAINS InterPro DOMAIN/s: Basic-leucine zipper (bZIP) transcrip…
Potri.019G129740.v4.1		3.87076	-0.0403957	4.42274e-12	1.11237e-11	3.59093	-0.190981	7.09102e-11	1.55424e-10	4.12442	0.245588	2.42582e-15	5.57114e-15	3.90766	0.0662476	2.02218e-13	4.46587e-13	3.53152	-0.20813	3.25337e-10	6.15681e-10	YES	YES	YES	YES	YES	0.13	0.29	0.49	3.28	2.37	0.47	3.44	0.43	3.28	3.39	2.44	2.87	AT5G66750.1	chromatin remodeling 1	Protein is similar to SWI2/SNF2 chromatin remodeling proteins. DDM1 is appears to act as a chromatin-remodeling ATPase involved in cytosine methylation in CG and non-CG contexts. Involved in gene silencing and maintenance of DNA methylation and histone methylation. Hypomethylation of many genomic regions occurs in ddm1 mutants, and can cause several phenotypic abnormalities, but some loci, such a…	chromatin remodeling 1 (CHR1); FUNCTIONS IN: helicase activity, ATPase activity; INVOLVED IN: methylation-dependent chromatin silencing, DNA mediated transformation, transposition, RNA-mediated; LOCATED IN: nucleosome; EXPRESSED IN: 21 plant structures; EXPRESSED DURING: 14 growth stages; CONTAINS InterPro DOMAIN/s: DEAD-like helicase, N-terminal (InterPro:IPR014001), DNA/RNA helicase, C-terminal…
Potri.003G083700.v4.1		2.55089	-0.239069	2.47158e-07	4.86584e-07	4.33867	1.35673	5.6166e-33	2.42837e-32	5.40244	2.33227	1.68471e-73	1.11585e-72	6.6555	3.55727	1.19076e-182	2.03526e-181	7.16138	4.09717	2.23971e-274	5.12126e-273	YES	YES	YES	YES	YES	0.11	0.17	0.49	0.93	3.25	0.35	6.83	0.25	15.77	16.14	21.85	24.77	AT5G04770.1	cationic amino acid transporter 6	Encodes a member of the cationic amino acid transporter (CAT) subfamily of amino acid polyamine choline transporters. Does not mediate efficient uptake of basic amino acids in yeast or Xenopus systems but can transport neutral and acidic amino acid analogs. Expressed in sink tissues. Induced during infestation of roots by the plant parasitic root-knot nematode, Meloidogyne incognita. Localized in…	cationic amino acid transporter 6 (CAT6); CONTAINS InterPro DOMAIN/s: Cationic amino acid transporter (InterPro:IPR015606), Amino acid/polyamine transporter I (InterPro:IPR002293), Amino acid permease domain (InterPro:IPR004841); BEST Arabidopsis thaliana protein match is: cationic amino acid transporter 7 (TAIR:AT3G10600.1); Has 1807 Blast hits to 1807 proteins in 277 species: Archae - 0; Bacter…
Potri.001G145200.v4.1		2.70748	-0.469408	2.11563e-06	3.93911e-06	6.22996	2.76214	1.18843e-105	1.40849e-104	5.59052	2.12168	3.73178e-65	2.22377e-64	5.38526	1.93338	6.80786e-57	3.74289e-56	6.4945	3.04431	3.88356e-129	4.09542e-128	YES	YES	YES	YES	YES	0.11	0.1	0.41	0.74	9.33	0.31	5.96	0.22	4.67	4.97	11.02	10.41	AT1G32450.1	nitrate transporter 1.5	Transmembrane nitrate transporter. Involved in xylem transport of nitrate from root to shoot. Induced in response to nitrate. Not involved in nitrate uptake. expressed in root pericycle cells.	nitrate transporter 1.5 (NRT1.5); CONTAINS InterPro DOMAIN/s: Oligopeptide transporter (InterPro:IPR000109), Major facilitator superfamily, general substrate transporter (InterPro:IPR016196); BEST Arabidopsis thaliana protein match is: NITRATE TRANSPORTER 1.8 (TAIR:AT4G21680.1); Has 7755 Blast hits to 7381 proteins in 1434 species: Archae - 0; Bacteria - 3851; Metazoa - 707; Fungi - 433; Plants -…
Potri.011G035600.v4.1		3.20693	0.273423	6.21131e-13	1.61959e-12	3.71984	0.797897	6.02067e-20	1.86172e-19	4.90126	1.85856	3.64215e-50	1.77571e-49	4.77206	1.74183	3.14447e-46	1.46889e-45	5.08662	2.0807	5.10735e-58	2.69118e-57	YES	YES	YES	YES	YES	0.09	0.08	0.32	0.94	1.52	0.21	3.12	0.2	2.28	2.89	3.36	3.23	AT4G21380.1	receptor kinase 3	encodes a putative receptor-like serine/threonine protein kinases that is similar to Brassica self-incompatibility (S) locus. Expressed in root. Shoot expression limited to limited to the root-hypocotyl transition zone and at the base of lateral roots as well as in axillary buds, and pedicels.	receptor kinase 3 (RK3); FUNCTIONS IN: transmembrane receptor protein serine/threonine kinase activity, kinase activity; INVOLVED IN: protein amino acid phosphorylation, recognition of pollen; LOCATED IN: plasma membrane, vacuole; EXPRESSED IN: 15 plant structures; EXPRESSED DURING: 12 growth stages; CONTAINS InterPro DOMAIN/s: Curculin-like (mannose-binding) lectin (InterPro:IPR001480), Protein …
Potri.001G312800.v4.1		3.35599	0.400171	1.36353e-14	3.82302e-14	3.86972	0.932212	1.03184e-22	3.44145e-22	5.06246	2.01104	8.03008e-57	4.30508e-56	4.56235	1.54742	2.73912e-39	1.13263e-38	4.01605	1.09044	1.10263e-25	3.30635e-25	YES	YES	YES	YES	YES	0.07	0.1	0.29	0.8	1.33	0.13	3.57	0.13	2.03	2.35	1.49	1.59	AT1G33540.1	serine carboxypeptidase-like 18		serine carboxypeptidase-like 18 (scpl18); FUNCTIONS IN: serine-type carboxypeptidase activity; INVOLVED IN: proteolysis; LOCATED IN: endomembrane system; EXPRESSED IN: root; CONTAINS InterPro DOMAIN/s: Peptidase S10, serine carboxypeptidase (InterPro:IPR001563); BEST Arabidopsis thaliana protein match is: serine carboxypeptidase-like 7 (TAIR:AT3G10450.1); Has 3653 Blast hits to 3603 proteins in 3…
Potri.008G044700.v4.1		5.21342	1.68319	1.74583e-46	1.14568e-45	5.12319	1.70149	5.2297e-46	2.9065e-45	5.26425	1.808	1.32152e-50	6.48215e-50	6.68376	3.18976	9.50866e-142	1.24837e-140	5.18221	1.77991	1.12375e-48	5.1541e-48	YES	YES	YES	YES	YES	0.06	0.26	0.26	6.32	5.69	0.12	6.2	0.12	18.96	17.6	7.07	6.32	AT3G54770.1	RNA-binding (RRM/RBD/RNP motifs) family protein		RNA-binding (RRM/RBD/RNP motifs) family protein; FUNCTIONS IN: RNA binding, nucleotide binding, nucleic acid binding; LOCATED IN: cellular_component unknown; EXPRESSED IN: root, gynoecium, carpel, stamen; EXPRESSED DURING: petal differentiation and expansion stage; CONTAINS InterPro DOMAIN/s: RNA recognition motif, RNP-1 (InterPro:IPR000504), Nucleotide-binding, alpha-beta plait (InterPro:IPR0126…
Potri.003G125600.v4.1		3.15869	0.864252	1.33261e-17	4.19969e-17	4.28643	1.97007	8.13658e-50	4.86138e-49	4.4982	2.14459	2.78389e-58	1.51646e-57	4.96499	2.59562	1.73223e-83	1.33636e-82	4.66652	2.34914	1.14663e-65	6.63044e-65	YES	YES	YES	YES	YES	0.04	0.22	0.17	1.48	2.75	0.08	3.41	0.07	4.79	4.12	4.02	3.45	AT1G63440.1	heavy metal atpase 5	The Arabidopsis P-type ATPase HMA5 is involved in Cu detoxification. hma5 mutant plants exhibit Cu hypersensitivity, which is especially dramatic in roots where HMA5 is mostly expressed.	heavy metal atpase 5 (HMA5); FUNCTIONS IN: ATPase activity, coupled to transmembrane movement of ions, phosphorylative mechanism; INVOLVED IN: detoxification of copper ion, response to copper ion; LOCATED IN: integral to membrane, membrane; EXPRESSED IN: 8 plant structures; EXPRESSED DURING: L mature pollen stage, M germinated pollen stage, 4 anthesis, petal differentiation and expansion stage; C…
Potri.012G042800.v4.1		7.30673	-0.646218	2.60002e-11	6.29877e-11	10.0741	1.91102	1.60146e-64	1.19426e-63	10.134	2.00133	7.8933e-70	5.00836e-69	11.3708	3.20112	7.24445e-155	1.04105e-153	11.2053	3.06977	1.34907e-142	1.56598e-141	YES	YES	YES	YES	YES	0	0	0.16	1.58	8.78	0	10.46	0.05	23.38	25.84	20.04	24.92	AT1G05260.1	Peroxidase superfamily protein	Encodes a cold-inducible cationic peroxidase that is involved in the stress response. In response to low temperature, RCI3 transcripts accumulate in the aerial part and in roots of etiolated seedlings but only in roots of light-grown seedlings.	RARE COLD INDUCIBLE GENE 3 (RCI3); FUNCTIONS IN: peroxidase activity; INVOLVED IN: response to desiccation, response to cold, hyperosmotic salinity response; LOCATED IN: endoplasmic reticulum; EXPRESSED IN: 12 plant structures; EXPRESSED DURING: 4 anthesis, petal differentiation and expansion stage, E expanded cotyledon stage; CONTAINS InterPro DOMAIN/s: Haem peroxidase (InterPro:IPR010255), Plan…
Potri.001G069650.v4.1		7.79533	3.26092	2.90595e-159	6.45991e-158	8.45143	4.00777	5.01096e-263	1.53984e-261	9.02236	4.555	0	0	8.43288	3.97644	7.50248e-257	1.89193e-255	8.84024	4.41971	0	0	YES	YES	YES	YES	YES	0	0.08	0.14	10.2	17.13	0	25.84	0	16.4	16.36	22.76	21.95	AT4G13420.1	high affinity K+ transporter 5	Encodes a protein of the KUP/HAK/KT potassium channel class that is upregulated in the roots by K levels.	high affinity K+ transporter 5 (HAK5); FUNCTIONS IN: potassium ion transmembrane transporter activity, potassium:sodium symporter activity; INVOLVED IN: potassium ion transport; LOCATED IN: membrane; EXPRESSED IN: 15 plant structures; EXPRESSED DURING: 8 growth stages; CONTAINS InterPro DOMAIN/s: Potassium uptake protein, kup (InterPro:IPR018519), K+ potassium transporter (InterPro:IPR003855); BE…
Potri.001G045200.v4.1		8.13583	2.24171	1.46788e-81	1.61574e-80	8.9781	3.15842	2.05913e-151	3.50552e-150	9.573	3.73166	3.91638e-227	7.48944e-226	8.91851	3.08825	1.88307e-141	2.46263e-140	9.26312	3.46868	5.65685e-187	8.50735e-186	YES	YES	YES	YES	YES	0	0.02	0.1	5.01	9.45	0	14.72	0	8.45	9.39	11.49	11.75	AT4G13420.1	high affinity K+ transporter 5	Encodes a protein of the KUP/HAK/KT potassium channel class that is upregulated in the roots by K levels.	high affinity K+ transporter 5 (HAK5); FUNCTIONS IN: potassium ion transmembrane transporter activity, potassium:sodium symporter activity; INVOLVED IN: potassium ion transport; LOCATED IN: membrane; EXPRESSED IN: 15 plant structures; EXPRESSED DURING: 8 growth stages; CONTAINS InterPro DOMAIN/s: Potassium uptake protein, kup (InterPro:IPR018519), K+ potassium transporter (InterPro:IPR003855); BE…
Potri.006G050300.v4.1		6.1365	1.64535	9.31032e-50	6.50834e-49	6.55484	2.1503	8.3112e-72	6.82874e-71	7.12037	2.67582	7.60072e-105	6.86117e-104	7.42813	2.98553	1.39708e-129	1.66525e-128	6.16158	1.79701	8.80037e-54	4.36324e-53	YES	YES	YES	YES	YES	0	0.19	0	8.07	11.23	0	15.52	0	18.92	20.2	8.55	8.28	AT2G41810.1	Protein of unknown function, DUF642		FUNCTIONS IN: molecular_function unknown; INVOLVED IN: biological_process unknown; LOCATED IN: endomembrane system; EXPRESSED IN: root; CONTAINS InterPro DOMAIN/s: Protein of unknown function DUF642 (InterPro:IPR006946), Galactose-binding domain-like (InterPro:IPR008979); BEST Arabidopsis thaliana protein match is: Protein of unknown function, DUF642 (TAIR:AT2G41800.1); Has 306 Blast hits to 298 …
Potri.001G305400.v4.1		10.203	2.02221	1.56274e-70	1.49051e-69	10.2072	2.04013	3.69583e-71	3.01099e-70	8.80305	0.730904	6.95476e-29	2.27838e-28	10.1599	2.01743	3.20239e-71	2.14766e-70	9.96846	1.85817	5.68336e-62	3.13893e-61	YES	YES	YES	YES	YES	0	0	0	8.29	6.73	0	3.29	0	8.08	6.13	5.84	6.93	AT2G38290.1	ammonium transporter 2	encodes a high-affinity ammonium transporter, which is expressed in shoot and root. Expression in root and shoot is under nitrogen and carbon dioxide regulation, respectively.	ammonium transporter 2 (AMT2); FUNCTIONS IN: ammonium transmembrane transporter activity, high affinity secondary active ammonium transmembrane transporter activity; INVOLVED IN: ammonium transport, response to nematode, cellular response to nitrogen starvation; LOCATED IN: plasma membrane; EXPRESSED IN: 24 plant structures; EXPRESSED DURING: 13 growth stages; CONTAINS InterPro DOMAIN/s: Ammonium…
Potri.010G236850.v4.1		8.42633	0.338266	1.07337e-22	3.97747e-22	9.16539	1.03676	5.87234e-35	2.64867e-34	7.7131	-0.257046	9.1328e-15	2.06325e-14	10.316	2.16515	6.15667e-79	4.52726e-78	8.61367	0.569224	3.78275e-26	1.14643e-25	YES	YES	YES	YES	YES	0	0	0	3.16	4.95	0	2.49	0	11.95	12.9	3.31	4.51	AT1G14550.1	Peroxidase superfamily protein		Peroxidase superfamily protein; FUNCTIONS IN: peroxidase activity, heme binding; INVOLVED IN: oxidation reduction, response to oxidative stress; LOCATED IN: endomembrane system; EXPRESSED IN: root; CONTAINS InterPro DOMAIN/s: Haem peroxidase (InterPro:IPR010255), Plant peroxidase (InterPro:IPR000823), Peroxidases heam-ligand binding site (InterPro:IPR019793), Haem peroxidase, plant/fungal/bacteri…

## Sheet: auxin
Gene ID	Family_ID	logFC_01_H2_vs_CK_H0	logCPM_01_H2_vs_CK_H0	PValue_01_H2_vs_CK_H0	FDR_01_H2_vs_CK_H0	logFC_02_H4_vs_CK_H0	logCPM_02_H4_vs_CK_H0	PValue_02_H4_vs_CK_H0	FDR_02_H4_vs_CK_H0	logFC_03_H6_vs_CK_H0	logCPM_03_H6_vs_CK_H0	PValue_03_H6_vs_CK_H0	FDR_03_H6_vs_CK_H0	logFC_04_H8_vs_CK_H0	logCPM_04_H8_vs_CK_H0	PValue_04_H8_vs_CK_H0	FDR_04_H8_vs_CK_H0	logFC_05_H10_vs_CK_H0	logCPM_05_H10_vs_CK_H0	PValue_05_H10_vs_CK_H0	FDR_05_H10_vs_CK_H0	Significant_01_H2_vs_CK_H0	Significant_02_H4_vs_CK_H0	Significant_03_H6_vs_CK_H0	Significant_04_H8_vs_CK_H0	Significant_05_H10_vs_CK_H0	H0_rep1	H0_rep2	H2_rep1	H2_rep2	H4_rep1	H4_rep2	H6_rep1	H6_rep2	H8_rep1	H8_rep2	H10_rep1	H10_rep2		ATH_Short_description	ATH_Curator_summary	ATH_Computational_description
Potri.001G456400.v4.1		-3.17926	5.84697	0	0	-3.51562	5.78275	0	0	-4.57552	5.78303	0	0	-5.03636	5.74141	0	0	-5.46963	5.74804	0	0	YES	YES	YES	YES	YES	47.68	47.81	5.26	5.73	4.8	4.19	1.85	2.6	1.56	1.53	1.11	1.24	AT1G76520.2	Auxin efflux carrier family protein		Auxin efflux carrier family protein; FUNCTIONS IN: auxin:hydrogen symporter activity; INVOLVED IN: auxin polar transport, transmembrane transport; LOCATED IN: endomembrane system, integral to membrane; EXPRESSED IN: 22 plant structures; EXPRESSED DURING: 13 growth stages; CONTAINS InterPro DOMAIN/s: Auxin efflux carrier (InterPro:IPR004776); BEST Arabidopsis thaliana protein match is: Auxin efflu…
Potri.002G024500.v4.1		2.11526	1.5857	5.47336e-16	1.62527e-15	2.15951	1.6963	2.8984e-18	8.45793e-18	2.86933	2.27508	1.93177e-39	7.89955e-39	3.32558	2.68371	1.24759e-60	7.21801e-60	1.77432	1.42911	3.38567e-11	6.65137e-11	YES	YES	YES	YES	YES	1.68	2	8.48	8.14	8.31	9.41	14.88	14.85	21.35	17.83	6.8	7.17	AT1G75590.1	SAUR-like auxin-responsive protein family		SAUR-like auxin-responsive protein family ; CONTAINS InterPro DOMAIN/s: Auxin responsive SAUR protein (InterPro:IPR003676); BEST Arabidopsis thaliana protein match is: SAUR-like auxin-responsive protein family (TAIR:AT5G10990.1); Has 1416 Blast hits to 1399 proteins in 25 species: Archae - 0; Bacteria - 0; Metazoa - 0; Fungi - 0; Plants - 1415; Viruses - 0; Other Eukaryotes - 1 (source: NCBI BLin…
Potri.002G024700.v4.1	ARF	1.7759	6.1271	2.00894e-235	7.09814e-234	2.08994	6.42591	0	0	1.83595	6.23171	2.05599e-285	5.00777e-284	1.78299	6.18617	8.01963e-235	1.82147e-233	2.2077	6.56056	0	0	YES	YES	YES	YES	YES	11.58	10.86	39.6	40.45	52.27	50.53	44.15	44.67	41.52	40.68	54.05	59.2	AT1G19850.1	Transcriptional factor B3 family protein / auxin-responsive factor AUX/IAA-related	Encodes a transcription factor (IAA24) mediating embryo axis formation and vascular development. Similar to AUXIN RESPONSIVE FACTOR 1 (ARF1) shown to bind to auxin responsive elements (AREs), and to the maize transcriptional activator VIVIPAROUS 1( VP1). In situ hybridization shows expression in provascular tissue of embryos, the emerging shoot primordia, then is restricted to provascular tissue,…	MONOPTEROS (MP); FUNCTIONS IN: sequence-specific DNA binding transcription factor activity, promoter binding; INVOLVED IN: in 8 processes; LOCATED IN: nucleus, membrane; EXPRESSED IN: 21 plant structures; EXPRESSED DURING: 11 growth stages; CONTAINS InterPro DOMAIN/s: Aux/IAA-ARF-dimerisation (InterPro:IPR011525), Transcriptional factor B3 (InterPro:IPR003340), AUX/IAA protein (InterPro:IPR003311…
Potri.002G072200.v4.1		1.17672	0.205373	0.00208506	0.00308283	2.46677	1.20999	8.37118e-16	2.23097e-15	2.79795	1.4728	8.2729e-22	2.28866e-21	2.52811	1.25066	4.4045e-17	1.1022e-16	2.52186	1.28214	5.82422e-17	1.39769e-16	YES	YES	YES	YES	YES	0.51	0.24	0.69	1.1	1.79	2.68	3.13	2.67	2.2	2.43	2.57	2.18	AT1G77110.1	Auxin efflux carrier family protein	Rate-limiting factor in saturable efflux of auxins. PINs are directly involved of in catalyzing cellular auxin efflux.	PIN-FORMED 6 (PIN6); FUNCTIONS IN: auxin:hydrogen symporter activity, transporter activity; INVOLVED IN: auxin polar transport; LOCATED IN: plasma membrane; EXPRESSED IN: 13 plant structures; EXPRESSED DURING: 4 anthesis, F mature embryo stage, petal differentiation and expansion stage, E expanded cotyledon stage, D bilateral stage; CONTAINS InterPro DOMAIN/s: Auxin efflux carrier, subgroup (Inte…
Potri.002G168200.v4.1		-1.50497	6.11789	1.8367e-167	4.31966e-166	-1.98211	5.99388	2.62992e-286	8.9875e-285	-1.69188	6.10717	1.83767e-226	3.50565e-225	-1.88799	6.04372	4.89875e-245	1.18582e-243	-1.81617	6.08238	1.08607e-267	2.42213e-266	YES	YES	YES	YES	YES	59.81	56.83	20.9	21.89	15.84	15.88	19.41	20.57	17.62	15.79	17.39	18.82	AT2G46370.4	Auxin-responsive GH3 family protein	Encodes a jasmonate-amido synthetase that is a member of the GH3 family of proteins. JAR1 catalyzes the formation of a biologically active jasmonyl-isoleucine (JA-Ile) conjugate. JA-Ile promotes the interaction between JAZ1 and COI1 in the jasmonate signaling pathway. JAR1 localizes to the cytoplasm and is also a phytochrome A signaling component. JAR1 is an auxin-induced gene. Loss of function m…	JASMONATE RESISTANT 1 (JAR1); FUNCTIONS IN: catalytic activity, adenylyltransferase activity, ATP binding, jasmonate-amino synthetase activity; INVOLVED IN: in 13 processes; LOCATED IN: cytoplasm; EXPRESSED IN: 24 plant structures; EXPRESSED DURING: 13 growth stages; CONTAINS InterPro DOMAIN/s: GH3 auxin-responsive promoter (InterPro:IPR004993); BEST Arabidopsis thaliana protein match is: Auxin-r…
Potri.002G249200.v4.1		-2.40817	9.3014	0	0	-3.17394	9.2126	0	0	-3.88606	9.18994	0	0	-3.93481	9.17243	0	0	-4.69758	9.16144	0	0	YES	YES	YES	YES	YES	2135.1	2122.96	413.47	415.4	263.06	241.2	160.11	154.61	149.94	143.27	91.75	89.59	AT3G07390.1	auxin-responsive family protein	isolated from differential screening of a cDNA library from auxin-treated root culture. sequence does not show homology to any known proteins and is predicted to be extracellular.	Auxin-Induced in Root cultures 12 (AIR12); FUNCTIONS IN: extracellular matrix structural constituent; INVOLVED IN: response to auxin stimulus, lateral root morphogenesis, extracellular matrix organization; LOCATED IN: extracellular region, anchored to plasma membrane, plasma membrane, anchored to membrane; EXPRESSED IN: 26 plant structures; EXPRESSED DURING: 13 growth stages; CONTAINS InterPro DO…
Potri.003G113100.v4.1		-1.0224	1.94835	2.47009e-06	4.57693e-06	1.03697	2.9802	8.70987e-13	2.08071e-12	-2.30049	1.68144	2.48035e-19	6.41521e-19	-1.3733	1.85537	3.1489e-10	6.14211e-10	-1.50593	1.84301	1.16031e-11	2.31924e-11	YES	YES	YES	YES	YES	10.16	9.36	4.29	5.69	20.36	22.41	2.37	1.93	3.9	4.03	2.69	4.78	AT4G12410.1	SAUR-like auxin-responsive protein family		SAUR-like auxin-responsive protein family ; CONTAINS InterPro DOMAIN/s: Auxin responsive SAUR protein (InterPro:IPR003676); BEST Arabidopsis thaliana protein match is: SAUR-like auxin-responsive protein family (TAIR:AT4G22620.1); Has 1137 Blast hits to 1128 proteins in 26 species: Archae - 0; Bacteria - 0; Metazoa - 0; Fungi - 0; Plants - 1136; Viruses - 0; Other Eukaryotes - 1 (source: NCBI BLin…
Potri.003G161300.v4.1		5.31645	0.38509	4.06926e-20	1.39673e-19	5.63495	0.764887	7.92886e-26	2.87724e-25	6.2714	1.34396	5.75146e-40	2.36682e-39	7.34461	2.38338	1.36417e-86	1.0811e-85	7.49511	2.57142	1.72687e-96	1.39108e-95	YES	YES	YES	YES	YES	0.03	0.03	1.58	1.45	2.27	1.62	3.3	2.94	6.45	6.16	6.66	7.73	AT1G28130.1	Auxin-responsive GH3 family protein	encodes an IAA-amido synthase that conjugates Asp and other amino acids to auxin in vitro. Lines carrying insertions in this gene are hypersensitive to auxin.	GH3.17; CONTAINS InterPro DOMAIN/s: GH3 auxin-responsive promoter (InterPro:IPR004993); BEST Arabidopsis thaliana protein match is: Auxin-responsive GH3 family protein (TAIR:AT5G54510.1); Has 1405 Blast hits to 1296 proteins in 239 species: Archae - 0; Bacteria - 491; Metazoa - 54; Fungi - 2; Plants - 672; Viruses - 0; Other Eukaryotes - 186 (source: NCBI BLink).
Potri.004G124200.v4.1		-1.93871	0.74832	2.31891e-08	4.84195e-08	-1.91012	0.709715	3.81237e-09	7.69783e-09	-1.95868	0.766716	6.52433e-09	1.18632e-08	-2.20628	0.694701	2.79193e-10	5.46042e-10	-1.86248	0.780709	1.18916e-08	2.1128e-08	YES	YES	YES	YES	YES	2.91	2.91	0.6	0.98	0.71	0.94	0.96	0.66	0.69	0.63	0.42	1.29	AT5G15100.1	Auxin efflux carrier family protein		PIN-FORMED 8 (PIN8); FUNCTIONS IN: auxin:hydrogen symporter activity, transporter activity; INVOLVED IN: auxin polar transport, transmembrane transport; LOCATED IN: endomembrane system, integral to membrane; EXPRESSED IN: 9 plant structures; EXPRESSED DURING: 6 growth stages; CONTAINS InterPro DOMAIN/s: Auxin efflux carrier, subgroup (InterPro:IPR014024), Auxin efflux carrier (InterPro:IPR004776)…
Potri.004G172800.v4.1		2.86287	3.0496	4.13172e-64	3.58825e-63	3.2402	3.47152	5.91151e-100	6.6265e-99	3.21196	3.43068	1.33501e-96	1.11842e-95	3.12178	3.35729	8.2707e-88	6.65527e-87	3.18378	3.45084	2.37741e-97	1.93435e-96	YES	YES	YES	YES	YES	1.09	1.53	10.26	9.65	13.99	12.77	14.09	12.89	13.51	10.76	12.2	13.98	AT2G21050.1	like AUXIN RESISTANT 2	Encodes LAX2 (LIKE AUXIN RESISTANT), a member of the AUX1 LAX family of auxin influx carriers. Required for the establishment of embryonic root cell organization.	like AUXIN RESISTANT 2 (LAX2); CONTAINS InterPro DOMAIN/s: Amino acid transporter, transmembrane (InterPro:IPR013057); BEST Arabidopsis thaliana protein match is: like AUX1 3 (TAIR:AT1G77690.1); Has 1017 Blast hits to 1012 proteins in 134 species: Archae - 0; Bacteria - 2; Metazoa - 94; Fungi - 224; Plants - 668; Viruses - 0; Other Eukaryotes - 29 (source: NCBI BLink).
Potri.005G099300.v4.1		-3.16784	9.16893	0	0	-3.82114	9.12195	0	0	-5.85819	9.08361	0	0	-5.45492	9.07666	0	0	-6.51467	9.08531	0	0	YES	YES	YES	YES	YES	528.84	522.15	60.71	61.04	39.5	40.45	10.42	9.61	12.21	13.33	6.72	5.9	AT2G17500.4	Auxin efflux carrier family protein		Auxin efflux carrier family protein; FUNCTIONS IN: auxin:hydrogen symporter activity; INVOLVED IN: auxin polar transport, transmembrane transport; LOCATED IN: endomembrane system, integral to membrane; EXPRESSED IN: 19 plant structures; EXPRESSED DURING: 13 growth stages; CONTAINS InterPro DOMAIN/s: Auxin efflux carrier (InterPro:IPR004776); BEST Arabidopsis thaliana protein match is: Auxin efflu…
Potri.005G187500.v4.1		2.66638	2.65583	3.33784e-45	2.13914e-44	3.10911	3.12971	4.26615e-77	3.73006e-76	3.03928	3.05297	1.13104e-70	7.25123e-70	3.19288	3.19438	7.80784e-81	5.85662e-80	2.76189	2.85499	9.1157e-55	4.58143e-54	YES	YES	YES	YES	YES	1.12	1.19	7.34	7.99	11.05	10.44	11.31	9.73	11.72	10.77	8.08	9.12	AT1G77110.1	Auxin efflux carrier family protein	Rate-limiting factor in saturable efflux of auxins. PINs are directly involved of in catalyzing cellular auxin efflux.	PIN-FORMED 6 (PIN6); FUNCTIONS IN: auxin:hydrogen symporter activity, transporter activity; INVOLVED IN: auxin polar transport; LOCATED IN: plasma membrane; EXPRESSED IN: 13 plant structures; EXPRESSED DURING: 4 anthesis, F mature embryo stage, petal differentiation and expansion stage, E expanded cotyledon stage, D bilateral stage; CONTAINS InterPro DOMAIN/s: Auxin efflux carrier, subgroup (Inte…
Potri.006G211000.v4.1		-2.27837	0.0964209	3.60654e-07	7.03081e-07	-1.95621	0.101312	1.22223e-06	2.15632e-06	-2.01742	0.158022	1.23446e-06	2.0136e-06	-2.17168	0.103654	3.00047e-07	5.09113e-07	-1.9047	0.17253	1.65228e-06	2.65326e-06	YES	YES	YES	YES	YES	1.94	1.48	0.31	0.41	0.18	0.74	0.38	0.54	0.4	0.39	0.45	0.53	AT2G36210.1	SAUR-like auxin-responsive protein family		SAUR-like auxin-responsive protein family ; CONTAINS InterPro DOMAIN/s: Auxin responsive SAUR protein (InterPro:IPR003676); BEST Arabidopsis thaliana protein match is: SAUR-like auxin-responsive protein family (TAIR:AT4G34780.1); Has 925 Blast hits to 921 proteins in 25 species: Archae - 0; Bacteria - 0; Metazoa - 0; Fungi - 0; Plants - 924; Viruses - 0; Other Eukaryotes - 1 (source: NCBI BLink).
Potri.006G278100.v4.1		3.15571	-0.125447	5.15956e-10	1.17337e-09	3.77141	0.470504	2.4437e-16	6.63314e-16	4.74569	1.32035	3.96144e-34	1.45224e-33	5.43065	1.97851	5.57329e-59	3.16079e-58	4.807	1.42897	1.66641e-36	6.22845e-36	YES	YES	YES	YES	YES	0.11	0.21	1.77	1.34	1.81	3.14	3.52	6.59	8.21	7.29	5.41	5.03	AT2G24400.1	SAUR-like auxin-responsive protein family		SAUR-like auxin-responsive protein family ; CONTAINS InterPro DOMAIN/s: Auxin responsive SAUR protein (InterPro:IPR003676); BEST Arabidopsis thaliana protein match is: SAUR-like auxin-responsive protein family (TAIR:AT4G31320.1); Has 1369 Blast hits to 1358 proteins in 26 species: Archae - 0; Bacteria - 0; Metazoa - 0; Fungi - 0; Plants - 1368; Viruses - 0; Other Eukaryotes - 1 (source: NCBI BLin…
Potri.007G050300.v4.1		-1.12419	6.56132	1.82079e-120	3.02388e-119	-1.56484	6.43245	3.77815e-227	9.89151e-226	-2.43776	6.3015	0	0	-2.11936	6.3362	0	0	-3.59825	6.16969	0	0	YES	YES	YES	YES	YES	82.94	78.54	38.65	38.37	30.57	28.1	17.95	14.92	20.64	18.76	7.18	7.41	AT2G14960.1	Auxin-responsive GH3 family protein	encodes a protein similar to IAA-amido synthases. Lines carrying an insertion in this gene are hypersensitive to auxin.	GH3.1; CONTAINS InterPro DOMAIN/s: GH3 auxin-responsive promoter (InterPro:IPR004993); BEST Arabidopsis thaliana protein match is: Auxin-responsive GH3 family protein (TAIR:AT4G37390.1); Has 1628 Blast hits to 1412 proteins in 230 species: Archae - 1; Bacteria - 595; Metazoa - 55; Fungi - 2; Plants - 676; Viruses - 0; Other Eukaryotes - 299 (source: NCBI BLink).
Potri.008G129400.v4.1		-1.30671	7.07223	6.60352e-201	1.92835e-199	-1.73991	6.95788	0	0	-1.76432	6.99445	0	0	-1.75676	6.97946	0	0	-2.27993	6.89757	0	0	YES	YES	YES	YES	YES	74.03	74.04	30.4	32	23.5	24.19	25.39	22.86	22.64	24.06	15.96	17.35	AT1G70940.1	Auxin efflux carrier family protein	A regulator of auxin efflux and involved in differential growth. PIN3 is expressed in gravity-sensing tissues, with PIN3 protein accumulating predominantly at the lateral cell surface. PIN3 localizes to the plasma membrane and to vesicles. In roots, PIN3 is expressed without pronounced polarity in tiers two and three of the columella cells, at the basal side of vascular cells, and to the lateral …	PIN-FORMED 3 (PIN3); FUNCTIONS IN: auxin:hydrogen symporter activity, transporter activity; INVOLVED IN: in 8 processes; LOCATED IN: lateral plasma membrane, plasma membrane, vesicle membrane, cell surface; EXPRESSED IN: 26 plant structures; EXPRESSED DURING: 13 growth stages; CONTAINS InterPro DOMAIN/s: Auxin efflux carrier, subgroup (InterPro:IPR014024), Auxin efflux carrier (InterPro:IPR004776…
Potri.009G092900.v4.1		-1.67784	8.25278	0	0	-2.38537	8.11656	0	0	-4.156	7.98152	0	0	-3.28933	8.02667	0	0	-5.19908	7.94724	0	0	YES	YES	YES	YES	YES	295.31	287.98	93.02	96.73	61.52	58.5	19.48	16.62	31.13	32.34	8.29	9.07	AT2G14960.1	Auxin-responsive GH3 family protein	encodes a protein similar to IAA-amido synthases. Lines carrying an insertion in this gene are hypersensitive to auxin.	GH3.1; CONTAINS InterPro DOMAIN/s: GH3 auxin-responsive promoter (InterPro:IPR004993); BEST Arabidopsis thaliana protein match is: Auxin-responsive GH3 family protein (TAIR:AT4G37390.1); Has 1628 Blast hits to 1412 proteins in 230 species: Archae - 1; Bacteria - 595; Metazoa - 55; Fungi - 2; Plants - 676; Viruses - 0; Other Eukaryotes - 299 (source: NCBI BLink).
Potri.009G125900.v4.1		2.60799	2.73339	7.69588e-46	4.9955e-45	2.31224	2.57072	5.07571e-36	2.33945e-35	2.33627	2.58101	2.29102e-36	8.80122e-36	2.27502	2.53615	2.19052e-33	8.116e-33	3.25667	3.41803	1.04883e-97	8.56929e-97	YES	YES	YES	YES	YES	4.48	5.23	29.34	32.11	24.55	27.13	28.33	25.27	28.75	20.59	49.11	54.24	AT1G75590.1	SAUR-like auxin-responsive protein family		SAUR-like auxin-responsive protein family ; CONTAINS InterPro DOMAIN/s: Auxin responsive SAUR protein (InterPro:IPR003676); BEST Arabidopsis thaliana protein match is: SAUR-like auxin-responsive protein family (TAIR:AT5G10990.1); Has 1416 Blast hits to 1399 proteins in 25 species: Archae - 0; Bacteria - 0; Metazoa - 0; Fungi - 0; Plants - 1415; Viruses - 0; Other Eukaryotes - 1 (source: NCBI BLin…
Potri.009G126000.v4.1		4.47312	2.04147	3.59061e-54	2.67987e-53	3.97523	1.6842	3.46454e-37	1.63656e-36	4.03122	1.71284	1.35502e-38	5.43471e-38	3.97957	1.67539	6.73369e-38	2.72179e-37	4.44842	2.14905	3.38726e-55	1.7156e-54	YES	YES	YES	YES	YES	1.26	1.35	29.04	31.75	20.9	23.52	22.35	24.63	23.08	20.67	29.92	34.85	AT4G34760.1	SAUR-like auxin-responsive protein family		SAUR-like auxin-responsive protein family ; CONTAINS InterPro DOMAIN/s: Auxin responsive SAUR protein (InterPro:IPR003676); BEST Arabidopsis thaliana protein match is: SAUR-like auxin-responsive protein family (TAIR:AT2G16580.1); Has 1475 Blast hits to 1458 proteins in 28 species: Archae - 0; Bacteria - 0; Metazoa - 0; Fungi - 0; Plants - 1474; Viruses - 0; Other Eukaryotes - 1 (source: NCBI BLin…
Potri.012G023400.v4.1		-1.45447	4.82249	1.33995e-66	1.2114e-65	-1.0311	4.93483	2.18041e-42	1.13528e-41	-1.70465	4.79232	3.66313e-91	2.92338e-90	-2.1373	4.67937	2.66554e-120	2.93646e-119	-1.39924	4.87263	9.27273e-72	5.73441e-71	YES	YES	YES	YES	YES	82.25	83.16	29.54	32.97	38.6	47.82	27.86	27.6	17.49	22.36	33.57	35.63	AT2G46690.1	SAUR-like auxin-responsive protein family		SAUR-like auxin-responsive protein family ; CONTAINS InterPro DOMAIN/s: Auxin responsive SAUR protein (InterPro:IPR003676); BEST Arabidopsis thaliana protein match is: SAUR-like auxin-responsive protein family (TAIR:AT3G61900.1); Has 1291 Blast hits to 1280 proteins in 26 species: Archae - 0; Bacteria - 0; Metazoa - 0; Fungi - 0; Plants - 1290; Viruses - 0; Other Eukaryotes - 1 (source: NCBI BLin…
Potri.012G106100.v4.1	ARF	-1.20885	7.8157	1.2247e-223	4.09779e-222	-1.42505	7.75954	0	0	-1.58203	7.75518	0	0	-1.69226	7.7129	0	0	-1.38968	7.817	0	0	YES	YES	YES	YES	YES	93.54	95.42	43.66	41.47	38.54	37.23	33.98	36.1	31.26	31.02	39.94	38.98	AT5G62000.3	auxin response factor 2	.	auxin response factor 2 (ARF2); FUNCTIONS IN: protein binding, sequence-specific DNA binding transcription factor activity; INVOLVED IN: in 7 processes; LOCATED IN: nucleus, chloroplast; EXPRESSED IN: 24 plant structures; EXPRESSED DURING: 13 growth stages; CONTAINS InterPro DOMAIN/s: Aux/IAA-ARF-dimerisation (InterPro:IPR011525), Transcriptional factor B3 (InterPro:IPR003340), AUX/IAA protein (I…
Potri.013G151100.v4.1		-1.53525	3.09224	1.86301e-24	7.30007e-24	-4.47989	2.68059	9.18492e-90	9.26893e-89	-3.12082	2.85529	2.21756e-63	1.28896e-62	-2.60578	2.88827	6.46894e-52	3.3108e-51	-3.84878	2.78205	1.25527e-79	8.47397e-79	YES	YES	YES	YES	YES	9.1	9.19	3.31	3.24	0.28	0.58	1.16	1.15	1.56	1.62	0.79	0.6	AT5G54510.1	Auxin-responsive GH3 family protein	Encodes an IAA-amido synthase that conjugates Ala, Asp, Phe, and Trp to auxin. Lines overexpressing this gene accumulate IAA-ASP and are hypersensitive to several auxins. Identified as a dominant mutation that displays shorter hypocotyls in light grown plants when compared to wild type siblings. Protein is similar to auxin inducible gene from pea (GH3).	DWARF IN LIGHT 1 (DFL1); FUNCTIONS IN: indole-3-acetic acid amido synthetase activity; INVOLVED IN: auxin homeostasis, response to auxin stimulus, auxin mediated signaling pathway, unidimensional cell growth; LOCATED IN: chloroplast, cytoplasm; EXPRESSED IN: 19 plant structures; EXPRESSED DURING: 12 growth stages; CONTAINS InterPro DOMAIN/s: GH3 auxin-responsive promoter (InterPro:IPR004993); BES…
Potri.014G095500.v4.1		-2.43788	8.45801	0	0	-3.22096	8.36279	0	0	-3.39534	8.38566	0	0	-3.1125	8.39678	0	0	-2.86026	8.4505	0	0	YES	YES	YES	YES	YES	418.67	418.2	79.95	80.69	46.28	50.11	45.24	42.62	53.38	49.27	60.7	65.49	AT2G46370.4	Auxin-responsive GH3 family protein	Encodes a jasmonate-amido synthetase that is a member of the GH3 family of proteins. JAR1 catalyzes the formation of a biologically active jasmonyl-isoleucine (JA-Ile) conjugate. JA-Ile promotes the interaction between JAZ1 and COI1 in the jasmonate signaling pathway. JAR1 localizes to the cytoplasm and is also a phytochrome A signaling component. JAR1 is an auxin-induced gene. Loss of function m…	JASMONATE RESISTANT 1 (JAR1); FUNCTIONS IN: catalytic activity, adenylyltransferase activity, ATP binding, jasmonate-amino synthetase activity; INVOLVED IN: in 13 processes; LOCATED IN: cytoplasm; EXPRESSED IN: 24 plant structures; EXPRESSED DURING: 13 growth stages; CONTAINS InterPro DOMAIN/s: GH3 auxin-responsive promoter (InterPro:IPR004993); BEST Arabidopsis thaliana protein match is: Auxin-r…
Potri.014G100100.v4.1	ARF	-1.97955	2.5459	7.44046e-26	3.02451e-25	-2.17077	2.46665	2.95567e-32	1.25657e-31	-2.00866	2.56372	1.61453e-28	5.24151e-28	-2.88739	2.4005	2.06834e-43	9.20378e-43	-2.7662	2.43421	4.73865e-42	1.96518e-41	YES	YES	YES	YES	YES	3.85	3.84	0.92	1.11	1.03	0.81	1.17	0.93	0.52	0.58	0.68	0.55	AT3G61830.1	auxin response factor 18		auxin response factor 18 (ARF18); FUNCTIONS IN: sequence-specific DNA binding transcription factor activity; INVOLVED IN: response to hormone stimulus, regulation of transcription, DNA-dependent, regulation of transcription; LOCATED IN: nucleus; EXPRESSED IN: 22 plant structures; EXPRESSED DURING: 13 growth stages; CONTAINS InterPro DOMAIN/s: Aux/IAA-ARF-dimerisation (InterPro:IPR011525), Transcr…
Potri.016G035300.v4.1		2.48807	3.30284	7.4714e-62	6.27746e-61	2.60107	3.4804	4.60735e-76	3.99522e-75	2.76745	3.61137	4.86258e-90	3.83615e-89	2.76885	3.61637	1.93097e-89	1.58082e-88	2.28943	3.24806	1.74414e-54	8.72849e-54	YES	YES	YES	YES	YES	1.47	1.71	9.5	9.17	10.45	10.43	12.06	12.06	11.51	11.69	8.76	8.37	AT1G73590.1	Auxin efflux carrier family protein	Encodes an auxin efflux carrier involved in shoot and root development. It is involved in the maintenance of embryonic auxin gradients. Loss of function severely affects organ initiation, pin1 mutants are characterised by an inflorescence meristem that does not initiate any flowers, resulting in the formation of a naked inflorescence stem. PIN1 is involved in the determination of leaf shape by ac…	PIN-FORMED 1 (PIN1); FUNCTIONS IN: transporter activity; INVOLVED IN: in 14 processes; LOCATED IN: apical part of cell, plasma membrane, membrane, basal plasma membrane, cytoplasm; EXPRESSED IN: 25 plant structures; EXPRESSED DURING: 13 growth stages; CONTAINS InterPro DOMAIN/s: Auxin efflux carrier, subgroup (InterPro:IPR014024), Auxin efflux carrier (InterPro:IPR004776); BEST Arabidopsis thalia…
Potri.017G122400.v4.1		-1.36486	4.42195	1.47464e-45	9.52265e-45	-1.66534	4.32146	5.6521e-69	4.46807e-68	-1.31508	4.4677	1.5165e-47	7.08941e-47	-1.35156	4.43718	5.98914e-48	2.87764e-47	-2.05818	4.28996	9.36947e-96	7.49366e-95	YES	YES	YES	YES	YES	15.81	16.44	6.27	6.79	5.43	5.5	6.71	7.68	6.43	7.05	4.06	4.41	AT1G71090.1	Auxin efflux carrier family protein		Auxin efflux carrier family protein; FUNCTIONS IN: auxin:hydrogen symporter activity; INVOLVED IN: auxin polar transport, transmembrane transport; LOCATED IN: integral to membrane; EXPRESSED IN: 22 plant structures; EXPRESSED DURING: 13 growth stages; CONTAINS InterPro DOMAIN/s: Auxin efflux carrier (InterPro:IPR004776); BEST Arabidopsis thaliana protein match is: Auxin efflux carrier family prot…
Potri.001G006700.v4.1		1.8429	5.23751	2.79048e-136	5.27429e-135	2.4059	5.75475	3.02781e-293	1.05813e-291	2.84424	6.13185	0	0	2.5578	5.88251	0	0	2.35468	5.74736	2.85253e-289	6.91967e-288	YES	YES	YES	YES	YES	9.65	9.41	35.69	35.46	53.02	55.57	76.79	74.69	60.43	58.88	54.14	52.7	AT1G55320.1	acyl-activating enzyme 18	Encodes a protein with similarity to acyl activating enzymes. AAE18 is localized to the peroxisome where it may be involved in metabolism of auxin precursors to active auxins.	acyl-activating enzyme 18 (AAE18); FUNCTIONS IN: catalytic activity, ligase activity; INVOLVED IN: metabolic process, auxin metabolic process; LOCATED IN: peroxisome; EXPRESSED IN: guard cell; CONTAINS InterPro DOMAIN/s: AMP-binding, conserved site (InterPro:IPR020845), AMP-dependent synthetase/ligase (InterPro:IPR000873); BEST Arabidopsis thaliana protein match is: acyl-activating enzyme 17 (TAI…
Potri.001G027700.v4.1	SRS	1.70228	2.02111	4.25961e-15	1.22174e-14	2.46944	2.70383	1.70224e-42	8.88106e-42	2.50709	2.72244	8.79125e-44	3.84773e-43	2.56453	2.77601	5.36936e-46	2.49683e-45	2.34895	2.63401	2.53544e-37	9.63123e-37	YES	YES	YES	YES	YES	2.81	1.28	6.73	6.99	11.87	12.23	11.63	13.83	12.88	12.55	10.84	11.83	AT5G12330.2	Lateral root primordium (LRP) protein-related	A member of SHI gene family. Arabidopsis thaliana has ten members that encode proteins with a RING finger-like zinc finger motif. Despite being highly divergent in sequence, many of the SHI-related genes are partially redundant in function and synergistically promote gynoecium, stamen and leaf development in Arabidopsis. Expressed in lateral root primordia and induced by auxin. SWP1 is involved i…	LATERAL ROOT PRIMORDIUM 1 (LRP1); FUNCTIONS IN: protein homodimerization activity; INVOLVED IN: response to auxin stimulus, root development; LOCATED IN: cellular_component unknown; EXPRESSED IN: 15 plant structures; EXPRESSED DURING: 7 growth stages; CONTAINS InterPro DOMAIN/s: Lateral Root Primordium type 1, C-terminal (InterPro:IPR006511), Zinc finger, Lateral Root Primordium type 1 (InterPro:…
Potri.001G051500.v4.1		6.13675	4.56641	0	0	7.57599	6.07544	0	0	8.34745	6.83637	0	0	8.50286	6.98916	0	0	8.1267	6.65377	0	0	YES	YES	YES	YES	YES	0.53	0.64	42.09	46.82	126.15	122.54	216.99	219.62	236	231.38	187.13	185.28	AT5G13930.1	Chalcone and stilbene synthase family protein	Encodes chalcone synthase (CHS), a key enzyme involved in the biosynthesis of flavonoids. Required for the accumulation of purple anthocyanins in leaves and stems. Also involved in the regulation of auxin transport and the modulation of root gravitropism.	TRANSPARENT TESTA 4 (TT4); FUNCTIONS IN: naringenin-chalcone synthase activity; INVOLVED IN: in 11 processes; LOCATED IN: plant-type vacuole membrane, endoplasmic reticulum, nucleus; EXPRESSED IN: 22 plant structures; EXPRESSED DURING: 14 growth stages; CONTAINS InterPro DOMAIN/s: Chalcone/stilbene synthase, N-terminal (InterPro:IPR001099), Thiolase-like (InterPro:IPR016039), Polyketide synthase,…
Potri.001G051600.v4.1		3.59415	6.24394	0	0	4.72062	7.36645	0	0	5.29214	7.92779	0	0	5.08006	7.71618	0	0	4.96588	7.64123	0	0	YES	YES	YES	YES	YES	11.82	11.96	147.93	150.06	345.19	327.1	508.29	518.31	433.43	418.8	404.93	410.43	AT5G13930.1	Chalcone and stilbene synthase family protein	Encodes chalcone synthase (CHS), a key enzyme involved in the biosynthesis of flavonoids. Required for the accumulation of purple anthocyanins in leaves and stems. Also involved in the regulation of auxin transport and the modulation of root gravitropism.	TRANSPARENT TESTA 4 (TT4); FUNCTIONS IN: naringenin-chalcone synthase activity; INVOLVED IN: in 11 processes; LOCATED IN: plant-type vacuole membrane, endoplasmic reticulum, nucleus; EXPRESSED IN: 22 plant structures; EXPRESSED DURING: 14 growth stages; CONTAINS InterPro DOMAIN/s: Chalcone/stilbene synthase, N-terminal (InterPro:IPR001099), Thiolase-like (InterPro:IPR016039), Polyketide synthase,…
Potri.001G431700.v4.1		5.38848	6.78825	0	0	5.40162	6.86245	0	0	5.35545	6.81875	0	0	5.17102	6.6377	0	0	6.16596	7.64578	0	0	YES	YES	YES	YES	YES	9.32	7.84	365.51	377.35	386.67	388.03	394.37	374.27	323.48	328.57	676.15	678.94	AT1G78380.1	glutathione S-transferase TAU 19	Encodes a glutathione transferase that is a member of Tau GST gene family. Expression is induced by drought stress, oxidative stress, and high doses of auxin and cytokinin. naming convention according to Wagner et al. (2002) The expression of this gene is upregulated by herbicide safeners such as benoxacor and fenclorim.	glutathione S-transferase TAU 19 (GSTU19); FUNCTIONS IN: glutathione transferase activity, glutathione binding; INVOLVED IN: response to oxidative stress, response to cadmium ion, response to cyclopentenone, toxin catabolic process, cellular response to water deprivation; LOCATED IN: chloroplast, plasma membrane, chloroplast stroma, cytoplasm; EXPRESSED IN: 26 plant structures; EXPRESSED DURING: …
Potri.001G436500.v4.1		1.53292	3.9536	6.96212e-43	4.25538e-42	1.65069	4.10287	1.16094e-56	7.68103e-56	1.51681	4.00479	1.36216e-45	6.15285e-45	1.73165	4.16402	4.89027e-62	2.88601e-61	1.57761	4.08227	4.57102e-53	2.24174e-52	YES	YES	YES	YES	YES	14.86	16.04	46.26	46.28	52.93	50.95	51.91	44.83	54.19	54.2	52.86	49.23	AT1G78380.1	glutathione S-transferase TAU 19	Encodes a glutathione transferase that is a member of Tau GST gene family. Expression is induced by drought stress, oxidative stress, and high doses of auxin and cytokinin. naming convention according to Wagner et al. (2002) The expression of this gene is upregulated by herbicide safeners such as benoxacor and fenclorim.	glutathione S-transferase TAU 19 (GSTU19); FUNCTIONS IN: glutathione transferase activity, glutathione binding; INVOLVED IN: response to oxidative stress, response to cadmium ion, response to cyclopentenone, toxin catabolic process, cellular response to water deprivation; LOCATED IN: chloroplast, plasma membrane, chloroplast stroma, cytoplasm; EXPRESSED IN: 26 plant structures; EXPRESSED DURING: …
Potri.001G437000.v4.1		3.00976	1.02065	1.97714e-18	6.41695e-18	3.26877	1.33458	4.2154e-25	1.50494e-24	3.70849	1.70656	1.81873e-35	6.86185e-35	4.57954	2.51931	7.58878e-74	5.2493e-73	4.77846	2.74701	8.43053e-90	6.36582e-89	YES	YES	YES	YES	YES	0.72	1.1	6.75	8.09	8.65	9.64	13.05	12.31	23.52	21.18	26.78	27.03	AT1G78380.1	glutathione S-transferase TAU 19	Encodes a glutathione transferase that is a member of Tau GST gene family. Expression is induced by drought stress, oxidative stress, and high doses of auxin and cytokinin. naming convention according to Wagner et al. (2002) The expression of this gene is upregulated by herbicide safeners such as benoxacor and fenclorim.	glutathione S-transferase TAU 19 (GSTU19); FUNCTIONS IN: glutathione transferase activity, glutathione binding; INVOLVED IN: response to oxidative stress, response to cadmium ion, response to cyclopentenone, toxin catabolic process, cellular response to water deprivation; LOCATED IN: chloroplast, plasma membrane, chloroplast stroma, cytoplasm; EXPRESSED IN: 26 plant structures; EXPRESSED DURING: …
Potri.001G437200.v4.1		2.02783	1.29835	6.52608e-13	1.7001e-12	1.99996	1.34982	3.33859e-13	8.09577e-13	2.08829	1.41357	3.3875e-14	7.5129e-14	1.799	1.19188	1.72975e-10	3.41814e-10	3.44351	2.60467	1.21541e-59	6.53163e-59	YES	YES	YES	YES	YES	1.61	2.26	7.58	8.79	8.94	7.68	8.91	9.05	6.13	8.22	22.7	23.93	AT1G78380.1	glutathione S-transferase TAU 19	Encodes a glutathione transferase that is a member of Tau GST gene family. Expression is induced by drought stress, oxidative stress, and high doses of auxin and cytokinin. naming convention according to Wagner et al. (2002) The expression of this gene is upregulated by herbicide safeners such as benoxacor and fenclorim.	glutathione S-transferase TAU 19 (GSTU19); FUNCTIONS IN: glutathione transferase activity, glutathione binding; INVOLVED IN: response to oxidative stress, response to cadmium ion, response to cyclopentenone, toxin catabolic process, cellular response to water deprivation; LOCATED IN: chloroplast, plasma membrane, chloroplast stroma, cytoplasm; EXPRESSED IN: 26 plant structures; EXPRESSED DURING: …
Potri.002G025500.v4.1		1.92389	0.969781	1.57999e-09	3.51162e-09	1.78844	0.932563	1.12527e-08	2.21894e-08	2.41383	1.41362	2.00641e-17	4.90588e-17	2.03036	1.11234	6.7016e-12	1.39907e-11	2.67987	1.67236	2.07021e-23	5.87496e-23	YES	YES	YES	YES	YES	0.73	0.75	3.65	2.37	2.72	2.95	4.45	4.56	3.11	3.53	5.83	4.97	AT4G31500.1	cytochrome P450, family 83, subfamily B, polypeptide 1	Encodes an oxime-metabolizing enzyme in the biosynthetic pathway of glucosinolates. Is required for phytochrome signal transduction in red light. Mutation confers auxin overproduction.	cytochrome P450, family 83, subfamily B, polypeptide 1 (CYP83B1); FUNCTIONS IN: oxidoreductase activity, acting on paired donors, with incorporation or reduction of molecular oxygen, NADH or NADPH as one donor, and incorporation of one atom of oxygen, oxygen binding; INVOLVED IN: in 9 processes; LOCATED IN: mitochondrion, endoplasmic reticulum, plasma membrane, membrane; EXPRESSED IN: 24 plant st…
Potri.002G025800.v4.1		2.78414	2.19379	1.05748e-35	5.54976e-35	2.0327	1.66102	2.10881e-16	5.73621e-16	3.11455	2.55415	9.87358e-53	4.9916e-52	2.51821	2.04713	1.53712e-28	5.13966e-28	3.58524	3.02273	1.57614e-83	1.11191e-82	YES	YES	YES	YES	YES	0.83	1.15	6.79	7.69	4.17	4.65	9.03	10.28	5.67	6.59	13.61	12.98	AT4G31500.1	cytochrome P450, family 83, subfamily B, polypeptide 1	Encodes an oxime-metabolizing enzyme in the biosynthetic pathway of glucosinolates. Is required for phytochrome signal transduction in red light. Mutation confers auxin overproduction.	cytochrome P450, family 83, subfamily B, polypeptide 1 (CYP83B1); FUNCTIONS IN: oxidoreductase activity, acting on paired donors, with incorporation or reduction of molecular oxygen, NADH or NADPH as one donor, and incorporation of one atom of oxygen, oxygen binding; INVOLVED IN: in 9 processes; LOCATED IN: mitochondrion, endoplasmic reticulum, plasma membrane, membrane; EXPRESSED IN: 24 plant st…
Potri.002G026300.v4.1		3.38801	1.25727	2.31115e-24	9.03114e-24	3.63907	1.57478	1.9806e-32	8.46064e-32	4.54861	2.39092	4.60315e-68	2.85042e-67	3.95006	1.84337	1.27386e-42	5.59032e-42	4.45301	2.34903	2.1002e-63	1.17793e-62	YES	YES	YES	YES	YES	0.32	0.44	3.77	4.17	4.91	4.83	9.54	9.28	5.9	6.04	8.96	8.6	AT4G31500.1	cytochrome P450, family 83, subfamily B, polypeptide 1	Encodes an oxime-metabolizing enzyme in the biosynthetic pathway of glucosinolates. Is required for phytochrome signal transduction in red light. Mutation confers auxin overproduction.	cytochrome P450, family 83, subfamily B, polypeptide 1 (CYP83B1); FUNCTIONS IN: oxidoreductase activity, acting on paired donors, with incorporation or reduction of molecular oxygen, NADH or NADPH as one donor, and incorporation of one atom of oxygen, oxygen binding; INVOLVED IN: in 9 processes; LOCATED IN: mitochondrion, endoplasmic reticulum, plasma membrane, membrane; EXPRESSED IN: 24 plant st…
Potri.002G026500.v4.1		2.16473	1.69491	1.05672e-17	3.34369e-17	1.76624	1.45679	1.38593e-11	3.13593e-11	2.43969	1.98104	8.04349e-26	2.46593e-25	2.07372	1.68831	4.21756e-17	1.05621e-16	3.20167	2.67791	3.24901e-58	1.71659e-57	YES	YES	YES	YES	YES	1.25	0.79	5.47	3.95	3.63	3.83	5.8	6.41	4.04	5.04	10.47	10.05	AT4G31500.1	cytochrome P450, family 83, subfamily B, polypeptide 1	Encodes an oxime-metabolizing enzyme in the biosynthetic pathway of glucosinolates. Is required for phytochrome signal transduction in red light. Mutation confers auxin overproduction.	cytochrome P450, family 83, subfamily B, polypeptide 1 (CYP83B1); FUNCTIONS IN: oxidoreductase activity, acting on paired donors, with incorporation or reduction of molecular oxygen, NADH or NADPH as one donor, and incorporation of one atom of oxygen, oxygen binding; INVOLVED IN: in 9 processes; LOCATED IN: mitochondrion, endoplasmic reticulum, plasma membrane, membrane; EXPRESSED IN: 24 plant st…
Potri.002G045000.v4.1		-1.15995	1.42956	6.73612e-06	1.21257e-05	-1.19492	1.39536	2.51481e-06	4.34999e-06	-2.10901	1.23711	4.86755e-13	1.04031e-12	-1.28904	1.40008	3.45183e-07	5.83849e-07	-2.23338	1.2077	3.2743e-14	7.183e-14	YES	YES	YES	YES	YES	8.15	3.98	3.16	2.36	2.75	2.86	1.77	1.26	2.94	2.2	1.32	1.47	AT5G43700.1	AUX/IAA transcriptional regulator family protein	Auxin inducible protein similar to transcription factors.	AUXIN INDUCIBLE 2-11 (ATAUX2-11); CONTAINS InterPro DOMAIN/s: Aux/IAA-ARF-dimerisation (InterPro:IPR011525), AUX/IAA protein (InterPro:IPR003311); BEST Arabidopsis thaliana protein match is: AUX/IAA transcriptional regulator family protein (TAIR:AT1G04240.1); Has 1807 Blast hits to 1807 proteins in 277 species: Archae - 0; Bacteria - 0; Metazoa - 736; Fungi - 347; Plants - 385; Viruses - 0; Other…
Potri.002G186400.v4.1		-1.10188	3.43311	3.7529e-17	1.16208e-16	-1.59531	3.2715	1.65475e-32	7.08042e-32	-3.11661	3.07876	3.8776e-73	2.5567e-72	-4.1368	2.97097	9.8005e-94	8.36951e-93	-4.47234	2.97118	2.23317e-103	1.90884e-102	YES	YES	YES	YES	YES	39.18	41.99	20.72	18.08	12.35	16.23	4.35	5.83	2.2	2.63	1.52	2.45	AT3G62100.1	indole-3-acetic acid inducible 30	Encodes a member of the Aux/IAA family of proteins implicated in auxin signaling. IAA30 lacks the conserved degron (domain II) found in many family members. IAA30 transcripts are induced by auxin treatment and accumulate preferentially in the quiescent center cells of the root meristem. Overexpression of IAA30 leads to defects in gravitropism, root development, root meristem maintenance, and coty…	indole-3-acetic acid inducible 30 (IAA30); FUNCTIONS IN: sequence-specific DNA binding transcription factor activity; INVOLVED IN: gravitropism, response to auxin stimulus, response to cyclopentenone, somatic embryogenesis, root development; LOCATED IN: nucleus, chloroplast; EXPRESSED IN: 16 plant structures; EXPRESSED DURING: 6 growth stages; CONTAINS InterPro DOMAIN/s: Aux/IAA-ARF-dimerisation …
Potri.003G176700.v4.1		6.22704	2.40977	4.25526e-83	4.78827e-82	4.55597	0.932271	1.05383e-25	3.81102e-25	5.69447	1.97586	1.54815e-59	8.58708e-59	5.12174	1.44291	9.62557e-40	4.01614e-39	4.3944	0.8144	2.09913e-22	5.81795e-22	YES	YES	YES	YES	YES	0.2	0.05	10.55	9.03	3.56	2.82	7.31	7.12	4.77	4.56	2.76	3.05	AT5G13930.1	Chalcone and stilbene synthase family protein	Encodes chalcone synthase (CHS), a key enzyme involved in the biosynthesis of flavonoids. Required for the accumulation of purple anthocyanins in leaves and stems. Also involved in the regulation of auxin transport and the modulation of root gravitropism.	TRANSPARENT TESTA 4 (TT4); FUNCTIONS IN: naringenin-chalcone synthase activity; INVOLVED IN: in 11 processes; LOCATED IN: plant-type vacuole membrane, endoplasmic reticulum, nucleus; EXPRESSED IN: 22 plant structures; EXPRESSED DURING: 14 growth stages; CONTAINS InterPro DOMAIN/s: Chalcone/stilbene synthase, N-terminal (InterPro:IPR001099), Thiolase-like (InterPro:IPR016039), Polyketide synthase,…
Potri.003G176800.v4.1		4.99122	5.27071	0	0	5.84648	6.18366	0	0	6.48482	6.80708	0	0	6.39515	6.71737	0	0	6.24542	6.60828	0	0	YES	YES	YES	YES	YES	2.81	1.96	75.88	80.89	147.16	145.63	231.1	237.26	213.42	209.78	195.69	199.17	AT5G13930.1	Chalcone and stilbene synthase family protein	Encodes chalcone synthase (CHS), a key enzyme involved in the biosynthesis of flavonoids. Required for the accumulation of purple anthocyanins in leaves and stems. Also involved in the regulation of auxin transport and the modulation of root gravitropism.	TRANSPARENT TESTA 4 (TT4); FUNCTIONS IN: naringenin-chalcone synthase activity; INVOLVED IN: in 11 processes; LOCATED IN: plant-type vacuole membrane, endoplasmic reticulum, nucleus; EXPRESSED IN: 22 plant structures; EXPRESSED DURING: 14 growth stages; CONTAINS InterPro DOMAIN/s: Chalcone/stilbene synthase, N-terminal (InterPro:IPR001099), Thiolase-like (InterPro:IPR016039), Polyketide synthase,…
Potri.003G176900.v4.1		5.81747	5.94518	0	0	6.70012	6.88356	0	0	7.28337	7.46351	0	0	7.03078	7.20935	0	0	6.83942	7.05756	0	0	YES	YES	YES	YES	YES	2.08	2.44	136.98	129.96	256.85	252.12	397.68	385.68	313.73	318.93	286.69	287.08	AT5G13930.1	Chalcone and stilbene synthase family protein	Encodes chalcone synthase (CHS), a key enzyme involved in the biosynthesis of flavonoids. Required for the accumulation of purple anthocyanins in leaves and stems. Also involved in the regulation of auxin transport and the modulation of root gravitropism.	TRANSPARENT TESTA 4 (TT4); FUNCTIONS IN: naringenin-chalcone synthase activity; INVOLVED IN: in 11 processes; LOCATED IN: plant-type vacuole membrane, endoplasmic reticulum, nucleus; EXPRESSED IN: 22 plant structures; EXPRESSED DURING: 14 growth stages; CONTAINS InterPro DOMAIN/s: Chalcone/stilbene synthase, N-terminal (InterPro:IPR001099), Thiolase-like (InterPro:IPR016039), Polyketide synthase,…
Potri.005G098200.v4.1	NAC	4.87263	2.05601	1.92627e-57	1.51272e-56	5.09833	2.3737	8.0054e-73	6.65298e-72	4.96374	2.22414	8.77252e-65	5.20239e-64	4.74023	2.02244	1.43307e-54	7.6278e-54	6.10752	3.3729	5.40358e-157	6.90308e-156	YES	YES	YES	YES	YES	0.57	0.23	12.24	12.34	15.88	13.8	15.62	12.06	12.73	10.04	30.82	30.62	AT1G56010.2	NAC domain containing protein 1	Encodes a transcription factor involved in shoot apical meristem formation and auxin-mediated lateral root formation. The gene is thought not to be involved in stress responses (NaCl, auxins, ethylene). NAC1 (NAC1)	NAC domain containing protein 1 (NAC1); CONTAINS InterPro DOMAIN/s: No apical meristem (NAM) protein (InterPro:IPR003441); BEST Arabidopsis thaliana protein match is: NAC (No Apical Meristem) domain transcriptional regulator superfamily protein (TAIR:AT3G12977.1); Has 2928 Blast hits to 2921 proteins in 75 species: Archae - 0; Bacteria - 0; Metazoa - 0; Fungi - 0; Plants - 2928; Viruses - 0; Othe…
Potri.005G153200.v4.1		-1.34732	5.56563	6.89563e-100	9.30849e-99	-1.25372	5.58242	1.28473e-94	1.37176e-93	-1.26592	5.62375	1.65697e-96	1.38566e-95	-1.48057	5.54527	1.65518e-115	1.74818e-114	-1.45031	5.57691	1.93681e-126	1.9898e-125	YES	YES	YES	YES	YES	69.47	66.27	29.08	26.16	30.75	30.32	30.88	31.34	26.36	25.15	27.16	27.36	AT1G09700.1	dsRNA-binding domain-like superfamily protein	Encodes a nuclear dsRNA binding protein. Involved in mRNA cleavage. The mutant is characterized by shorter stature, delayed flowering, leaf hyponasty, reduced fertility, decreased rate of root growth, and an altered root gravitropic response. It also exhibits less sensitivity to auxin and cytokinin.	HYPONASTIC LEAVES 1 (HYL1); CONTAINS InterPro DOMAIN/s: Double-stranded RNA-binding (InterPro:IPR001159), Double-stranded RNA-binding-like (InterPro:IPR014720); BEST Arabidopsis thaliana protein match is: dsRNA-binding protein 2 (TAIR:AT2G28380.1); Has 992 Blast hits to 893 proteins in 320 species: Archae - 14; Bacteria - 506; Metazoa - 117; Fungi - 6; Plants - 270; Viruses - 0; Other Eukaryotes …
Potri.006G081600.v4.1		2.00955	1.96051	3.63419e-19	1.21028e-18	2.00488	2.03191	1.1913e-20	3.75085e-20	2.40319	2.34418	1.82299e-32	6.4506e-32	1.97446	2.00364	1.95779e-19	5.27233e-19	1.47566	1.66603	8.81002e-10	1.63849e-09	YES	YES	YES	YES	YES	0.76	1.05	3.57	4.1	4.01	3.87	4.94	5.77	3.8	3.84	2.54	3.01	AT4G07400.1	VIER F-box proteine 3	Encodes an F-box protein. Based on genetic analysis appears to be functionally redundant with VFB1,2,and 4. When levels of all 4 genes are reduced plants show defects in growth and reduced levels of auxin response genes.	VIER F-box proteine 3 (VFB3); CONTAINS InterPro DOMAIN/s: F-box domain, cyclin-like (InterPro:IPR001810), F-box domain, Skp2-like (InterPro:IPR022364); BEST Arabidopsis thaliana protein match is: VIER F-box proteine 1 (TAIR:AT1G47056.1); Has 30201 Blast hits to 17322 proteins in 780 species: Archae - 12; Bacteria - 1396; Metazoa - 17338; Fungi - 3422; Plants - 5037; Viruses - 0; Other Eukaryotes …
Potri.006G085900.v4.1	MYB	1.76461	2.28637	3.92379e-19	1.30557e-18	2.07462	2.59905	2.48043e-31	1.03033e-30	2.97848	3.35011	4.37087e-84	3.23762e-83	2.3624	2.82666	1.03578e-42	4.55398e-42	1.9446	2.52805	2.94433e-26	8.95104e-26	YES	YES	YES	YES	YES	0.88	1.51	4.38	4.16	5.42	5.53	10.71	10.41	6.25	7.01	4.9	5.28	AT2G37630.1	myb-like HTH transcriptional regulator family protein	Encodes a MYB-domain protein involved in specification of the leaf proximodistal axis. Mutation results in lobed and dissected leaves with a characteristic asymmetry. Homologous to the Antirrhinum PHANTASTICA (PHAN) and maize ROUGH SHEATH2 (RS2) genes Asymmetric placement of auxin response at the distal leaf tip precedes visible asymmetric leaf growth. Acts alongside AXR1 to exclude BP expression…	ASYMMETRIC LEAVES 1 (AS1); CONTAINS InterPro DOMAIN/s: SANT, DNA-binding (InterPro:IPR001005), Homeodomain-like (InterPro:IPR009057), Myb, DNA-binding (InterPro:IPR014778), HTH transcriptional regulator, Myb-type, DNA-binding (InterPro:IPR017930), Homeodomain-related (InterPro:IPR012287), Myb transcription factor (InterPro:IPR015495); BEST Arabidopsis thaliana protein match is: myb domain protein…
Potri.006G123900.v4.1		1.58905	7.0163	4.55315e-290	2.08135e-288	1.53748	7.01677	8.31621e-285	2.81294e-283	2.1493	7.50927	0	0	1.51982	7.01157	2.42459e-255	6.0687e-254	1.74204	7.21284	0	0	YES	YES	YES	YES	YES	17.11	16.26	53.31	51.23	52.96	51.29	81.25	82.98	51.16	50.74	61.41	60.59	AT2G36910.1	ATP binding cassette subfamily B1	Belongs to the family of ATP-binding cassette (ABC) transporters. Also known as AtMDR1.Possibly regulates auxin-dependent responses by influencing basipetal auxin transport in the root. Exerts nonredundant, partially overlapping functions with the ABC transporter encoded by AT3G28860. PGP1 mediates cellular efflux of IAA and interacts with PIN genes that may confer an accelerated vectoral compone…	ATP binding cassette subfamily B1 (ABCB1); FUNCTIONS IN: ATPase activity, coupled to transmembrane movement of substances, calmodulin binding, auxin efflux transmembrane transporter activity; INVOLVED IN: in 10 processes; LOCATED IN: plasma membrane; EXPRESSED IN: 26 plant structures; EXPRESSED DURING: 13 growth stages; CONTAINS InterPro DOMAIN/s: ATPase, AAA+ type, core (InterPro:IPR003593), ABC…
Potri.006G264300.v4.1		1.54287	2.30285	1.55991e-15	4.5523e-15	1.90695	2.64513	2.1525e-28	8.3512e-28	2.22888	2.89457	1.22077e-41	5.17654e-41	1.69576	2.47861	1.03135e-20	2.86456e-20	2.26236	2.96536	3.4673e-44	1.48646e-43	YES	YES	YES	YES	YES	1.24	1.19	3.69	3.69	4.73	5.08	5.88	6.78	4.08	4.32	5.37	7.35	AT4G31820.1	Phototropic-responsive NPH3 family protein	A member of the NPY family genes (NPY1/AT4G31820, NPY2/AT2G14820, NPY3/AT5G67440, NPY4/AT2G23050, NPY5/AT4G37590). Encodes a protein with similarity to NHP3. Contains BTB/POZ domain. Promoter region has canonical auxin response element binding site and Wus binding site. Co-localizes to the late endosome with PID. Regulates cotyledon development through control of PIN1 polarity in concert with PID…	ENHANCER OF PINOID (ENP); FUNCTIONS IN: signal transducer activity; INVOLVED IN: in 8 processes; LOCATED IN: late endosome, plasma membrane; EXPRESSED IN: 31 plant structures; EXPRESSED DURING: 14 growth stages; CONTAINS InterPro DOMAIN/s: NPH3 (InterPro:IPR004249), BTB/POZ (InterPro:IPR013069), BTB/POZ fold (InterPro:IPR011333), BTB/POZ-like (InterPro:IPR000210); BEST Arabidopsis thaliana protei…
Potri.007G065400.v4.1	NAC	1.08453	1.50992	1.16113e-05	2.05722e-05	1.47611	1.83503	2.68776e-11	5.9984e-11	2.02743	2.2498	9.65352e-24	2.80278e-23	1.78612	2.0656	2.10414e-17	5.32089e-17	2.33003	2.53463	1.9396e-34	6.98411e-34	YES	YES	YES	YES	YES	2.08	2.64	4.98	5.49	6.51	7.65	10.91	10.41	9.42	7.88	11.55	14.69	AT1G56010.2	NAC domain containing protein 1	Encodes a transcription factor involved in shoot apical meristem formation and auxin-mediated lateral root formation. The gene is thought not to be involved in stress responses (NaCl, auxins, ethylene). NAC1 (NAC1)	NAC domain containing protein 1 (NAC1); CONTAINS InterPro DOMAIN/s: No apical meristem (NAM) protein (InterPro:IPR003441); BEST Arabidopsis thaliana protein match is: NAC (No Apical Meristem) domain transcriptional regulator superfamily protein (TAIR:AT3G12977.1); Has 2928 Blast hits to 2921 proteins in 75 species: Archae - 0; Bacteria - 0; Metazoa - 0; Fungi - 0; Plants - 2928; Viruses - 0; Othe…
Potri.008G098850.v4.1		2.45359	3.86302	6.03232e-87	7.14165e-86	2.47442	3.95947	2.97551e-96	3.22462e-95	2.16328	3.69325	1.97485e-66	1.19941e-65	2.47265	3.95133	1.35769e-94	1.17264e-93	3.26392	4.68246	2.84262e-228	5.34977e-227	YES	YES	YES	YES	YES	1.48	1.22	7.53	7.92	8.36	7.83	6.49	6.96	7.89	8.11	14.11	14.3	AT3G53480.1	pleiotropic drug resistance 9	Negative regulator of auxin polar transport inhibitors. ABCG37 regulates auxin distribution and homeostasis in roots by excluding IBA from the root apex, but does not act directly in basipetal transport. ABCG37 and ABCG36 act redundantly at outermost root plasma membranes and, transport IBA out of the cells.	pleiotropic drug resistance 9 (PDR9); FUNCTIONS IN: ATPase activity, coupled to transmembrane movement of substances, transporter activity; INVOLVED IN: cellular response to indolebutyric acid stimulus, drug transmembrane transport, root development, auxin polar transport; LOCATED IN: plasma membrane; EXPRESSED IN: 7 plant structures; EXPRESSED DURING: 4 anthesis; CONTAINS InterPro DOMAIN/s: ATPa…
Potri.008G151800.v4.1		2.31116	3.50728	7.82564e-63	6.67383e-62	2.59822	3.82658	6.82632e-95	7.31234e-94	2.14508	3.44002	2.18561e-55	1.15066e-54	2.03402	3.35267	7.62098e-48	3.65649e-47	1.47993	2.96355	1.56362e-22	4.345e-22	YES	YES	YES	YES	YES	4.51	4.65	25.36	21.77	28.46	31.11	22.91	21.76	20.57	19.2	13.47	14.63	AT5G19530.1	S-adenosyl-L-methionine-dependent methyltransferases superfamily protein	Encodes a spermine synthase. Required for internode elongation and vascular development, specifically in the mechanism that defines the boundaries between veins and nonvein regions. This mechanism may be mediated by polar auxin transport. Though ACL5 has been shown to function as a spermine synthase in E. coli, an ACL5 knockout has no effect on the endogenous levels of free and conjugated polyami…	ACAULIS 5 (ACL5); CONTAINS InterPro DOMAIN/s: Spermine synthase (InterPro:IPR001045); BEST Arabidopsis thaliana protein match is: spermidine synthase 1 (TAIR:AT1G23820.1); Has 30201 Blast hits to 17322 proteins in 780 species: Archae - 12; Bacteria - 1396; Metazoa - 17338; Fungi - 3422; Plants - 5037; Viruses - 0; Other Eukaryotes - 2996 (source: NCBI BLink).
Potri.008G161200.v4.1		2.24875	2.12618	3.06731e-25	1.22579e-24	4.19298	3.9361	1.14842e-176	2.28403e-175	4.418	4.12944	1.62747e-214	2.94619e-213	5.5411	5.2176	0	0	4.75003	4.49336	1.08599e-290	2.64258e-289	YES	YES	YES	YES	YES	2.38	1.55	9.38	9.89	40.19	36.56	45.81	46.24	96.81	96.14	57.16	58.66	AT4G14550.1	indole-3-acetic acid inducible 14	IAA14 is a member of the Aux/IAA protein family. Involved in lateral root development. Gain of function mutation decreases auxin-inducible gene expression. Protein is localized to the nucleus. Expressed in stele and root tip epidermis. Functions as a negative regulator of ARF7/19.	indole-3-acetic acid inducible 14 (IAA14); CONTAINS InterPro DOMAIN/s: Aux/IAA-ARF-dimerisation (InterPro:IPR011525), AUX/IAA protein (InterPro:IPR003311); BEST Arabidopsis thaliana protein match is: indole-3-acetic acid 7 (TAIR:AT3G23050.1); Has 30201 Blast hits to 17322 proteins in 780 species: Archae - 12; Bacteria - 1396; Metazoa - 17338; Fungi - 3422; Plants - 5037; Viruses - 0; Other Eukary…
Potri.009G070800.v4.1	SRS	2.11301	4.37919	1.51488e-95	1.95438e-94	2.92631	5.1412	1.70603e-265	5.29876e-264	3.54139	5.68857	0	0	3.8044	5.93255	0	0	3.28864	5.49765	0	0	YES	YES	YES	YES	YES	3.31	3.2	14.3	15.07	26.29	26.96	42.39	41.64	48.52	48.34	34.61	35.03	AT5G12330.2	Lateral root primordium (LRP) protein-related	A member of SHI gene family. Arabidopsis thaliana has ten members that encode proteins with a RING finger-like zinc finger motif. Despite being highly divergent in sequence, many of the SHI-related genes are partially redundant in function and synergistically promote gynoecium, stamen and leaf development in Arabidopsis. Expressed in lateral root primordia and induced by auxin. SWP1 is involved i…	LATERAL ROOT PRIMORDIUM 1 (LRP1); FUNCTIONS IN: protein homodimerization activity; INVOLVED IN: response to auxin stimulus, root development; LOCATED IN: cellular_component unknown; EXPRESSED IN: 15 plant structures; EXPRESSED DURING: 7 growth stages; CONTAINS InterPro DOMAIN/s: Lateral Root Primordium type 1, C-terminal (InterPro:IPR006511), Zinc finger, Lateral Root Primordium type 1 (InterPro:…
Potri.010G089200.v4.1		2.1402	3.55462	1.19395e-57	9.41854e-57	3.40725	4.72954	6.00131e-245	1.70614e-243	2.98006	4.33523	1.26619e-160	1.71217e-159	2.57312	3.98533	1.73138e-102	1.61694e-101	2.28115	3.77703	3.2044e-78	2.13257e-77	YES	YES	YES	YES	YES	4.89	5.11	22.95	22.89	58.72	55.37	47.03	39.96	33.42	29.66	26.35	27.17	AT5G19530.1	S-adenosyl-L-methionine-dependent methyltransferases superfamily protein	Encodes a spermine synthase. Required for internode elongation and vascular development, specifically in the mechanism that defines the boundaries between veins and nonvein regions. This mechanism may be mediated by polar auxin transport. Though ACL5 has been shown to function as a spermine synthase in E. coli, an ACL5 knockout has no effect on the endogenous levels of free and conjugated polyami…	ACAULIS 5 (ACL5); CONTAINS InterPro DOMAIN/s: Spermine synthase (InterPro:IPR001045); BEST Arabidopsis thaliana protein match is: spermidine synthase 1 (TAIR:AT1G23820.1); Has 30201 Blast hits to 17322 proteins in 780 species: Archae - 12; Bacteria - 1396; Metazoa - 17338; Fungi - 3422; Plants - 5037; Viruses - 0; Other Eukaryotes - 2996 (source: NCBI BLink).
Potri.010G191000.v4.1		-1.90124	8.62574	0	0	-2.83229	8.47798	0	0	-3.17108	8.47776	0	0	-3.26387	8.45318	0	0	-2.90746	8.51634	0	0	YES	YES	YES	YES	YES	164.67	162.13	45.33	45.88	24.86	24.54	21.09	19.13	19.03	17.15	22.58	24.96	AT2G38120.1	Transmembrane amino acid transporter family protein	Encodes an auxin influx transporter. AUX1 resides at the apical plasma membrane of protophloem cells and at highly dynamic subpopulations of Golgi apparatus and endosomes in all cell types. AUX1 action in the lateral root cap and/or epidermal cells influences lateral root initiation and positioning.	AUXIN RESISTANT 1 (AUX1); CONTAINS InterPro DOMAIN/s: Amino acid transporter, transmembrane (InterPro:IPR013057); BEST Arabidopsis thaliana protein match is: like AUXIN RESISTANT 1 (TAIR:AT5G01240.1); Has 1256 Blast hits to 1251 proteins in 143 species: Archae - 0; Bacteria - 0; Metazoa - 116; Fungi - 283; Plants - 825; Viruses - 0; Other Eukaryotes - 32 (source: NCBI BLink).
Potri.011G042400.v4.1		1.47463	2.17952	2.67707e-13	7.12015e-13	1.48473	2.24601	1.23838e-14	3.17017e-14	1.95772	2.60139	5.14065e-28	1.65353e-27	2.21911	2.81272	3.05622e-38	1.2428e-37	2.12647	2.77394	1.07457e-35	3.96591e-35	YES	YES	YES	YES	YES	1.18	0.84	3.27	2.52	3.09	2.96	4.07	4.59	5.06	4.89	4.88	4.72	AT3G62980.1	F-box/RNI-like superfamily protein	Encodes an auxin receptor that mediates auxin-regulated transcription. It contains leucine-rich repeats and an F-box and interacts with ASK1, ASK2 and AtCUL1 to form SCF-TIR1, an SCF ubiquitin ligase complex. Related to yeast Grr1p and human SKP2 proteins, involved in ubiquitin-mediated processes. Required for normal response to auxin and repressed in response to flagellin. As part of the SCF com…	TRANSPORT INHIBITOR RESPONSE 1 (TIR1); CONTAINS InterPro DOMAIN/s: F-box domain, cyclin-like (InterPro:IPR001810), F-box domain, Skp2-like (InterPro:IPR022364); BEST Arabidopsis thaliana protein match is: GRR1-like protein 1 (TAIR:AT4G03190.1); Has 30201 Blast hits to 17322 proteins in 780 species: Archae - 12; Bacteria - 1396; Metazoa - 17338; Fungi - 3422; Plants - 5037; Viruses - 0; Other Euka…
Potri.011G113000.v4.1		-2.72423	0.321212	1.48129e-10	3.46301e-10	-2.92801	0.235769	4.24756e-12	9.83865e-12	-4.99061	0.193546	4.56673e-17	1.10404e-16	-5.03776	0.157406	1.93082e-17	4.88839e-17	-5.06286	0.172587	1.89454e-17	4.6048e-17	YES	YES	YES	YES	YES	2.98	3.1	0.71	0.2	0.6	0.25	0.09	0.1	0.17	0	0.09	0.09	AT1G78380.1	glutathione S-transferase TAU 19	Encodes a glutathione transferase that is a member of Tau GST gene family. Expression is induced by drought stress, oxidative stress, and high doses of auxin and cytokinin. naming convention according to Wagner et al. (2002) The expression of this gene is upregulated by herbicide safeners such as benoxacor and fenclorim.	glutathione S-transferase TAU 19 (GSTU19); FUNCTIONS IN: glutathione transferase activity, glutathione binding; INVOLVED IN: response to oxidative stress, response to cadmium ion, response to cyclopentenone, toxin catabolic process, cellular response to water deprivation; LOCATED IN: chloroplast, plasma membrane, chloroplast stroma, cytoplasm; EXPRESSED IN: 26 plant structures; EXPRESSED DURING: …
Potri.011G140800.v4.1		1.68176	7.15337	0	0	1.42443	6.99989	9.52132e-247	2.73031e-245	1.77397	7.27792	0	0	1.59782	7.1366	1.63035e-294	4.87306e-293	2.23754	7.67511	0	0	YES	YES	YES	YES	YES	108.76	104.15	348.45	358.84	303.92	307.65	398.39	400.37	342.4	338.46	547.99	557.56	AT1G78380.1	glutathione S-transferase TAU 19	Encodes a glutathione transferase that is a member of Tau GST gene family. Expression is induced by drought stress, oxidative stress, and high doses of auxin and cytokinin. naming convention according to Wagner et al. (2002) The expression of this gene is upregulated by herbicide safeners such as benoxacor and fenclorim.	glutathione S-transferase TAU 19 (GSTU19); FUNCTIONS IN: glutathione transferase activity, glutathione binding; INVOLVED IN: response to oxidative stress, response to cadmium ion, response to cyclopentenone, toxin catabolic process, cellular response to water deprivation; LOCATED IN: chloroplast, plasma membrane, chloroplast stroma, cytoplasm; EXPRESSED IN: 26 plant structures; EXPRESSED DURING: …
Potri.012G093800.v4.1		1.48972	3.5001	1.09104e-30	5.07002e-30	1.64243	3.67653	1.79725e-42	9.37047e-42	1.80759	3.80228	8.27328e-54	4.24957e-53	1.60901	3.65124	1.13317e-39	4.72299e-39	1.4678	3.58026	1.49209e-33	5.29564e-33	YES	YES	YES	YES	YES	10.55	10.01	27.95	31.94	35.18	33.51	40.19	38.66	34.92	31.17	32.46	30.31	AT5G63310.1	nucleoside diphosphate kinase 2	Maintains intracellular dNTP levels except ATP. Plays a role in response to oxidative stress and UV. Involved in phytochrome-mediated light signaling. Participates in auxin-regulated processes, partly through the modulation of auxin transport. H-bonding with His-197 inside the nucleotide-binding pocket is critical for NDPK2 functioning.	nucleoside diphosphate kinase 2 (NDPK2); FUNCTIONS IN: nucleoside diphosphate kinase activity, protein binding, ATP binding; INVOLVED IN: response to UV, auxin mediated signaling pathway, response to hydrogen peroxide, red, far-red light phototransduction; LOCATED IN: in 6 components; EXPRESSED IN: 25 plant structures; EXPRESSED DURING: 14 growth stages; CONTAINS InterPro DOMAIN/s: Nucleoside dip…
Potri.013G009400.v4.1		1.0673	4.81521	5.02158e-39	2.83794e-38	1.0157	4.82575	2.00912e-38	9.71034e-38	1.1436	4.92334	3.71255e-49	1.78e-48	1.85607	5.44452	3.77106e-150	5.25561e-149	1.40157	5.1353	1.92281e-83	1.35444e-82	YES	YES	YES	YES	YES	8.88	8.68	18.85	19.48	19.54	18.65	20.22	22.8	34.16	33.45	26.37	24.47	AT1G15690.1	Inorganic H pyrophosphatase family protein	Encodes a H(+)-translocating (pyrophosphate-energized) inorganic pyrophosphatase (H(+)-PPase; EC 3.6.1.1) located in the vacuolar membrane. Expression is found in all tissues examined, including meristems and floral organ primordium. Expression is particularly enhanced in pollen, and is repressed by light. Over expression and loss of function phenotypes suggest AVP1 is involved in regulation of a…	AVP1; FUNCTIONS IN: hydrogen-translocating pyrophosphatase activity; INVOLVED IN: response to water deprivation, response to salt stress, establishment or maintenance of transmembrane electrochemical gradient, leaf development, auxin polar transport; LOCATED IN: in 10 components; EXPRESSED IN: 28 plant structures; EXPRESSED DURING: 16 growth stages; CONTAINS InterPro DOMAIN/s: Inorganic H+ pyroph…
Potri.013G113100.v4.1	NAC	2.71203	2.87989	1.07e-53	7.93907e-53	3.59329	3.75404	6.42819e-136	9.67779e-135	3.58656	3.73003	8.34163e-135	9.37812e-134	3.87524	4.00264	2.80911e-171	4.49782e-170	2.80292	3.07332	1.28768e-64	7.32531e-64	YES	YES	YES	YES	YES	1.57	2.65	13.91	15.16	28.28	27.01	27.84	28.7	33.01	33.43	17.67	15.12	AT1G71930.1	vascular related NAC-domain protein 7	Encodes a NAC-domain transcription factor with transcriptional activation activity that is involved in xylem formation. Induces transdifferentiation of various cells into protoxylem vessel elements. Located in the nucleus. Expression induced in the presence of auxin, cytokinin and brassinosteroids.	vascular related NAC-domain protein 7 (VND7); CONTAINS InterPro DOMAIN/s: No apical meristem (NAM) protein (InterPro:IPR003441); BEST Arabidopsis thaliana protein match is: vascular related NAC-domain protein 1 (TAIR:AT2G18060.1); Has 3020 Blast hits to 3015 proteins in 84 species: Archae - 0; Bacteria - 0; Metazoa - 2; Fungi - 0; Plants - 3006; Viruses - 0; Other Eukaryotes - 12 (source: NCBI BL…
Potri.014G145100.v4.1		3.9912	7.64335	0	0	4.15284	7.84076	0	0	4.94695	8.61391	0	0	4.54191	8.2166	0	0	4.7735	8.47241	0	0	YES	YES	YES	YES	YES	22.55	20.87	366.99	349.53	417.92	410.65	742.25	734.56	536.82	535.88	652.2	650.09	AT5G13930.1	Chalcone and stilbene synthase family protein	Encodes chalcone synthase (CHS), a key enzyme involved in the biosynthesis of flavonoids. Required for the accumulation of purple anthocyanins in leaves and stems. Also involved in the regulation of auxin transport and the modulation of root gravitropism.	TRANSPARENT TESTA 4 (TT4); FUNCTIONS IN: naringenin-chalcone synthase activity; INVOLVED IN: in 11 processes; LOCATED IN: plant-type vacuole membrane, endoplasmic reticulum, nucleus; EXPRESSED IN: 22 plant structures; EXPRESSED DURING: 14 growth stages; CONTAINS InterPro DOMAIN/s: Chalcone/stilbene synthase, N-terminal (InterPro:IPR001099), Thiolase-like (InterPro:IPR016039), Polyketide synthase,…
Potri.018G092300.v4.1		-1.29321	1.01917	2.09498e-05	3.63576e-05	-2.21937	0.777375	2.87368e-11	6.40469e-11	-1.41065	1.01589	2.42858e-06	3.90344e-06	-1.05836	1.09436	0.000136088	0.000200367	-1.78634	0.923574	8.04067e-09	1.43653e-08	YES	YES	YES	YES	YES	3.22	3.99	1.59	1.45	0.66	0.99	1.25	1.75	1.84	1.82	1.44	0.87	AT5G57420.1	indole-3-acetic acid inducible 33	Belongs to auxin inducible gene family.	indole-3-acetic acid inducible 33 (IAA33); FUNCTIONS IN: sequence-specific DNA binding transcription factor activity; INVOLVED IN: response to auxin stimulus; LOCATED IN: nucleus; EXPRESSED IN: 11 plant structures; EXPRESSED DURING: 4 anthesis, F mature embryo stage, petal differentiation and expansion stage, E expanded cotyledon stage, D bilateral stage; CONTAINS InterPro DOMAIN/s: Aux/IAA-ARF-d…
Potri.018G105500.v4.1		1.72645	3.83423	7.55339e-49	5.17976e-48	1.89323	4.02847	6.4768e-67	4.99227e-66	2.61992	4.62253	8.28979e-162	1.12617e-160	2.582	4.59221	1.79829e-150	2.51964e-149	2.13437	4.25599	5.67948e-97	4.60351e-96	YES	YES	YES	YES	YES	6.3	7.77	25.89	22.49	29.55	26.74	47.05	48.67	45.37	44.25	33.59	34.49	AT5G48930.1	hydroxycinnamoyl-CoA shikimate/quinate hydroxycinnamoyl transferase	At5g48930 has been shown to encode for the hydroxycinnamoyl-Coenzyme A shikimate/quinate hydroxycinnamoyltransferase (HCT) both synthesizing and catabolizing the hydroxycinnamoylesters (coumaroyl/caffeoyl shikimate and quinate) involved in the phenylpropanoid pathway. Influence on the accumulation of flavonoids which in turn inhibit auxin transport and reduce plant growth.	hydroxycinnamoyl-CoA shikimate/quinate hydroxycinnamoyl transferase (HCT); CONTAINS InterPro DOMAIN/s: Transferase (InterPro:IPR003480); BEST Arabidopsis thaliana protein match is: HXXXD-type acyl-transferase family protein (TAIR:AT5G57840.1); Has 1807 Blast hits to 1807 proteins in 277 species: Archae - 0; Bacteria - 0; Metazoa - 736; Fungi - 347; Plants - 385; Viruses - 0; Other Eukaryotes - 33…
Potri.018G127800.v4.1		-1.12402	6.55082	1.06387e-119	1.76038e-118	-2.57935	6.21741	0	0	-3.01775	6.21556	0	0	-3.23865	6.17064	0	0	-3.00122	6.2161	0	0	YES	YES	YES	YES	YES	162.43	168.2	78.44	78.9	29.23	30.06	22.03	22.9	18.73	18.33	20.97	24.31	AT1G04550.2	AUX/IAA transcriptional regulator family protein	IAA12/BDL plays a role in auxin-mediated processes of apical-basal patterning in the embryo. bdl mutants lack a primary root meristem	indole-3-acetic acid inducible 12 (IAA12); FUNCTIONS IN: transcription repressor activity, sequence-specific DNA binding transcription factor activity; INVOLVED IN: xylem and phloem pattern formation, response to auxin stimulus, embryonic pattern specification, root development; LOCATED IN: nucleus; EXPRESSED IN: 22 plant structures; EXPRESSED DURING: 13 growth stages; CONTAINS InterPro DOMAIN/s:…
Potri.019G061700.v4.1		-1.32473	4.94924	6.27983e-62	5.28217e-61	-2.11973	4.73965	2.07545e-134	3.08654e-133	-2.1663	4.79009	1.69319e-134	1.8972e-133	-2.29876	4.74309	3.67614e-140	4.76785e-139	-1.43186	4.95633	9.38946e-79	6.28442e-78	YES	YES	YES	YES	YES	66.14	65.66	27.51	26.94	14.96	17.47	16.08	16.15	14.14	14.16	24.8	28.84	AT3G10870.1	methyl esterase 17	Encodes a methyl IAA esterase. Methyl IAA is believed to be an inactive form of auxin that needs to be demethylated to exert a biological effect. MES17 does not act on methyl JA, MeSA, MeGA4, or MEGA9 in vitro. This gene is expressed in several tissues of seedlings and adult plants, with a higher relative level of expression in the seedling shoot apex and the adult stem.	methyl esterase 17 (MES17); CONTAINS InterPro DOMAIN/s: Alpha/beta hydrolase fold-1 (InterPro:IPR000073); BEST Arabidopsis thaliana protein match is: methyl esterase 18 (TAIR:AT5G58310.1); Has 1383 Blast hits to 1383 proteins in 290 species: Archae - 0; Bacteria - 591; Metazoa - 1; Fungi - 15; Plants - 599; Viruses - 2; Other Eukaryotes - 175 (source: NCBI BLink).
Potri.019G083600.v4.1	NAC	5.12715	1.59986	9.06927e-44	5.6497e-43	5.87895	2.42338	1.6624e-81	1.53275e-80	5.82979	2.35196	1.53682e-77	1.06521e-76	5.46812	2.00891	2.26088e-59	1.28904e-58	3.91617	0.621941	4.98959e-19	1.26508e-18	YES	YES	YES	YES	YES	0.22	0.1	5.47	6.63	10.19	10.75	11.06	9.75	6.46	9.23	3.05	2.46	AT1G71930.1	vascular related NAC-domain protein 7	Encodes a NAC-domain transcription factor with transcriptional activation activity that is involved in xylem formation. Induces transdifferentiation of various cells into protoxylem vessel elements. Located in the nucleus. Expression induced in the presence of auxin, cytokinin and brassinosteroids.	vascular related NAC-domain protein 7 (VND7); CONTAINS InterPro DOMAIN/s: No apical meristem (NAM) protein (InterPro:IPR003441); BEST Arabidopsis thaliana protein match is: vascular related NAC-domain protein 1 (TAIR:AT2G18060.1); Has 3020 Blast hits to 3015 proteins in 84 species: Archae - 0; Bacteria - 0; Metazoa - 2; Fungi - 0; Plants - 3006; Viruses - 0; Other Eukaryotes - 12 (source: NCBI BL…
Potri.001G186100.v4.1		-2.01513	7.66223	0	0	-1.78961	7.71016	0	0	-2.09608	7.68543	0	0	-2.2342	7.64415	0	0	-1.98063	7.71709	0	0	YES	YES	YES	YES	YES	331.03	333.49	83.64	87.17	101.97	104.27	87.06	84.24	72.27	77.71	92.86	92.1	AT4G29080.1	phytochrome-associated protein 2	phytochrome-associated protein 2 (PAP2)	phytochrome-associated protein 2 (PAP2); FUNCTIONS IN: sequence-specific DNA binding transcription factor activity; INVOLVED IN: response to auxin stimulus, regulation of translation; LOCATED IN: intracellular, nucleus; EXPRESSED IN: 22 plant structures; EXPRESSED DURING: 13 growth stages; CONTAINS InterPro DOMAIN/s: Aux/IAA-ARF-dimerisation (InterPro:IPR011525), AUX/IAA protein (InterPro:IPR0033…
Potri.002G082400.v4.1		-1.28525	6.78623	1.44629e-172	3.51801e-171	-1.4764	6.73056	9.59358e-240	2.68783e-238	-2.16667	6.62029	0	0	-2.70008	6.51693	0	0	-2.89005	6.514	0	0	YES	YES	YES	YES	YES	124.42	122.15	52.15	53.03	47.71	47.46	29.23	31.48	20.03	20.26	17.59	18.83	AT1G44350.1	IAA-leucine resistant (ILR)-like gene 6	encodes a protein similar to IAA amino acid conjugate hydrolase.	IAA-leucine resistant (ILR)-like gene 6 (ILL6); FUNCTIONS IN: metallopeptidase activity, IAA-amino acid conjugate hydrolase activity; INVOLVED IN: proteolysis, regulation of systemic acquired resistance, auxin metabolic process; LOCATED IN: endomembrane system; EXPRESSED IN: 22 plant structures; EXPRESSED DURING: 13 growth stages; CONTAINS InterPro DOMAIN/s: Peptidase M20 (InterPro:IPR002933), Pe…
Potri.003G051300.v4.1		-2.10256	5.4939	1.31076e-192	3.64047e-191	-1.53912	5.59913	3.30937e-142	5.22687e-141	-1.82457	5.57993	9.1753e-170	1.30795e-168	-2.11651	5.49947	6.32068e-194	1.14958e-192	-2.07134	5.52971	4.6852e-212	8.18204e-211	YES	YES	YES	YES	YES	76.63	76.85	18.79	18.27	28.03	28.62	24.84	22.86	18.69	18.83	18.38	21.61	AT4G29080.1	phytochrome-associated protein 2	phytochrome-associated protein 2 (PAP2)	phytochrome-associated protein 2 (PAP2); FUNCTIONS IN: sequence-specific DNA binding transcription factor activity; INVOLVED IN: response to auxin stimulus, regulation of translation; LOCATED IN: intracellular, nucleus; EXPRESSED IN: 22 plant structures; EXPRESSED DURING: 13 growth stages; CONTAINS InterPro DOMAIN/s: Aux/IAA-ARF-dimerisation (InterPro:IPR011525), AUX/IAA protein (InterPro:IPR0033…
Potri.005G216100.v4.1		-1.62711	0.687429	1.8655e-06	3.48659e-06	-1.8925	0.589373	3.25418e-08	6.27166e-08	-1.49315	0.74296	4.94452e-06	7.82796e-06	-1.75779	0.657748	1.27352e-07	2.20585e-07	-1.9678	0.63513	1.44534e-08	2.55868e-08	YES	YES	YES	YES	YES	3.95	3.77	1.46	1.09	0.84	1.36	1.2	1.81	1.54	0.81	0.62	1.5	AT3G63420.2	Ggamma-subunit 1	heterotrimeric G protein gamma-subunit (AGG1) mRNA,	Ggamma-subunit 1 (GG1); FUNCTIONS IN: GTP binding; INVOLVED IN: defense response to fungus, incompatible interaction, acropetal auxin transport, seed germination, lateral root development; LOCATED IN: plasma membrane; EXPRESSED IN: 27 plant structures; EXPRESSED DURING: 13 growth stages; BEST Arabidopsis thaliana protein match is: G-protein gamma subunit 2 (TAIR:AT3G22942.1); Has 72 Blast hits to…
Potri.006G207300.v4.1		1.47708	0.863732	2.64155e-06	4.88708e-06	1.62463	1.0281	4.94159e-08	9.4205e-08	1.97651	1.28744	3.5763e-12	7.40014e-12	1.66453	1.05674	2.15649e-08	3.87486e-08	1.5682	1.02386	2.27626e-07	3.81313e-07	YES	YES	YES	YES	YES	0.94	0.99	2.85	2.73	2.74	3.65	3.84	4.57	3.38	3.11	2.56	3.7	AT3G02875.1	Peptidase M20/M25/M40 family protein	Hydrolyzes amino acid conjugates of the plant growth regulator indole-3-acetic acid (IAA), including IAA-Leu and IAA-Phe. Uses Mg and Co ions as cofactors.	IAA-LEUCINE RESISTANT 1 (ILR1); FUNCTIONS IN: metallopeptidase activity, IAA-Leu conjugate hydrolase activity, IAA-Phe conjugate hydrolase activity; INVOLVED IN: proteolysis, auxin metabolic process; LOCATED IN: endoplasmic reticulum; EXPRESSED IN: 23 plant structures; EXPRESSED DURING: 13 growth stages; CONTAINS InterPro DOMAIN/s: Peptidase M20 (InterPro:IPR002933), Peptidase M20, dimerisation (…
Potri.008G203400.v4.1		1.5072	9.07561	0	0	1.03484	8.76662	5.84758e-230	1.55377e-228	1.30169	8.97508	0	0	1.50743	9.11417	0	0	1.81046	9.37501	0	0	YES	YES	YES	YES	YES	418.16	412.48	1182.52	1264.69	898.46	924.23	1128.38	1120.33	1275.77	1221.3	1611.56	1596.6	AT5G19140.1	Aluminium induced protein with YGL and LRDR motifs		AILP1; FUNCTIONS IN: molecular_function unknown; INVOLVED IN: response to auxin stimulus, response to aluminum ion; LOCATED IN: plasma membrane; EXPRESSED IN: 23 plant structures; EXPRESSED DURING: 13 growth stages; BEST Arabidopsis thaliana protein match is: Aluminium induced protein with YGL and LRDR motifs (TAIR:AT5G43830.1); Has 1807 Blast hits to 1807 proteins in 277 species: Archae - 0; Bac…
Potri.017G001400.v4.1		-1.39308	7.75025	2.0766e-287	9.41681e-286	-2.43005	7.5301	0	0	-3.29419	7.46729	0	0	-2.4908	7.54618	0	0	-2.80177	7.5265	0	0	YES	YES	YES	YES	YES	423.46	449.36	170	174.63	86.89	86.67	49.82	47.93	78.01	86.66	70.28	67.65	AT2G44080.1	ARGOS-like	Encodes ARL, a gene similar to ARGOS involved in cell expansion-dependent organ growth. Upregulated by brassinosteroid. Acts downstream of BRI1.	ARGOS-like (ARL); BEST Arabidopsis thaliana protein match is: auxin-regulated gene involved in organ size (TAIR:AT3G59900.1); Has 88 Blast hits to 88 proteins in 12 species: Archae - 0; Bacteria - 0; Metazoa - 0; Fungi - 0; Plants - 88; Viruses - 0; Other Eukaryotes - 0 (source: NCBI BLink).
